# Supplementary material for: Identification and Validation Model for Informative Liquid Biopsy-Based microRNA Biomarkers: Insights from Germ Cell Tumor In Vitro, In Vivo and Patient-Derived Data
Source: MDPI journal article supplement (doi:10.3390/cells8121637), 2019-12-14
Supplement: s1 [file s1]

microRNA profiling in normal CSF  
(n=384 [plate A] in 4 samples)

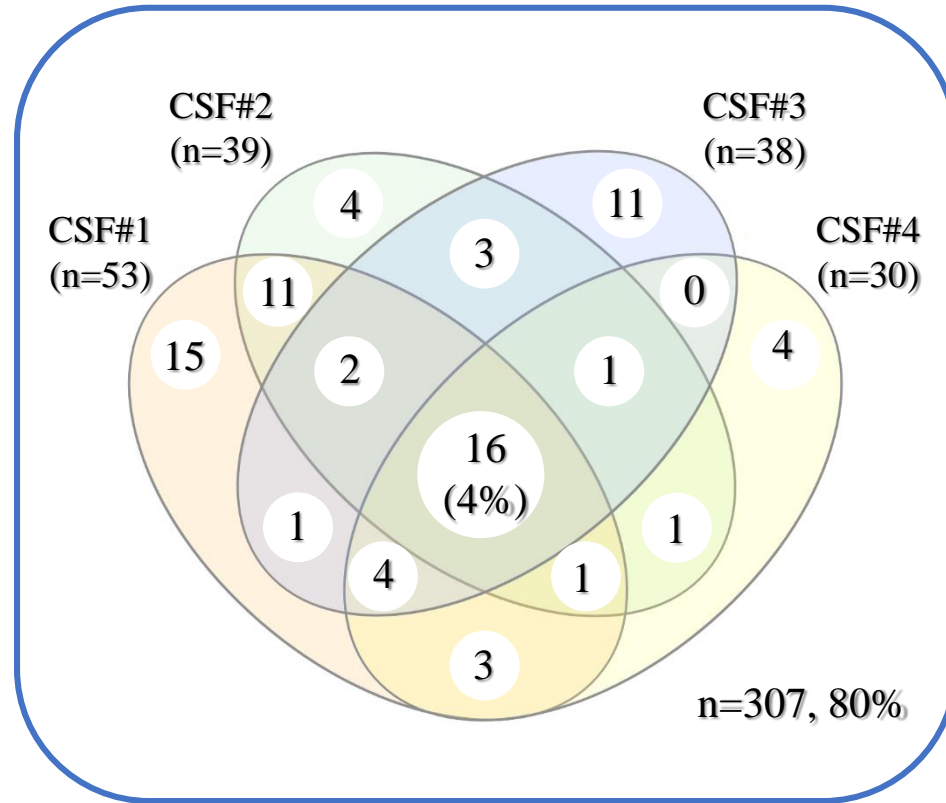

A

microRNA profiling in normal sera  
(n=384 [plate A] in 16 samples)

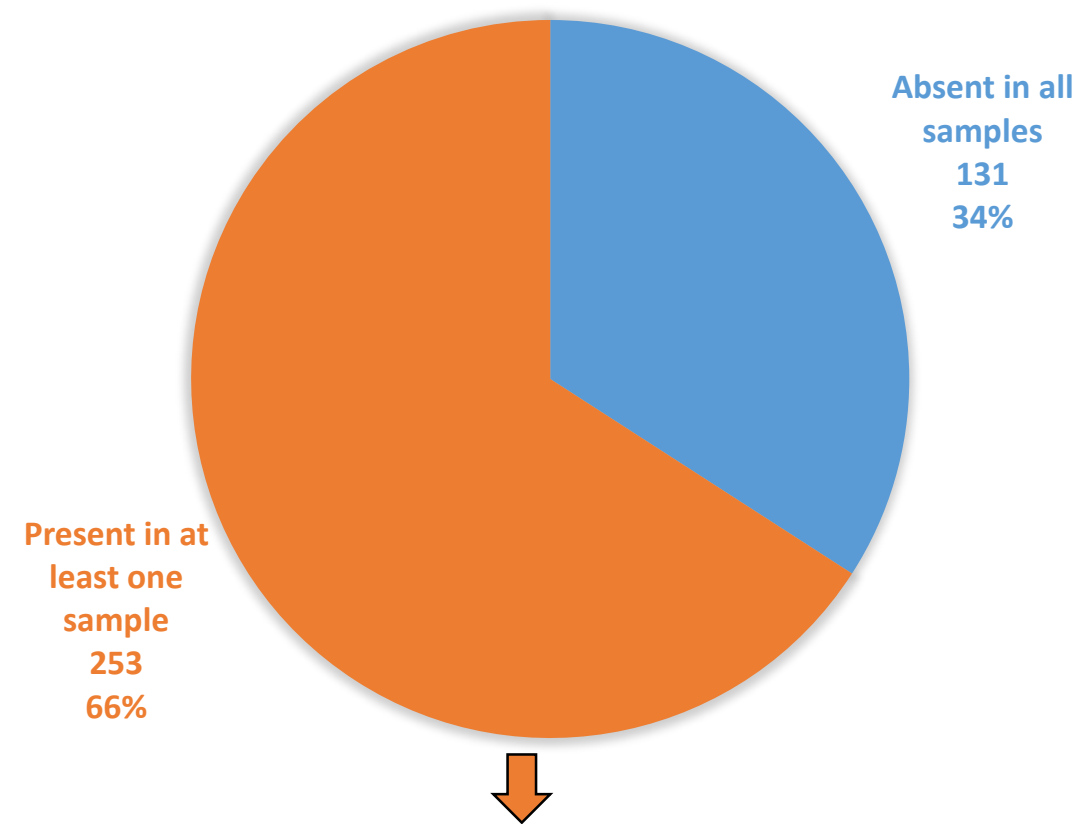

Present in all samples (n=38, 10%)

B

microRNA profiling in normal sera  
(n=764 [plates A+B] in 16 samples)

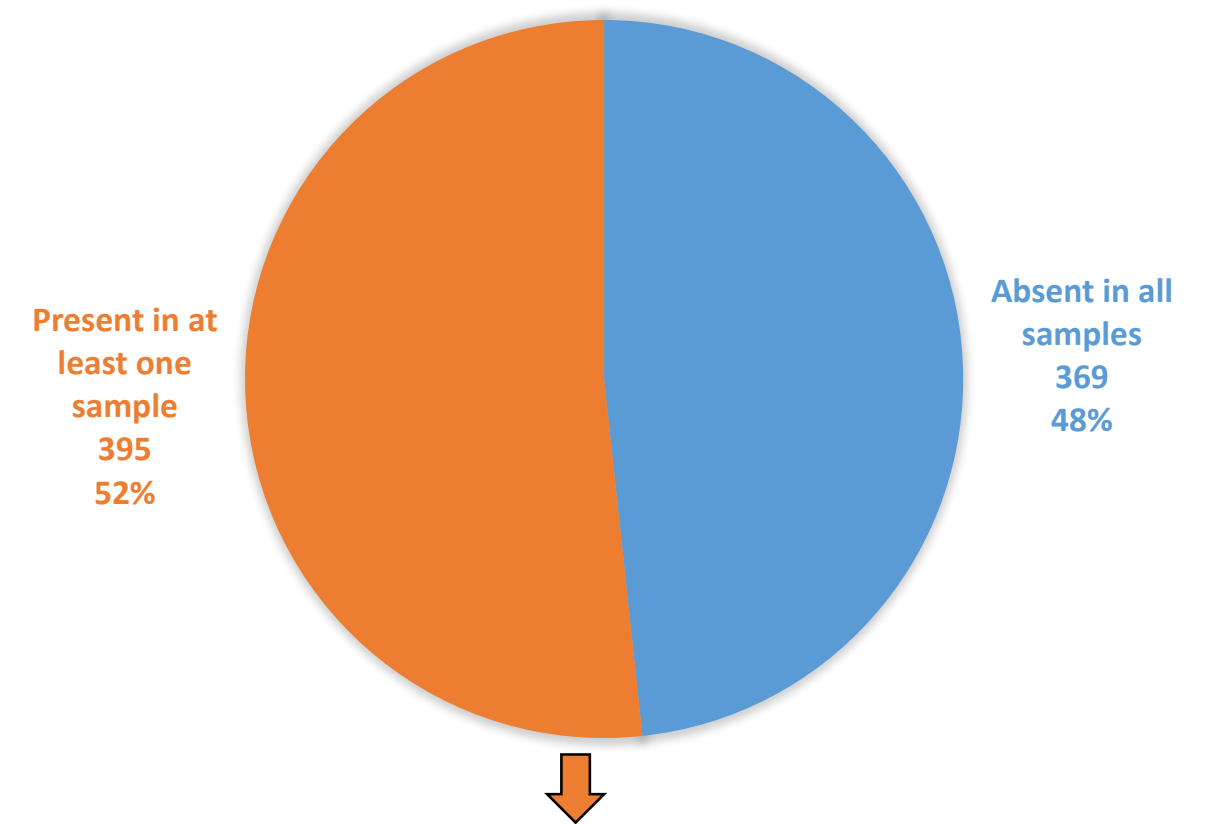

Present in all samples (n=50, 7%)

C
