# Supplementary material for: Identification and Validation Model for Informative Liquid Biopsy-Based microRNA Biomarkers: Insights from Germ Cell Tumor In Vitro, In Vivo and Patient-Derived Data
Source: MDPI journal article supplement (doi:10.3390/cells8121637), 2019-12-14

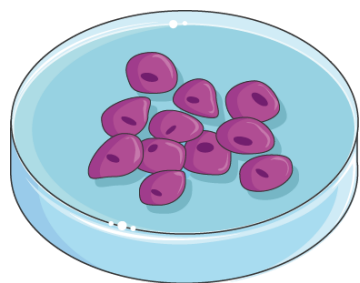

Cell line

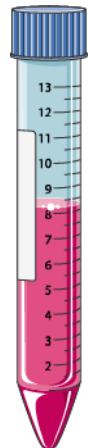

Conditioned medium

microRNA detection?

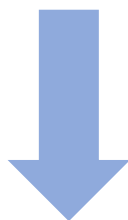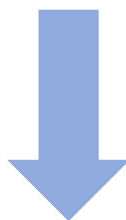

Yes

Yes

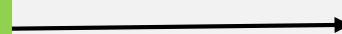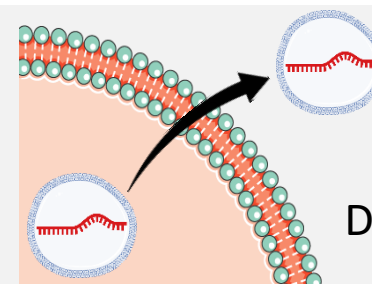

**microRNA secretion**  
Detection in liquid biopsies?

Yes

No

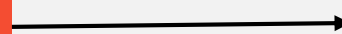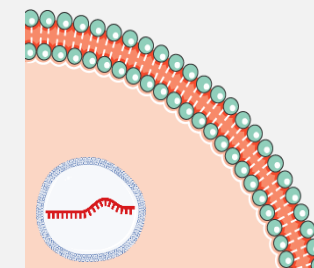

**No microRNA secretion**  
Biological function only?

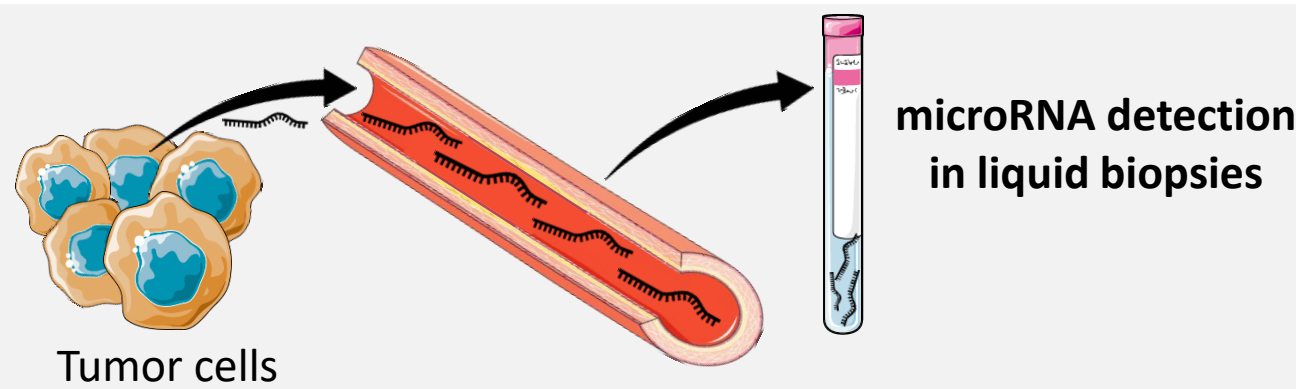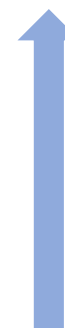

Supplement: s1 [file s1]
