# Supplementary material for: Identification and Validation Model for Informative Liquid Biopsy-Based microRNA Biomarkers: Insights from Germ Cell Tumor In Vitro, In Vivo and Patient-Derived Data
Source: Cells. 2019 Dec 14;8(12):1637. doi: 10.3390/cells8121637 (PMC6952794; doi:10.3390/cells8121637)
Supplement: Supplementary file 1 [file cells-08-01637-s001.zip]

Archive with 18 entries (18 files):
- Supplementary Figure 6.tif
- Supplementary Figure 7.jpg
- Supplementary Figure 8.tif
- Supplementary Figure 9.tif
- Supplementary Figure 10.pdf
- Supplementary Figure 11.pdf
- Supplementary Figure 12.pdf
- Supplementary Figure 13.pdf
- Supplementary File 1.xlsx
- Supplementary File 2.xlsx
- Supplementary Table 1.docx
- Supplementary Table 2.docx
- Supplementary Table 3.docx
- Supplementary Figure 1.pdf
- Supplementary Figure 2.pdf
- Supplementary Figure 3.pdf
- Supplementary Figure 4.tif
- Supplementary Figure 5.tif
