# Supplementary material for: Identification and Validation Model for Informative Liquid Biopsy-Based microRNA Biomarkers: Insights from Germ Cell Tumor In Vitro, In Vivo and Patient-Derived Data
Source: Cells. 2019 Dec 14;8(12):1637. doi: 10.3390/cells8121637 (PMC6952794; doi:10.3390/cells8121637)
Supplement: Supplementary file 1 [file cells-08-01637-s001.zip › Supplementary File 1.xlsx]

## Sheet: Heatmap cells vs medium TCAM
Name of miR	TCam2_Ct	medTCam2_Ct
miR-372	19.8347	20.9161
miR-302a#	25.5141	22.6564
miR-302d	23.2579	23.0074
miR-130b	24.3126	23.9347
miR-302a	24.667	24.0227
miR-205	26.3559	24.1718
miR-373	27.2523	24.6718
miR-148a	28.3716	24.6758
miR-99b	28.1442	24.8262
miR-302b	21.3835	25.0455
miR-378	26.1588	25.0912
miR-224	27.0367	25.1392
miR-200c	22.5326	25.1527
miR-151-3p	25.1884	25.2002
miR-371-3p	25.4336	25.8591
miR-21	28.3785	25.9101
miR-367	24.6044	25.972
miR-342-3p	26.4201	26.3429
miR-222	22.0277	26.4222
miR-130a	25.8752	26.507
miR-193b	26.9766	26.5688
miR-152	30.3583	26.6526
miR-302c	22.5814	26.6957
miR-135b	23.6815	26.7114
miR-218	28.0384	26.7554
miR-423-5p	32.5784	26.9504
miR-186	25.4121	27.0067
miR-203	25.7493	27.0253
miR-139-5p	25.5409	27.3855
miR-660	28.6597	27.4537
miR-146b-5p	26.2411	27.635
miR-132	31.2352	27.6863
miR-886-5p	25.7214	27.9578
miR-375	29.675	27.9814
miR-125a-5p	25.845	28.1608
miR-574-3p	28.5009	28.3275
miR-30a-3p	26.9123	28.4277
miR-345	25.2786	28.4822
miR-192	29.822	28.5659
miR-103	26.7037	28.6304
miR-301b	25.6881	28.7323
miR-19a	25.0867	28.8076
miR-598	28.3964	28.8559
miR-512-3p	25.5263	28.8603
miR-128	31.1279	28.9048
miR-221	26.1533	28.9111
miR-93	25.1959	28.9422
miR-331-3p	26.3761	29.0126
miR-181a	29.0259	29.0405
miR-30d	28.5542	29.4725
miR-105	27.5723	29.6154
miR-27b	30.9714	29.7102
miR-625#	27.3911	29.7536
miR-517c	26.784	29.7548
miR-183#	27.0389	29.7573
miR-183	28.07	29.7648
miR-340	27.8723	29.7907
miR-135a	30.1483	29.9768
miR-590-5p	27.1272	30.0023
miR-532-3p	30.3156	30.0266
miR-517a	26.2614	30.1001
miR-454	24.4726	30.1998
miR-31	24.6479	30.2079
miR-140-5p	28.3264	30.2174
miR-34a#	28.1099	30.2552
miR-9	26.6504	30.2573
miR-361-5p	31.9716	30.3564
miR-519a	27.8697	30.4123
miR-184	31.3791	30.4604
miR-146a	29.7477	30.4873
miR-31#	27.6648	30.5212
miR-532-5p	27.913	30.7415
miR-204	30.7201	30.9484
miR-96	32.3008	30.9976
miR-518b	29.5531	31.0264
miR-629	29.7316	31.0322
miR-1180	33.3251	31.1819
miR-516b	30.6274	31.2128
miR-7#	28.2959	31.2131
miR-302c#	28.4041	31.3068
miR-519d	28.7239	31.4327
miR-886-3p	29.8462	31.6006
miR-636	33.5068	31.7921
miR-425	28.1956	31.8608
miR-185	29.8768	31.9265
miR-452	28.0424	32.1039
miR-363	32.5211	32.1331
miR-151-5P	28.7023	32.1602
miR-29a	27.5229	32.3437
RNU48	25.3807	32.3546
miR-708	25.0683	32.465
miR-324-5p	31.2483	32.477
miR-579	33.0461	32.8001
miR-95	30.4156	32.8471
miR-494	33.1587	32.9224
RNU48	25.9003	32.9966
miR-505#	30.1385	33.3072
miR-625	32.0101	33.32
miR-182	26.3755	33.5307
miR-520b	32.978	33.5816
miR-124	31.9178	33.6794
miR-219-2-3p	32.6904	34.0375
miR-1254	31.2976	34.1727
miR-135b#	30.8867	34.2384
miR-141	26.7811	34.5406
miR-29c	31.2438	34.8647
miR-181a-2#	32.9276	35.1503
miR-27a#	32.1039	35.3824
miR-191#	32.082	35.6345
miR-362-5p	29.5301	35.7667
miR-454#	32.2571	36.3356
miR-18a#	32.0817	36.9796
RNU44	24.6583	40
let-7e	29.3547	40
let-7g	33.6449	40
miR-101	32.4877	40
miR-107	31.6763	40
miR-10b	33.3559	40
miR-129-3p	33.8955	40
miR-139-3p	31.5656	40
miR-140-3p	30.6222	40
miR-149	24.9514	40
miR-155	32.4551	40
miR-15a	33.7745	40
miR-181c	33.4459	40
miR-187	27.5287	40
miR-18a	28.8328	40
miR-18b	31.8514	40
miR-190	33.4256	40
miR-194	31.9871	40
miR-196b	32.3501	40
miR-200a	32.6954	40
miR-200b	30.7466	40
miR-210	26.2405	40
miR-211	32.8219	40
miR-22	32.8176	40
miR-28-5p	28.6928	40
miR-296-3p	33.7631	40
miR-29b	32.2728	40
miR-32	31.9633	40
miR-324-3p	30.4686	40
miR-326	33.2743	40
miR-339-3p	28.8303	40
miR-339-5p	29.6128	40
miR-449a	31.2734	40
miR-450b-5p	33.4801	40
miR-455-3p	31.143	40
miR-455-5p	31.0803	40
miR-486-5p	31.6451	40
miR-491-5p	30.9769	40
miR-500	30.9464	40
miR-501-5p	32.361	40
miR-503	32.8835	40
miR-504	31.5288	40
miR-505	32.3369	40
miR-515-3p	32.7637	40
miR-515-5p	31.7371	40
miR-518a-3p	31.208	40
miR-518c	33.7545	40
miR-518d-5p	33.2729	40
miR-518e	29.2211	40
miR-518f	29.3816	40
miR-519c-3p	31.5016	40
miR-520a-3p	32.4602	40
miR-520g	27.2204	40
miR-522	29.9679	40
miR-523	33.0659	40
miR-525-3p	28.7074	40
miR-525-5p	33.0222	40
miR-542-3p	33.9571	40
miR-542-5p	33.9508	40
miR-652	32.686	40
miR-744	28.8099	40
RNU44	23.8311	40
miR-106b#	29.275	40
miR-1201	33.6052	40
miR-1224-3P	32.4272	40
miR-1225-3P	33.4125	40
miR-1227	31.6825	40
miR-1233	30.8301	40
miR-1247	31.4269	40
miR-1271	29.4206	40
miR-130b#	26.9496	40
miR-148a#	33.9411	40
miR-148b#	32.4201	40
miR-15a#	32.5588	40
miR-15b#	28.2217	40
miR-16-1#	33.6333	40
miR-181c#	33.4592	40
miR-193b#	33.5522	40
miR-20a#	31.558	40
miR-222#	29.2146	40
miR-24-2#	33.9873	40
miR-26b#	33.6343	40
miR-302b#	33.3123	40
miR-302d#	30.1183	40
miR-30d#	33.6935	40
miR-335#	28.5655	40
miR-33a#	33.752	40
miR-34b	30.4573	40
miR-378	33.8869	40
miR-424#	33.9724	40
miR-425#	30.3051	40
miR-519b-3p	30.2044	40
miR-520D-3P	30.0116	40
miR-520h	30.1169	40
miR-524	32.89	40
miR-589	30.4205	40
miR-590-3P	30.1702	40
miR-592	32.8835	40
miR-596	31.1274	40
miR-628-3p	32.1241	40
miR-664	26.8514	40
miR-675	31.4842	40
miR-7-2#	32.5878	40
miR-766	30.1204	40
miR-767-5p	28.8395	40
miR-769-5p	30.826	40
miR-9#	27.8432	40
miR-92b#	31.4509	40
miR-93#	26.4124	40
miR-935	30.5123	40
miR-939	33.0387	40
miR-941	31.3274	40
miR-942	31.7481	40
miR-944	33.2309	40

## Sheet: Heatmap cells vs medium NT2
miR name	NT2_Ct	medNT2_Ct
miR-302a#	20.672	21.3061
miR-302d	19.2103	21.4954
miR-1183	32.7031	22.615
miR-367	17.3903	23.6724
miR-302a	18.3066	23.8
miR-302b	16.4773	24.6288
miR-21	25.0681	25.5564
miR-302c	20.2214	26.6589
miR-423-5p	31.8398	26.8924
miR-186	22.1711	26.963
miR-148a	27.6908	27.2503
miR-660	26.4636	27.2693
miR-151-3p	25.092	27.2953
miR-532-5p	25.4968	27.5354
miR-574-3p	26.8469	27.5538
miR-9#	27.4438	27.6182
miR-218	28.2739	27.6987
miR-193b	25.565	27.7016
miR-342-3p	26.3353	27.7539
miR-378	23.4722	27.9414
miR-130b	26.5599	28.1229
miR-99a	29.6073	28.1755
miR-192	27.7335	28.5808
miR-19a	20.687	28.7297
miR-93	21.7141	28.7721
miR-99b	26.5609	28.946
miR-331-3p	24.7808	29.1211
miR-193a-5p	27.867	29.1278
miR-152	30.8769	29.215
miR-9	26.1969	29.3557
miR-130a	24.0428	29.5112
miR-100	28.5494	29.8562
miR-224	28.6827	30.0364
miR-205	28.4503	30.0814
miR-532-3p	27.8349	30.1029
miR-146b-5p	27.6654	30.1112
miR-576-3p	30.6148	30.1205
miR-184	33.8531	30.1412
miR-204	26.4208	30.2034
miR-211	30.3392	30.2073
miR-128	27.2223	30.346
miR-489	29.2199	30.4722
miR-222	20.3509	30.5037
miR-455-3p	27.4089	30.5252
miR-200b	29.8859	30.6174
miR-494	31.701	30.8457
miR-146a	29.6367	30.9055
miR-140-5p	24.7728	31.0502
miR-425	26.8851	31.078
miR-598	27.3521	31.1208
RNU48	25.4129	31.4298
miR-375	30.9026	31.5682
miR-455-5p	28.2695	31.5742
miR-135b	22.9239	31.7838
miR-34a#	27.7701	31.8525
miR-135a	22.4727	31.8612
miR-590-5p	25.1674	31.8754
miR-491-5p	28.4672	31.9071
miR-27b	28.4038	31.9153
miR-7#	25.5063	32.164
miR-1270	31.1419	32.2618
miR-625	31.2537	32.2937
RNU48	25.9741	32.338
miR-522	29.1829	32.4977
miR-93#	23.2049	32.5404
miR-1276	33.5474	32.5993
miR-500	28.5815	32.6591
miR-629	29.1374	32.6787
miR-874	32.12	32.7413
miR-523	30.0458	32.8147
miR-31#	27.6303	33.012
miR-125a-5p	25.0881	33.162
miR-371-3p	33.4446	33.2344
miR-518f	28.8318	33.3482
miR-95	30.0963	33.398
miR-29a	24.549	33.5552
miR-519a	27.1371	33.7674
miR-151-5P	28.2721	33.8641
miR-516b	33.3746	33.881
miR-505#	30.2044	33.946
miR-744#	32.8101	33.9588
miR-181a-2#	28.7035	34.0192
miR-182	27.1854	35.2585
miR-517c	26.6984	35.7966
RNU44	19.2398	40
let-7e	31.25	40
miR-101	28.4677	40
miR-103	26.3686	40
miR-105	30.723	40
miR-107	32.9134	40
miR-124	31.29	40
miR-125a-3p	31.091	40
miR-127-3p	32.4021	40
miR-129-3p	28.7727	40
miR-129-5p	33.3079	40
miR-132	28.7718	40
miR-133a	31.7522	40
miR-137	33.9364	40
miR-139-3p	32.7912	40
miR-139-5p	26.893	40
miR-140-3p	28.9108	40
miR-141	32.2198	40
miR-149	26.1063	40
miR-153	33.943	40
miR-155	33.151	40
miR-15a	30.5824	40
miR-181a	29.4998	40
miR-183	28.2098	40
miR-185	30.7891	40
miR-187	26.355	40
miR-18a	24.3889	40
miR-18b	26.2844	40
miR-190	30.8126	40
miR-194	28.6964	40
miR-199a-3p	30.7419	40
miR-200a	31.4699	40
miR-200c	26.9614	40
miR-203	31.421	40
miR-210	28.5782	40
miR-219-5p	33.9747	40
miR-221	23.3766	40
miR-23a	32.3322	40
miR-23b	33.7672	40
miR-28-5p	27.4867	40
miR-296-3p	29.767	40
miR-29b	31.571	40
miR-29c	29.415	40
miR-301b	29.6451	40
miR-31	25.1393	40
miR-32	29.9839	40
miR-324-3p	30.0947	40
miR-324-5p	29.3825	40
miR-339-3p	27.0131	40
miR-339-5p	28.1054	40
miR-340	28.4557	40
miR-345	27.4404	40
miR-34c-5p	30.5549	40
miR-361-5p	27.8635	40
miR-362-3p	30.147	40
miR-362-5p	27.6857	40
miR-363	27.7537	40
miR-372	28.4442	40
miR-383	33.4587	40
miR-424	32.8056	40
miR-433	33.2421	40
miR-450b-5p	32.8624	40
miR-452	31.2197	40
miR-454	25.3881	40
miR-486-5p	28.8633	40
miR-488	33.4708	40
miR-491-3p	33.5903	40
miR-501-5p	28.8849	40
miR-502-3p	31.9478	40
miR-502-5p	31.5933	40
miR-503	32.6418	40
miR-504	30.7922	40
miR-505	30.7254	40
miR-508-3p	32.588	40
miR-512-3p	24.5485	40
miR-512-5p	29.6059	40
miR-515-3p	30.0737	40
miR-515-5p	30.6549	40
miR-516a-5p	33.8825	40
miR-517a	25.0339	40
miR-517b	29.4061	40
miR-518a-3p	30.399	40
miR-518b	27.812	40
miR-518c	32.0319	40
miR-518d-5p	31.9541	40
miR-518e	29.2662	40
miR-519c-3p	30.6474	40
miR-519d	28.0441	40
miR-520a-3p	32.8363	40
miR-520a-5p	33.8104	40
miR-520b	31.2308	40
miR-520e	33.1772	40
miR-520f	31.5004	40
miR-520g	26.5433	40
miR-521	33.1775	40
miR-525-3p	28.2524	40
miR-525-5p	32.2368	40
miR-526b	31.3013	40
miR-545	30.6786	40
miR-548b-5p	33.9313	40
miR-548c-5p	33.2564	40
miR-548d-5p	33.9975	40
miR-579	30.2706	40
miR-582-3p	32.9565	40
miR-582-5p	31.3705	40
miR-629	31.5021	40
miR-636	32.4467	40
miR-652	28.6088	40
miR-671-3p	28.4635	40
miR-708	25.3502	40
miR-744	26.4026	40
miR-876-5p	33.8653	40
miR-886-3p	32.8397	40
miR-886-5p	29.5574	40
miR-96	28.6882	40
RNU44	21.4615	40
miR-106a#	32.9625	40
miR-106b#	26.16	40
miR-10b#	32.2773	40
miR-1179	33.777	40
miR-1180	30.4168	40
miR-1201	32.3776	40
miR-1225-3P	29.6109	40
miR-1227	31.9718	40
miR-1233	28.0079	40
miR-124#	31.0922	40
miR-1247	33.2643	40
miR-1251	32.4142	40
miR-1254	32.1414	40
miR-1255B	32.5492	40
miR-1267	33.137	40
miR-1269	28.5833	40
miR-1271	28.8555	40
miR-1285	31.5981	40
miR-1303	30.4709	40
miR-130b#	26.941	40
miR-135b#	27.2664	40
miR-145#	33.6005	40
miR-148a#	33.3517	40
miR-148b#	31.5762	40
miR-15a#	28.35	40
miR-15b#	25.5722	40
miR-16-1#	29.7515	40
miR-17#	30.3884	40
miR-182#	32.4481	40
miR-183#	27.6671	40
miR-18a#	28.6101	40
miR-191#	30.7232	40
miR-192#	33.3788	40
miR-19a#	32.3832	40
miR-20a#	27.2	40
miR-20b#	29.1091	40
miR-22#	32.8137	40
miR-222#	25.7985	40
miR-24-2#	33.8192	40
miR-25#	28.0301	40
miR-26a-1#	28.6655	40
miR-26a-2#	32.7112	40
miR-26b#	32.1537	40
miR-27a#	30.9242	40
miR-27b#	29.8291	40
miR-29a#	32.2963	40
miR-302b#	24.9332	40
miR-302c#	25.1223	40
miR-302d#	25.1044	40
miR-30a-3p	28.0929	40
miR-30d	29.3641	40
miR-30d#	31.949	40
miR-335#	28.4144	40
miR-33a#	29.3304	40
miR-34b	30.3517	40
miR-363#	30.8336	40
miR-374a#	31.8565	40
miR-374b#	33.0369	40
miR-378	30.2287	40
miR-424#	31.784	40
miR-454#	31.0206	40
miR-500	32.9821	40
miR-518c#	33.3027	40
miR-519b-3p	29.7331	40
miR-519e#	32.5044	40
miR-520D-3P	28.2712	40
miR-520h	29.0195	40
miR-524	33.3292	40
miR-545#	32.1792	40
miR-577	30.2288	40
miR-584	33.3021	40
miR-589	29.2364	40
miR-590-3P	28.0144	40
miR-592	27.4966	40
miR-596	26.1964	40
miR-605	32.2992	40
miR-616	33.5263	40
miR-625#	27.6602	40
miR-641	33.3114	40
miR-661	31.6803	40
miR-663B	33.6445	40
miR-664	27.9478	40
miR-675	32.6186	40
miR-7-2#	32.8341	40
miR-766	28.7938	40
miR-767-5p	32.6452	40
miR-769-3p	33.8107	40
miR-769-5p	29.1019	40
miR-92a-1#	27.5598	40
miR-92a-2#	32.0554	40
miR-92b#	29.6203	40
miR-935	29.0695	40
miR-941	32.4626	40
miR-942	29.1661	40

## Sheet: Heatmap cells vs medium NCCIT
GeneName	NCCIT_Ct	medNCCIT_Ct
miR-302d	22.5296	24.1453
miR-302a#	23.4419	25.5406
miR-302b	20.4455	26.302
miR-372	25.8865	26.6352
miR-367	20.9126	27.217
miR-302a	21.9966	27.3946
miR-378	23.7479	27.5557
miR-130b	27.2301	28.3356
miR-342-3p	27.3713	29.0314
miR-186	24.7325	29.1993
miR-302c	23.1014	29.4534
miR-361-5p	28.9341	29.983
miR-205	29.3115	30.1016
miR-148a	29.2359	30.2695
miR-222	23.585	30.3711
miR-192	29.56	30.4196
miR-7#	28.109	30.4731
miR-130a	26.6569	30.7741
miR-21	27.4285	30.8063
miR-93	24.2926	30.8878
miR-128	28.6962	30.9058
miR-331-3p	26.0816	30.931
miR-572	32.4768	31.0283
miR-183#	28.1734	31.1921
miR-99b	29.2858	31.4095
miR-135a	29.0648	31.469
miR-574-3p	29.8942	31.5011
miR-517c	26.8536	31.6387
miR-218	31.9347	31.681
miR-660	28.2681	31.7418
miR-19a	22.9877	31.7419
miR-886-5p	26.8558	31.8404
miR-193b	29.0668	31.865
miR-31#	28.131	31.9131
miR-625#	28.1231	31.9359
let-7e	30.797	31.9835
miR-516b	31.141	32.5843
miR-517a	26.5593	32.652
miR-520f	33.5872	32.6804
miR-522	29.9921	32.9126
miR-146b-5p	29.4496	32.9377
miR-371-3p	31.2558	32.9562
miR-31	26.6469	32.9691
miR-345	27.7723	33.1262
miR-423-5p	31.2122	33.2516
miR-302b#	27.2011	33.3918
miR-340	28.1318	33.6372
let-7g	33.896	33.7211
miR-1180	29.3213	34.0114
miR-140-5p	27.3451	34.1583
miR-135b	27.8297	34.167
miR-204	33.2398	34.247
miR-151-5P	29.9707	34.2579
miR-532-3p	29.6058	34.3098
miR-99a	31.9756	34.4127
miR-146a	30.879	34.5947
miR-27a#	33.2656	35.0329
miR-362-3p	32.855	35.6841
miR-505#	31.1647	35.7409
RNU44	23.6404	40
RNU48	23.9677	40
miR-100	30.3889	40
miR-101	32.469	40
miR-103	27.5902	40
miR-105	33.6196	40
miR-107	32.8822	40
miR-124	33.3645	40
miR-125a-5p	28.8615	40
miR-129-3p	31.6541	40
miR-132	29.4834	40
miR-140-3p	31.8853	40
miR-149	26.4366	40
miR-153	33.8216	40
miR-155	31.0532	40
miR-181a	31.2963	40
miR-182	28.2436	40
miR-183	30.0079	40
miR-185	32.051	40
miR-187	29.0699	40
miR-18a	26.512	40
miR-18b	28.591	40
miR-194	31.7288	40
miR-199a-3p	33.6465	40
miR-200c	30.3213	40
miR-210	30.3434	40
miR-215	33.4684	40
miR-219-2-3p	32.7691	40
miR-219-5p	31.4866	40
miR-22	31.6379	40
miR-221	25.5924	40
miR-224	31.0717	40
miR-27b	30.142	40
miR-28-5p	30.5692	40
miR-296-3p	30.9733	40
miR-29a	29.4536	40
miR-29b	33.7937	40
miR-301b	30.1554	40
miR-32	33.3547	40
miR-324-3p	31.5756	40
miR-324-5p	30.1353	40
miR-326	33.4754	40
miR-339-3p	31.372	40
miR-339-5p	31.3651	40
miR-362-5p	30.5034	40
miR-363	28.7065	40
miR-373	29.7513	40
miR-424	33.4278	40
miR-425	29.6028	40
miR-448	33.6105	40
miR-449b	32.9662	40
miR-452	32.912	40
miR-454	27.3301	40
miR-455-3p	29.0032	40
miR-455-5p	30.9755	40
miR-485-3p	33.3034	40
miR-488	32.6333	40
miR-491-5p	30.153	40
miR-500	30.2014	40
miR-501-3p	33.9749	40
miR-501-5p	31.1257	40
miR-502-5p	32.9838	40
miR-504	32.4967	40
miR-505	32.4668	40
miR-512-3p	26.3495	40
miR-512-5p	30.9377	40
miR-515-5p	31.051	40
miR-516a-5p	33.468	40
miR-517b	29.9757	40
miR-518a-3p	32.5303	40
miR-518b	30.6582	40
miR-518c	33.0053	40
miR-518d-5p	32.866	40
miR-518e	30.1094	40
miR-518f	30.0976	40
miR-519a	28.6451	40
miR-519c-3p	30.8906	40
miR-519d	30.1825	40
miR-520a-5p	32.0922	40
miR-520b	33.1915	40
miR-520g	27.5456	40
miR-521	33.0936	40
miR-525-3p	30.6587	40
miR-525-5p	32.5257	40
miR-532-5p	27.3862	40
miR-545	32.7197	40
miR-548d-3p	33.7732	40
miR-579	31.9417	40
miR-590-5p	28.0537	40
miR-598	29.9035	40
miR-625	33.6465	40
miR-629	33.6692	40
miR-652	31.708	40
miR-671-3p	30.3711	40
miR-708	30.3677	40
miR-744	28.0629	40
miR-874	33.0269	40
miR-886-3p	27.3338	40
miR-9	27.5164	40
miR-95	31.2806	40
miR-96	31.1444	40
RNU48	23.9399	40
miR-106a#	33.6619	40
miR-106b#	27.5452	40
miR-1201	32.0764	40
miR-1227	33.4827	40
miR-124#	33.6639	40
miR-1264	33.307	40
miR-1269	32.2169	40
miR-1270	30.9892	40
miR-1271	32.8605	40
miR-1285	33.7288	40
miR-1298	33.05	40
miR-1303	32.0577	40
miR-130b#	28.988	40
miR-135b#	33.0108	40
miR-148b#	31.7131	40
miR-151-3p	26.7264	40
miR-15a#	32.4245	40
miR-15b#	27.5597	40
miR-181a-2#	32.6556	40
miR-18a#	31.2905	40
miR-191#	32.273	40
miR-194#	33.8984	40
miR-20a#	30.785	40
miR-20b#	31.0915	40
miR-22#	31.8699	40
miR-222#	28.0251	40
miR-24-2#	33.59	40
miR-25#	31.9362	40
miR-26a-1#	32.3453	40
miR-26b#	33.9789	40
miR-29b-1#	33.4517	40
miR-302c#	26.7593	40
miR-302d#	27.4274	40
miR-30a-3p	31.2742	40
miR-30d	29.8611	40
miR-335#	28.5316	40
miR-33a#	33.2192	40
miR-34b	32.6579	40
miR-363#	29.7287	40
miR-374b#	32.9358	40
miR-378	29.2015	40
miR-425#	29.795	40
miR-500	31.8108	40
miR-519b-3p	30.4432	40
miR-519e#	31.2872	40
miR-520D-3P	29.0686	40
miR-520h	28.2629	40
miR-524	32.3718	40
miR-545#	31.7283	40
miR-548H	33.5924	40
miR-589	32.3706	40
miR-590-3P	30.2491	40
miR-592	31.2632	40
miR-596	29.9052	40
miR-622	32.9356	40
miR-629	29.0296	40
miR-664	30.4343	40
miR-675	30.1835	40
miR-744#	32.1274	40
miR-765	33.4221	40
miR-766	27.0012	40
miR-769-5p	28.9265	40
miR-9#	29.584	40
miR-92a-1#	30.1714	40
miR-92a-2#	32.941	40
miR-92b#	31.5359	40
miR-93#	25.8802	40
miR-941	31.3652	40
miR-942	31.2513	40

## Sheet: Heatmap cells vs medium 2102Ep
GeneName	2102Ep_Ct	med2102Ep_Ct
miR-302a#	26.5763	21.6416
miR-372	21.4629	22.367
miR-302d	24.7957	23.2019
miR-302b	22.9157	23.3433
miR-367	26.5204	24.643
miR-9#	30.972	24.7266
miR-302a	26.2262	25.1874
miR-21	31.5219	25.3182
miR-520D-3P	26.8927	25.9224
miR-148a	31.4655	25.932
miR-373	30.4039	26.0613
miR-378	27.3174	26.576
miR-371-3p	27.0894	26.7324
miR-363	33.6491	26.7451
miR-376a	29.4201	26.976
miR-151-3p	29.2609	26.9769
miR-660	31.4435	27.0672
miR-302c	25.4147	27.2407
miR-512-3p	24.5341	27.2659
miR-184	31.1987	27.3145
miR-302c#	29.3351	27.6158
miR-186	26.851	27.7215
miR-218	30.8753	27.7761
miR-146a	29.0984	27.8427
miR-205	30.9005	27.8506
miR-193b	28.15	28.128
miR-574-3p	32.0068	28.2744
miR-99b	31.5895	28.4966
miR-522	28.6431	28.5131
miR-342-3p	29.8087	28.9608
miR-517c	26.7145	28.9985
miR-203	33.3576	29.157
miR-200c	26.4157	29.2166
miR-532-5p	30.1375	29.2572
miR-517a	26.0428	29.3556
miR-532-3p	30.6363	29.3893
miR-491-5p	32.8316	29.5439
miR-519a	27.0679	30.0264
miR-128	32.4455	30.0758
miR-19a	27.1295	30.2603
miR-454	28.5839	30.3225
miR-125a-5p	29.1754	30.5346
miR-192	31.1599	30.5507
miR-204	33.2512	30.648
miR-519d	27.8611	30.7135
miR-222	25.071	30.8992
miR-135b	28.5886	30.9088
miR-130b	30.5196	30.9786
miR-146b-5p	31.8023	31.2378
miR-34a#	32.384	31.332
miR-155	31.4098	31.4891
miR-130a	30.5687	31.5018
miR-517b	30.0379	31.5732
miR-93	27.3731	31.5795
miR-29a	30.0532	31.667
miR-103	30.8423	31.8834
miR-433	32.1242	31.8839
miR-340	33.3438	32.2241
miR-495	31.5599	32.304
miR-31	26.6688	32.5181
miR-302b#	33.6463	32.6364
miR-1270	33.5935	32.6638
miR-489	32.2398	32.8181
miR-518e	28.3223	33.0298
miR-31#	29.8201	33.1093
miR-140-5p	29.4113	33.2893
miR-324-3p	33.0716	33.7129
miR-886-3p	31.2855	34.2339
miR-744	30.362	34.4199
miR-182	29.0849	34.9638
miR-151-5P	33.0995	36.5083
miR-135a	32.2268	36.596
RNU44	25.7063	40
RNU48	26.6249	40
miR-100	33.9512	40
miR-127-3p	30.2115	40
miR-129-3p	33.2323	40
miR-132	32.7222	40
miR-134	30.7625	40
miR-140-3p	31.9379	40
miR-141	29.9604	40
miR-149	29.1483	40
miR-183	32.2453	40
miR-187	31.695	40
miR-18a	31.8791	40
miR-18b	33.9261	40
miR-193a-3p	33.761	40
miR-193a-5p	32.189	40
miR-196b	33.3014	40
miR-210	30.6628	40
miR-211	33.1521	40
miR-221	28.961	40
miR-28-5p	31.9181	40
miR-301b	33.6801	40
miR-331-3p	27.7897	40
miR-339-3p	31.6958	40
miR-339-5p	33.2767	40
miR-345	30.1364	40
miR-362-5p	31.4221	40
miR-370	30.943	40
miR-375	31.3743	40
miR-379	31.6666	40
miR-410	32.4526	40
miR-424	33.8916	40
miR-425	30.9555	40
miR-431	31.4368	40
miR-452	32.8175	40
miR-455-3p	33.5104	40
miR-485-3p	30.6247	40
miR-486-5p	32.8586	40
miR-487b	32.7226	40
miR-493	33.264	40
miR-494	31.0323	40
miR-500	32.8894	40
miR-501-5p	33.2344	40
miR-502-5p	33.9314	40
miR-515-3p	33.6368	40
miR-515-5p	32.1889	40
miR-516b	32.8664	40
miR-518a-3p	29.9391	40
miR-518b	28.536	40
miR-518c	32.2366	40
miR-518d-5p	32.911	40
miR-518f	29.1409	40
miR-519c-3p	30.7861	40
miR-520a-3p	32.3259	40
miR-520b	31.9528	40
miR-520g	26.9833	40
miR-523	31.0065	40
miR-525-3p	28.7446	40
miR-539	30.4302	40
miR-590-5p	29.4344	40
miR-598	32.8302	40
miR-655	32.7677	40
miR-708	31.9458	40
miR-886-5p	30.4546	40
miR-9	29.639	40
miR-95	33.639	40
RNU44	26.1678	40
RNU48	27.3094	40
miR-106b#	32.9102	40
miR-1247	33.9945	40
miR-1271	33.605	40
miR-130b#	33.2233	40
miR-15b#	32.062	40
miR-183#	31.006	40
miR-20a#	32.0744	40
miR-222#	30.1091	40
miR-25#	33.0115	40
miR-26a-1#	33.7311	40
miR-302d#	30.0102	40
miR-30a-3p	31.897	40
miR-425#	33.6868	40
miR-454#	33.6172	40
miR-505#	32.9828	40
miR-519b-3p	30.2293	40
miR-520h	30.2607	40
miR-590-3P	31.7092	40
miR-596	30.5606	40
miR-625#	30.2575	40
miR-629	31.7853	40
miR-664	30.2669	40
miR-675	32.8867	40
miR-7#	29.9907	40
miR-766	29.7762	40
miR-769-5p	33.3629	40
miR-92a-2#	33.8954	40
miR-93#	28.4198	40
miR-935	33.5735	40
miR-942	32.4275	40
