# Supplementary material for: Identification and Validation Model for Informative Liquid Biopsy-Based microRNA Biomarkers: Insights from Germ Cell Tumor In Vitro, In Vivo and Patient-Derived Data
Source: Cells. 2019 Dec 14;8(12):1637. doi: 10.3390/cells8121637 (PMC6952794; doi:10.3390/cells8121637)
Supplement: Supplementary file 1 [file cells-08-01637-s001.zip › Supplementary File 2.xlsx]

## Sheet: CSF samples card A
Target Name	CSF#1_Ct	CSF#2_Ct	CSF#3_Ct	CSF#4_Ct
hsa-let-7a-000377	40	40	40	40
hsa-let-7c-000379	40	32.845	33.977	34.682
hsa-let-7d-002283	40	40	40	40
hsa-let-7e-002406	40	40	40	33.781
hsa-let-7f-000382	40	40	40	40
hsa-let-7g-002282	34.994	40	40	40
hsa-miR-1-002222	40	40	40	40
hsa-miR-9-000583	40	40	40	40
hsa-miR-10a-000387	40	40	40	40
hsa-miR-10b-002218	40	40	40	40
U6 snRNA-001973	34.667	40	33.982	40
U6 snRNA-001973	34.136	40	40	40
hsa-miR-15a-000389	40	40	40	40
hsa-miR-15b-000390	40	40	40	40
hsa-miR-16-000391	32.421	40	40	40
hsa-miR-17-002308	28.206	29.132	29.546	30.944
hsa-miR-18a-002422	40	40	40	40
hsa-miR-18b-002217	40	40	40	40
hsa-miR-19a-000395	40	40	40	40
hsa-miR-19b-000396	31.626	32.434	40	40
hsa-miR-20a-000580	40	40	40	35.062
hsa-miR-20b-001014	40	40	32.627	40
hsa-miR-21-000397	30.238	32.927	40	40
hsa-miR-22-000398	40	40	40	40
hsa-miR-23a-000399	40	40	40	40
hsa-miR-23b-000400	40	40	40	40
hsa-miR-24-000402	37.023	40	40	40
hsa-miR-25-000403	34.983	34.974	34.707	40
hsa-miR-26a-000405	33.947	40	40	40
hsa-miR-26b-000407	40	35.099	40	40
hsa-miR-27a-000408	32.965	40	40	26.003
hsa-miR-27b-000409	40	40	40	40
hsa-miR-28-3p-002446	32.468	31.501	32.448	32.387
hsa-miR-28-000411	40	40	40	40
U6 snRNA-001973	33.511	40	40	40
U6 snRNA-001973	33.383	40	35.157	40
hsa-miR-29a-002112	33.983	33.887	40	35.54
hsa-miR-29b-000413	40	40	40	40
hsa-miR-29c-000587	36.98	40	40	40
hsa-miR-30b-000602	33.368	33.998	40	33.89
hsa-miR-30c-000419	31.181	32.201	33.364	33.26
hsa-miR-31-002279	40	40	40	40
hsa-miR-32-002109	40	40	40	40
hsa-miR-33b-002085	40	40	40	40
hsa-miR-34a-000426	40	40	40	33.425
hsa-miR-34c-000428	40	40	40	40
hsa-miR-92a-000431	32.456	32.365	40	40
mmu-miR-93-001090	40	40	40	40
hsa-miR-95-000433	32.969	33.049	36.887	37.227
mmu-miR-96-000186	40	40	40	40
hsa-miR-98-000577	40	40	40	40
hsa-miR-99a-000435	31.493	32.528	32.553	32.979
hsa-miR-99b-000436	40	32.521	40	40
hsa-miR-100-000437	32.338	31.615	31.841	40
hsa-miR-101-002253	40	40	40	40
hsa-miR-103-000439	40	40	40	40
hsa-miR-105-002167	40	40	40	40
hsa-miR-106a-002169	29.147	30.271	30.902	29.447
RNU44-001094	40	40	40	40
hsa-miR-106b-000442	31.289	32.288	32.478	32.594
hsa-miR-107-000443	40	40	40	40
hsa-miR-122-002245	40	40	40	40
mmu-miR-124a-001182	40	40	40	40
hsa-miR-125a-3p-002199	40	40	40	40
hsa-miR-125a-5p-002198	34.288	40	40	40
hsa-miR-125b-000449	31.659	32.378	32.269	40
hsa-miR-126-002228	34.835	40	35.187	34.74
hsa-miR-127-000452	40	40	40	40
hsa-miR-127-5p-002229	40	40	40	40
hsa-miR-128a-002216	40	40	40	40
mmu-miR-129-3p-001184	40	40	40	40
hsa-miR-129-000590	40	40	40	40
hsa-miR-130a-000454	40	40	40	40
hsa-miR-130b-000456	40	40	40	40
hsa-miR-132-000457	40	40	40	40
hsa-miR-133a-002246	40	40	40	40
hsa-miR-133b-002247	40	40	40	40
mmu-miR-134-001186	40	40	40	40
hsa-miR-135a-000460	40	40	40	40
hsa-miR-135b-002261	40	40	40	40
hsa-miR-136-000592	40	40	40	40
mmu-miR-137-001129	40	40	40	40
hsa-miR-138-002284	40	40	40	40
hsa-miR-139-3p-002313	40	40	40	40
hsa-miR-139-5p-002289	40	40	40	40
hsa-miR-140-3p-002234	40	40	40	40
mmu-miR-140-001187	40	40	40	40
hsa-miR-141-000463	40	40	40	40
hsa-miR-142-3p-000464	40	40	40	35.011
hsa-miR-142-5p-002248	40	40	40	40
hsa-miR-143-002249	40	34.151	40	40
hsa-miR-145-002278	33.061	40	40	40
hsa-miR-146a-000468	29.052	34.334	35.107	40
hsa-miR-146b-3p-002361	40	40	40	40
hsa-miR-146b-001097	40	40	34.226	40
hsa-miR-147b-002262	40	40	40	40
hsa-miR-148a-000470	40	40	40	40
hsa-miR-148b-000471	27.759	40	40	40
hsa-miR-149-002255	40	40	40	40
hsa-miR-150-000473	27.339	32.913	33.085	33
hsa-miR-152-000475	40	35.561	40	40
mmu-miR-153-001191	40	40	40	40
hsa-miR-154-000477	40	40	40	40
hsa-miR-181a-000480	40	40	40	40
hsa-miR-181c-000482	40	40	40	40
hsa-miR-182-002334	40	40	40	40
RNU48-001006	40	40	40	40
hsa-miR-183-002269	40	40	40	40
hsa-miR-184-000485	40	40	40	40
hsa-miR-185-002271	40	40	40	40
hsa-miR-186-002285	33.361	40	35.223	33.443
mmu-miR-187-001193	40	34.905	40	40
hsa-miR-188-3p-002106	40	40	40	40
hsa-miR-190-000489	40	40	40	40
hsa-miR-191-002299	40	40	40	34.546
hsa-miR-192-000491	33.21	37.25	40	34.164
hsa-miR-193a-3p-002250	40	40	40	40
hsa-miR-193a-5p-002281	40	40	40	40
hsa-miR-193b-002367	40	35.235	40	40
hsa-miR-194-000493	34.044	40	40	38.768
hsa-miR-195-000494	35.595	40	40	40
hsa-miR-196b-002215	40	40	40	40
hsa-miR-197-000497	31.966	32.956	40	40
hsa-miR-198-002273	34.591	40	40	40
hsa-miR-199a-000498	40	40	40	40
hsa-miR-199a-3p-002304	40	40	40	40
hsa-miR-199b-000500	40	40	40	40
hsa-miR-200a-000502	40	40	40	40
hsa-miR-200b-002251	40	40	40	40
hsa-miR-200c-002300	40	40	40	40
hsa-miR-202-002363	33.014	33.643	40	36.789
hsa-miR-203-000507	32.441	40	40	40
hsa-miR-204-000508	26.72	27.186	29.135	29.101
hsa-miR-205-000509	40	40	40	40
hsa-miR-208b-002290	40	40	40	40
hsa-miR-210-000512	40	40	40	40
hsa-miR-214-002306	40	40	33.215	40
hsa-miR-215-000518	40	40	40	40
hsa-miR-216a-002220	40	40	40	40
hsa-miR-216b-002326	40	40	40	40
hsa-miR-217-002337	40	40	40	40
hsa-miR-218-000521	40	40	40	40
hsa-miR-219-000522	35.934	40	40	40
hsa-miR-221-000524	40	40	40	40
hsa-miR-222-002276	31.677	31.899	40	37.014
hsa-miR-223-002295	31.974	33.212	40	34.234
hsa-miR-224-002099	40	40	40	40
hsa-miR-296-3p-002101	40	40	40	40
hsa-miR-296-000527	33.265	31.977	32.376	32.985
hsa-miR-299-3p-001015	40	40	40	40
hsa-miR-299-5p-000600	40	40	40	40
hsa-miR-301-000528	40	40	40	40
hsa-miR-301b-002392	40	40	40	40
hsa-miR-302a-000529	40	40	40	35.658
ath-miR159a-000338	24.941	25.353	25.388	25.366
hsa-miR-302b-000531	40	40	40	40
hsa-miR-302c-000533	40	40	40	40
hsa-miR-320-002277	34.45	32.191	31.643	31.642
hsa-miR-323-3p-002227	34.721	34.724	32.725	34.695
hsa-miR-324-3p-002161	40	37.079	40	40
hsa-miR-324-5p-000539	40	40	40	40
hsa-miR-326-000542	40	40	40	40
hsa-miR-328-000543	40	40	40	40
hsa-miR-329-001101	40	40	40	40
hsa-miR-330-000544	40	40	40	40
hsa-miR-330-5p-002230	40	40	40	40
hsa-miR-331-000545	30.743	31.836	31.465	31.587
hsa-miR-331-5p-002233	40	40	34.936	35.889
hsa-miR-335-000546	35.501	40	40	35.378
hsa-miR-337-5p-002156	40	40	40	40
hsa-miR-338-3p-002252	40	40	40	40
hsa-miR-339-3p-002184	40	40	40	40
hsa-miR-339-5p-002257	40	40	40	40
hsa-miR-340-002258	40	40	40	40
hsa-miR-155-002623	31.157	33.331	40	40
hsa-let-7b-002619	35.222	40	33.708	40
hsa-miR-342-3p-002260	29.163	34.294	33.753	32.929
hsa-miR-342-5p-002147	40	40	40	40
hsa-miR-345-002186	37.353	35.246	36.956	40
hsa-miR-361-000554	33.816	40	40	40
hsa-miR-362-3p-002117	40	40	40	40
hsa-miR-362-001273	40	40	40	40
hsa-miR-363-001271	30.935	34.367	31.95	32.338
hsa-miR-365-001020	33.673	40	40	35.026
hsa-miR-367-000555	40	40	40	40
hsa-miR-369-3p-000557	40	40	40	40
hsa-miR-369-5p-001021	40	40	40	40
hsa-miR-370-002275	40	40	40	40
hsa-miR-371-3p-002124	40	40	40	40
hsa-miR-372-000560	40	40	40	40
hsa-miR-373-000561	40	40	40	40
hsa-miR-374-000563	40	40	40	35.573
mmu-miR-374-5p-001319	40	40	40	40
hsa-miR-375-000564	40	40	40	40
hsa-miR-376a-000565	40	40	40	40
hsa-miR-376b-001102	40	40	40	40
hsa-miR-377-000566	40	40	40	40
mmu-miR-379-001138	40	40	40	40
hsa-miR-380-3p-000569	40	40	40	40
hsa-miR-381-000571	40	40	40	40
hsa-miR-382-000572	40	40	40	40
hsa-miR-383-000573	40	40	40	40
hsa-miR-409-5p-002331	40	40	40	40
hsa-miR-410-001274	40	36.289	40	40
hsa-miR-411-001610	40	40	40	40
hsa-miR-422a-002297	34.995	34.108	36.87	40
hsa-miR-423-5p-002340	40	40	40	40
hsa-miR-424-000604	40	40	40	40
hsa-miR-425-5p-001516	31.564	32.439	32.174	33.623
hsa-miR-429-001024	40	40	40	40
hsa-miR-431-001979	40	40	40	40
hsa-miR-433-001028	40	32.942	40	40
hsa-miR-449-001030	40	40	40	40
hsa-miR-449b-001608	40	40	40	40
hsa-miR-450a-002303	40	40	40	40
hsa-miR-450b-3p-002208	40	40	40	40
hsa-miR-450b-5p-002207	40	40	40	34.105
mmu-miR-451-001141	40	30.288	33.236	40
hsa-miR-452-002329	40	33.196	40	40
hsa-miR-453-002318	40	40	40	40
hsa-miR-454-002323	40	40	40	40
hsa-miR-455-3p-002244	40	40	40	40
hsa-miR-455-001280	40	40	40	40
hsa-miR-483-5p-002338	31.427	31.822	31.28	31.822
hsa-miR-484-001821	32.898	40	32.54	39.069
hsa-miR-485-3p-001277	36.404	40	33.837	37.131
hsa-miR-485-5p-001036	40	40	40	40
hsa-miR-486-3p-002093	31.011	29.078	29.88	30.387
hsa-miR-486-001278	40	40	40	40
hsa-miR-487a-001279	40	40	40	40
hsa-miR-487b-001285	40	40	40	40
hsa-miR-488-002357	40	40	40	40
hsa-miR-489-002358	38.046	40	40	37.644
hsa-miR-490-001037	40	40	40	40
hsa-miR-491-3p-002360	40	40	40	40
mmu-miR-491-001630	40	40	40	40
hsa-miR-493-002364	40	40	40	40
hsa-miR-494-002365	40	40	40	40
mmu-miR-495-001663	40	40	40	40
mmu-miR-496-001953	40	40	40	40
hsa-miR-499-3p-002427	40	40	40	40
mmu-miR-499-001352	40	40	40	40
hsa-miR-500-002428	40	40	40	40
hsa-miR-501-3p-002435	40	40	40	40
hsa-miR-501-001047	40	40	40	40
hsa-miR-502-3p-002083	40	40	40	40
hsa-miR-502-001109	33.834	36.851	32.812	32.77
hsa-miR-503-001048	40	40	40	40
hsa-miR-504-002084	40	40	40	40
hsa-miR-505-002089	40	40	40	40
hsa-miR-507-001051	40	40	40	40
hsa-miR-508-001052	40	40	40	40
hsa-miR-508-5p-002092	40	40	40	40
hsa-miR-509-5p-002235	40	40	33.03	40
hsa-miR-510-002241	40	40	40	40
hsa-miR-512-3p-001823	40	40	40	40
hsa-miR-512-5p-001145	40	40	40	40
hsa-miR-513-5p-002090	40	40	40	40
hsa-miR-515-3p-002369	40	40	40	40
hsa-miR-515-5p-001112	40	40	40	40
hsa-miR-516a-5p-002416	40	40	40	40
hsa-miR-516b-001150	40	40	40	40
hsa-miR-517a-002402	40	40	40	40
hsa-miR-517c-001153	40	40	40	40
hsa-miR-518a-3p-002397	40	40	40	40
hsa-miR-518a-5p-002396	39.015	40	40	40
hsa-miR-518b-001156	40	40	40	40
hsa-miR-518c-002401	40	40	40	40
hsa-miR-518d-001159	33.957	40	40	33.278
hsa-miR-518d-5p-002389	40	40	40	40
hsa-miR-518e-002395	40	40	40	40
hsa-miR-518f-002388	40	40	40	40
hsa-miR-519a-002415	40	40	40	40
hsa-miR-519d-002403	40	40	40	40
hsa-miR-519e-002370	40	40	34.018	32.907
hsa-miR-520a-001167	40	40	40	40
hsa-miR-520a#-001168	40	40	40	40
hsa-miR-520d-5p-002393	34.301	40	40	40
hsa-miR-520g-001121	40	40	40	40
hsa-miR-521-001122	40	40	40	40
hsa-miR-522-002413	40	40	40	40
hsa-miR-523-002386	40	40	40	40
hsa-miR-524-5p-001982	40	40	40	40
hsa-miR-525-3p-002385	40	40	40	40
hsa-miR-525-001174	40	40	40	40
hsa-miR-526b-002382	40	40	40	40
hsa-miR-532-3p-002355	40	40	40	40
hsa-miR-532-001518	40	40	40	40
hsa-miR-539-001286	40	40	40	40
hsa-miR-541-002201	40	40	40	40
hsa-miR-542-3p-001284	40	40	40	40
hsa-miR-542-5p-002240	40	40	40	40
hsa-miR-544-002265	40	40	40	40
hsa-miR-545-002267	34.983	40	34.096	40
hsa-miR-548a-001538	32.974	40	35.279	40
hsa-miR-548a-5p-002412	40	40	40	40
hsa-miR-548b-001541	40	40	40	40
hsa-miR-548b-5p-002408	40	40	40	40
hsa-miR-548c-001590	40	40	40	40
hsa-miR-548c-5p-002429	40	40	40	40
hsa-miR-548d-001605	40	40	40	40
hsa-miR-548d-5p-002237	33.186	40	40	40
hsa-miR-551b-001535	40	40	40	40
hsa-miR-556-3p-002345	40	40	40	40
hsa-miR-556-5p-002344	40	40	40	40
hsa-miR-561-001528	40	40	40	40
hsa-miR-570-002347	29.522	40	40	40
hsa-miR-574-3p-002349	38.666	34.847	35.242	40
hsa-miR-576-3p-002351	40	40	40	40
hsa-miR-576-5p-002350	40	40	40	40
hsa-miR-579-002398	40	40	40	40
hsa-miR-582-3p-002399	40	40	35.441	40
hsa-miR-582-5p-001983	40	40	40	40
hsa-miR-589-002409	40	40	40	40
hsa-miR-590-5p-001984	34.977	40	40	40
hsa-miR-597-001551	31.504	32.219	31.767	32.875
hsa-miR-598-001988	40	40	40	40
mmu-miR-615-001960	40	40	33.816	40
hsa-miR-615-5p-002353	40	40	40	40
hsa-miR-616-002414	40	40	40	40
hsa-miR-618-001593	35.066	35.932	40	40
hsa-miR-624-002430	40	40	40	40
hsa-miR-625-002431	40	40	40	35.925
hsa-miR-627-001560	35.333	40	40	40
hsa-miR-628-5p-002433	34.277	35.751	40	35.851
hsa-miR-629-002436	40	40	33.506	40
hsa-miR-636-002088	40	34.586	33	40
hsa-miR-642-001592	40	34.947	40	40
hsa-miR-651-001604	40	40	40	40
hsa-miR-652-002352	40	40	40	40
hsa-miR-653-002292	40	40	40	40
hsa-miR-654-3p-002239	40	35.513	40	40
hsa-miR-654-001611	40	40	40	40
hsa-miR-655-001612	40	40	40	40
hsa-miR-660-001515	40	40	40	40
hsa-miR-671-3p-002322	33.933	40	40	40
hsa-miR-672-002327	40	40	40	9.671
hsa-miR-674-002021	40	40	40	40
hsa-miR-708-002341	36.009	36.607	40	38.717
hsa-miR-744-002324	40	40	40	40
hsa-miR-758-001990	40	33.607	33.481	40
hsa-miR-871-002354	40	40	40	40
hsa-miR-872-002264	40	40	40	40
hsa-miR-873-002356	40	40	40	40
hsa-miR-874-002268	40	40	40	40
hsa-miR-875-3p-002204	40	40	40	40
hsa-miR-876-3p-002225	40	40	40	40
hsa-miR-876-5p-002205	40	40	40	40
hsa-miR-885-3p-002372	40	40	40	40
hsa-miR-885-5p-002296	31.31	32.536	34.645	40
hsa-miR-886-3p-002194	35.76	33.859	34.321	33.612
hsa-miR-886-5p-002193	40	40	40	40
hsa-miR-887-002374	40	40	40	40
hsa-miR-888-002212	40	40	40	40
hsa-miR-889-002202	40	40	40	40
hsa-miR-890-002209	40	40	40	40
hsa-miR-891a-002191	29.517	30.137	30.221	30.276
hsa-miR-891b-002210	40	40	40	40
hsa-miR-892a-002195	40	40	40	40
hsa-miR-147-000469	40	40	40	40
hsa-miR-208-000511	40	40	40	40
hsa-miR-211-000514	40	31.802	40	40
hsa-miR-212-000515	31.181	34.549	32.91	33.373
hsa-miR-219-1-3p-002095	40	40	40	40
hsa-miR-219-2-3p-002390	40	40	40	35.134
hsa-miR-220-000523	40	40	33.531	40
hsa-miR-220b-002206	36.123	40	40	40
hsa-miR-220c-002211	40	40	40	40
hsa-miR-298-002190	40	40	40	40
hsa-miR-325-000540	40	40	40	40
hsa-miR-346-000553	36.492	40	40	40
hsa-miR-376c-002122	40	40	40	40
hsa-miR-384-000574	40	40	40	40
hsa-miR-412-001023	35.171	34.117	40	40
hsa-miR-448-001029	40	40	40	40
hsa-miR-492-001039	40	40	40	40
hsa-miR-506-001050	40	40	40	40
hsa-miR-509-3-5p-002155	40	40	40	40
hsa-miR-511-001111	40	40	40	40
hsa-miR-517b-001152	40	40	40	40
hsa-miR-519c-001163	40	40	40	40
hsa-miR-520b-001116	40	40	40	40
hsa-miR-520e-001119	40	40	40	40
hsa-miR-520f-001120	40	40	40	40

## Sheet: Sera samples cards A+B
Target Name	N002_Ct	N007_Ct	N009_Ct	N013_Ct	N014_Ct	N062_Ct	N073_Ct	N082_Ct	N166_Ct	N176_Ct	N177_Ct	N27_Ct	N32_Ct	N33_Ct	N37_Ct	N39_Ct
RNU44-4373384	40	40	40	40	40	40	40	40	40	40	40	40	40	40	40	40
RNU48-4373383	40	40	30.4334	40	40	29.7849	28.4847	40	40	30.906	29.9673	40	31.9961	34.1978	30.8286	30.3637
ath-miR159a-4373390	26.4108	21.6591	20.3072	24.3568	25.8943	20.2184	21.7165	26.4975	27.1358	20.3482	20.7752	22.7007	21.6981	22.3959	22.8988	21.4117
hsa-let-7a-4373169	40	26.3506	29.0916	40	40	24.5904	27.5455	40	40	24.1914	24.8949	40	25.8643	28.1499	28.3775	28.646
hsa-let-7b-4395446	40	23.7672	26.4409	40	40	21.5894	25.9317	40	40	24.8464	25.618	26.8831	25.5014	26.8741	27.6157	26.1413
hsa-let-7c-4373167	40	31.5702	31.1904	40	40	28.3758	32.0238	40	40	28.7473	29.3984	31.5765	30.9689	40	33.1141	31.6299
hsa-let-7d-4395394	31.2099	24.8116	26.249	30.6645	32.0084	24.36	26.4208	34.8467	40	24.506	24.9961	27.3755	26.0094	27.6616	28.4344	26.4672
hsa-let-7e-4395517	30.7533	24.1162	25.0591	29.1895	31.6345	22.5407	25.3726	32.4457	34.5334	22.3489	24.5199	26.1496	25.1752	25.9508	25.0598	26.0948
hsa-let-7f-4373164	40	40	33.3869	40	40	40	40	40	40	40	40	40	29.7775	40	40	40
hsa-let-7g-4395393	32.4634	25.0467	27.5131	40	36.3947	24.706	27.8354	40	33.2483	26.5007	26.622	29.6334	27.6967	28.5946	29.0091	28.4362
hsa-miR-1-4395333	40	40	40	40	40	40	40	40	40	40	40	40	40	40	40	40
hsa-miR-100-4373160	40	28.1935	30.6376	40	40	26.0101	30.9644	40	40	27.6669	27.5251	28.6779	28.9959	29.164	30.7594	27.4521
hsa-miR-101-4395364	40	27.3072	31.4704	40	40	29.3298	29.3145	40	40	29.0132	29.8261	40	31.104	32.2345	32.8625	32.6878
hsa-miR-103-4373158	40	25.7838	28.4986	40	40	26.6104	29.3891	40	40	27.332	27.4864	30.9101	28.0457	30.7643	28.9713	30.6216
hsa-miR-105-4395278	40	40	40	40	40	40	40	40	40	40	40	40	40	40	40	40
hsa-miR-106a-4395280	27.6299	21.8212	22.8559	26.8821	28.2605	20.3437	22.1428	28.7041	28.7374	20.9154	21.1044	23.7064	22.483	23.3457	23.8156	21.3417
hsa-miR-106b-4373155	29.2376	24.2577	25.0563	27.5226	30.524	23.2585	24.5746	29.2707	30.025	23.6983	23.8968	26.943	25.3671	25.579	25.9501	24.6074
hsa-miR-107-4373154	40	40	40	40	40	31.3967	40	40	40	32.478	31.0809	40	33.4776	40	40	40
hsa-miR-10a-4373153	34.5333	28.5695	30.3015	40	35.9392	32.7456	30.7471	40	40	31.3882	30.8276	32.1985	33.3071	33.8823	40	31.9602
hsa-miR-10b-4395329	40	40	40	40	40	40	40	40	40	40	40	40	40	40	40	40
hsa-miR-122-4395356	40	40	29.4257	40	31.1464	28.6605	28.9481	40	40	30.6724	33.418	27.2831	30.1253	30.0211	31.432	28.1591
hsa-miR-124-4373295	40	40	40	40	40	31.6619	40	40	40	32.429	35.6759	32.246	33.5826	40	40	40
hsa-miR-125a-3p-4395310	40	40	40	40	40	40	34.2191	40	40	40	40	40	40	40	40	40
hsa-miR-125a-5p-4395309	40	27.2065	29.5102	30.8516	34.2216	26.8426	28.8898	32.6555	40	27.8587	27.8845	29.763	28.628	30.2758	30.2164	29.6698
hsa-miR-125b-4373148	40	27.6493	28.9617	32.6989	40	28.4002	28.7533	40	40	28.3863	28.5282	30.2391	30.0803	29.053	32.4833	30.1975
hsa-miR-126-4395339	27.2547	21.5565	22.0539	26.1094	27.5095	20.9995	22.0252	28.0468	28.0674	21.1325	21.2973	23.6796	22.6791	22.9802	23.1962	21.9124
hsa-miR-127-3p-4373147	34.2211	26.921	29.2474	30.8174	40	26.6668	30.6639	40	40	27.0176	27.0386	30.8559	28.644	40	30.7548	29.1016
hsa-miR-127-5p-4395340	40	40	40	40	40	40	40	40	40	40	40	40	40	40	40	40
hsa-miR-128-4395327	31.8073	27.7307	30.7639	40	33.092	26.9152	29.3143	35.9354	36.7017	26.9678	27.1301	30.6268	27.7792	29.9783	28.7198	29.0926
hsa-miR-129-3p-4373297	40	40	40	40	40	40	40	40	40	40	40	40	40	40	40	40
hsa-miR-129-5p-4373171	40	40	40	40	40	40	40	40	40	40	40	40	40	40	40	40
hsa-miR-130a-4373145	32.5395	24.8237	26.8123	31.6686	32.5635	23.1196	26.3742	32.4112	32.5081	23.2374	23.663	27.5245	24.7059	27.0419	27.7484	27.5063
hsa-miR-130b-4373144	31.3346	26.3156	26.7059	40	32.7683	24.8398	26.5402	40	40	25.0255	24.9048	28.2234	26.5667	29.7522	28.4799	28.497
hsa-miR-132-4373143	40	27.8736	27.2328	40	40	24.7345	26.5391	40	40	26.5422	26.6972	28.9426	27.0147	27.888	28.0599	25.4095
hsa-miR-133a-4395357	40	29.9833	30.5933	31.741	40	28.4125	30.1441	40	40	27.5068	28.9976	29.8555	30.9426	30.7963	30.7097	30.1038
hsa-miR-133b-4395358	40	40	34.3075	40	40	33.2955	40	40	40	40	32.2391	32.8864	32.5264	33.2311	35.9243	40
hsa-miR-134-4373299	40	27.6322	32.9398	40	40	27.1776	33.5309	40	40	27.2727	27.873	29.0878	28.236	32.1376	33.5796	30.1552
hsa-miR-135a-4373140	40	31.7516	32.7637	40	40	30.4967	40	40	40	31.5204	33.7246	40	31.4472	40	40	40
hsa-miR-135b-4395372	40	40	40	40	40	40	40	40	40	40	40	34.0288	40	40	35.7931	40
hsa-miR-136-4373173	38.0515	40	40	40	40	36.8573	40	40	40	40	40	40	40	40	40	36.7414
hsa-miR-137-4373301	40	40	40	40	40	40	40	40	40	40	40	40	40	40	40	40
hsa-miR-138-4395395	34.444	40	34.6725	40	36.1967	33.7169	35.0786	40	33.6729	33.3728	33.8218	30.7807	33.8768	40	40	40
hsa-miR-139-3p-4395424	40	32.7666	33.7087	40	40	29.3771	40	40	40	30.2807	28.464	31.0282	32.1034	40	32.2335	31.0284
hsa-miR-139-5p-4395400	40	26.1434	27.4733	31.2783	40	25.4446	27.6589	40	33.5244	26.0682	26.0778	29.2811	27.0184	27.6248	28.2988	26.866
hsa-miR-140-3p-4395345	35.9854	30.1819	32.7125	33.6584	36.1826	31.5234	32.5112	35.8445	40	31.466	32.234	40	32.1771	32.5948	34.8865	32.2777
hsa-miR-140-5p-4373374	32.8079	28.4025	29.1385	35.8441	34.0934	28.4603	28.0941	40	40	29.1649	28.8592	32.208	30.1053	30.8072	40	29.6926
hsa-miR-141-4373137	40	32.7577	40	32.5081	40	40	40	40	40	40	40	40	40	40	40	40
hsa-miR-142-3p-4373136	31.3337	25.0749	26.5373	31.0863	32.2902	26.149	26.0597	34.5314	32.215	26.7861	27.3562	27.9755	28.5088	28.3454	29.0117	27.7626
hsa-miR-142-5p-4395359	40	40	34.6826	40	40	33.3392	34.6675	40	40	32.248	32.8454	40	32.4173	40	40	40
hsa-miR-143-4395360	40	29.8055	29.1913	31.4086	40	29.2974	31.6422	40	40	30.8955	28.1687	30.1799	31.4277	40	30.9636	31.5909
hsa-miR-145-4395389	30.0456	25.0782	26.7815	28.2737	30.8745	24.7122	27.2969	31.8166	30.9893	25.069	25.0887	26.9641	25.913	27.3451	27.6955	26.439
hsa-miR-146a-4373132	26.463	19.3437	21.4675	25.0576	27.5486	20.0635	21.4813	27.2001	27.9591	19.8514	20.1127	22.8341	21.271	23.0372	22.3828	22.0522
hsa-miR-146b-3p-4395472	40	40	40	40	40	40	40	40	40	40	40	40	40	33.3578	40	40
hsa-miR-146b-5p-4373178	29.6652	24.1998	25.7284	29.6955	31.6986	24.0509	25.5783	32.0362	33.0693	24.1734	24.4082	27.5161	25.3975	27.1869	27.4129	26.3295
hsa-miR-147-4373131	40	40	40	40	40	40	40	40	40	40	40	40	40	40	40	40
hsa-miR-147b-4395373	40	40	40	40	40	40	40	40	40	40	40	40	40	40	40	40
hsa-miR-148a-4373130	31.9563	26.9205	26.9322	30.7235	34.1819	26.4996	26.3932	33.0685	30.2	26.3608	26.2591	29.0125	27.629	28.4213	29.5363	27.6322
hsa-miR-148b-4373129	31.9299	28.9943	28.7852	33.986	40	27.112	28.3897	40	35.5411	27.3789	27.6459	40	29.5378	30.9175	30.5692	28.9525
hsa-miR-149-4395366	40	40	40	40	40	40	40	40	40	40	40	40	40	40	40	40
hsa-miR-150-4373127	26.832	21.8348	22.4808	25.7254	27.1034	21.2803	22.5855	27.003	27.4125	21.0425	21.7662	23.0089	23.3254	22.1691	22.3739	22.3601
hsa-miR-152-4395170	32.5076	26.8498	26.388	40	31.6203	24.4351	26.3528	40	33.6522	24.7758	24.7276	27.9187	26.3473	28.3669	28.1624	26.3909
hsa-miR-153-4373305	40	40	40	40	40	40	40	40	40	40	40	40	40	40	40	40
hsa-miR-154-4373270	40	40	40	40	40	40	40	40	40	40	40	40	40	40	40	40
has-miR-155-4395459	40	27.3388	29.5265	40	40	27.8298	29.9453	40	40	31.7047	40	29.1694	31.7645	29.7514	29.8745	28.814
hsa-miR-15a-4373123	40	40	31.9905	40	40	40	34.6568	40	40	40	35.6625	40	40	40	40	29.6247
hsa-miR-15b-4373122	29.1999	23.1865	24.5563	27.9764	29.5109	40	23.876	30.3448	30.1236	22.6955	23.3196	25.0074	23.7222	24.5151	25.0355	23.6685
hsa-miR-16-4373121	25.3408	19.8436	21.5089	24.701	25.4008	19.97	19.8751	26.0536	26.5009	20.1453	20.3126	23.0148	21.7066	22.2376	22.8752	21.8865
hsa-miR-17-4395419	27.5723	22.1006	23.2681	27.7373	28.1312	21.0189	22.2333	28.8669	27.87	21.0718	21.2933	23.9476	22.5461	23.0938	23.7566	23.0678
hsa-miR-181a-4373117	40	28.4007	30.0961	40	40	27.5573	30.2895	40	40	27.969	28.2676	31.6842	29.899	30.3465	31.842	30.5679
hsa-miR-181c-4373115	40	37.2115	40	40	40	33.6764	40	40	40	40	40	40	40	40	40	40
hsa-miR-182-4395445	40	40	36.9405	40	40	34.1406	40	40	40	36.5554	35.1298	40	33.6986	40	40	40
hsa-miR-183-4395380	40	40	35.9794	40	40	33.4048	40	40	40	40	40	40	40	40	40	33.7041
hsa-miR-184-4373113	40	29.3657	30.976	40	40	25.6383	36.4201	40	40	25.9781	26.2748	28.3829	27.5408	30.8228	30.6572	29.0672
hsa-miR-185-4395382	32.5792	27.4626	28.4608	40	33.6127	27.017	27.9273	32.042	40	27.3811	27.5474	31.0018	28.7331	30.0929	29.5317	30.5116
hsa-miR-186-4395396	34.1618	26.0847	27.2485	32.3592	31.0677	26.5605	26.3269	31.2866	34.5963	26.2175	26.7226	29.0073	27.6436	27.9778	29.4525	28.0228
hsa-miR-187-4373307	40	40	40	40	40	40	40	40	40	40	40	40	40	40	40	40
hsa-miR-188-3p-4395217	40	40	40	40	40	40	40	40	40	40	40	40	40	40	40	40
hsa-miR-18a-4395533	40	28.3602	30.4581	40	40	30.3442	31.2204	40	40	31.5197	31.0973	30.0405	30.4175	30.1762	31.2366	28.6583
hsa-miR-18b-4395328	40	40	40	40	40	40	40	40	40	40	40	40	40	40	40	40
hsa-miR-190-4373110	40	30.8837	40	40	40	34.0005	40	40	40	40	40	40	40	40	40	31.4638
hsa-miR-191-4395410	26.7185	21.2948	22.9187	25.355	27.9011	20.8748	22.2492	27.3885	27.4295	21.1312	21.0572	23.8817	22.5143	23.4365	23.9673	22.6874
hsa-miR-192-4373108	31.892	25.7046	27.6987	31.0833	33.3577	24.2556	26.5296	32.9259	31.8734	24.6954	24.7741	27.5681	26.1046	27.4912	27.8987	26.2623
hsa-miR-193a-3p-4395361	38.4201	40	40	40	36.8972	40	40	40	40	40	40	40	40	40	40	40
hsa-miR-193a-5p-4395392	40	31.7895	31.0578	40	40	27.1593	28.9412	40	40	27.5478	27.9472	29.7039	29.0212	28.8081	34.8361	28.1831
hsa-miR-193b-4395478	31.0081	32.4464	31.3136	32.5297	36.0386	29.7424	31.2833	40	37.5005	29.5915	31.4759	31.1775	31.2078	32.3571	40	30.3918
hsa-miR-194-4373106	40	23.1133	27.2836	30.5362	34.9021	25.6626	27.044	40	36.4224	26.4275	26.7398	29.9418	28.146	30.5678	30.3581	29.3557
hsa-miR-195-4373105	31.2921	24.9746	25.8347	29.7373	30.7189	23.3449	23.9516	32.2441	31.1002	24.2088	25.0135	27.8252	25.9413	26.7863	27.0161	25.9952
hsa-miR-196b-4395326	40	40	40	40	40	40	40	40	40	40	40	40	40	40	40	40
hsa-miR-197-4373102	31.8575	23.8877	27.2013	29.1805	31.831	24.8871	26.9105	30.8581	31.6342	23.9515	24.5842	27.8407	25.7724	27.7906	26.1168	26.775
hsa-miR-198-4395384	40	33.6927	35.6567	40	40	40	40	40	40	33.3532	33.6684	36.6583	32.9988	40	40	31.6227
hsa-miR-199a-3p-4395415	31.3198	25.663	26.7832	30.1903	33.814	26.2384	28.0001	32.1967	32.6189	26.39	26.7354	29.3237	27.448	28.2137	29.1799	28.0017
hsa-miR-199a-5p-4373272	40	31.0802	40	40	36.1264	30.1058	40	40	40	29.994	28.9584	40	31.1291	30.7986	40	40
hsa-miR-199b-5p-4373100	40	40	40	40	36.9397	32.361	40	40	40	33.6359	33.4647	40	40	33.4723	40	40
hsa-miR-19a-4373099	30.7896	27.1214	28.1122	30.5944	32.1252	26.1332	27.7293	40	34.3636	26.2945	26.718	31.2191	28.2255	29.0269	29.2908	27.8666
hsa-miR-19b-4373098	27.3037	21.801	22.7891	25.2439	27.4942	18.8545	22.3121	27.4063	28.1202	20.8245	20.931	24.0012	22.2811	23.1126	23.5094	22.3407
hsa-miR-200a-4378069	40	40	40	40	40	40	40	40	40	40	40	40	34.1962	40	40	40
hsa-miR-200b-4395362	40	40	40	40	40	40	40	40	40	40	40	40	40	40	40	40
hsa-miR-200c-4395411	40	29.3488	40	40	40	40	33.9111	40	40	31.4913	35.6269	32.8085	32.0539	40	32.1802	35.7147
hsa-miR-202-4395474	40	29.5988	28.6295	30.5903	30.7109	27.1424	29.8895	33.0225	30.7469	27.7189	27.9084	29.1311	30.5923	30.5683	30.0272	28.1903
hsa-miR-203-4373095	40	30.1569	28.1889	40	40	40	28.4121	40	35.0595	40	40	40	40	30.8034	40	31.5242
hsa-miR-204-4373094	32.5278	32.3488	34.5587	32.7695	40	29.1438	40	40	40	30.4203	30.4771	33.4437	31.1317	34.955	40	31.7975
hsa-miR-205-4373093	40	40	30.173	40	40	40	33.371	40	35.2565	40	40	40	40	40	40	40
hsa-miR-208-4373091	40	30.2611	30.2589	40	40	32.2442	28.1056	40	40	40	40	40	40	40	40	40
hsa-miR-208b-4395401	40	40	40	40	40	40	40	40	40	40	40	40	40	40	40	40
hsa-miR-20a-4373286	27.759	21.8877	22.6966	27.3187	28.1703	20.798	21.8386	27.8516	27.2755	20.7118	20.8782	23.9615	22.2086	22.7135	23.0422	20.3868
hsa-miR-20b-4373263	30.6766	25.6601	27.5341	30.755	32.4755	24.4985	26.1301	34.6241	32.5912	25.0262	25.8182	27.673	26.161	27.5965	27.7917	27.1582
hsa-miR-21-4373090	28.5943	23.009	23.9617	27.8845	28.5917	21.2982	23.0435	28.6397	29.7186	21.6281	22.3458	24.8457	23.3206	24.2578	24.2401	23.8119
hsa-miR-210-4373089	40	40	40	40	40	34.9556	40	40	40	40	40	40	36.6142	40	40	40
hsa-miR-211-4373088	40	40	40	40	40	40	40	40	40	40	40	40	40	40	32.0894	40
hsa-miR-212-4373087	35.4341	29.738	31.6734	31.3257	32.8257	29.7763	29.836	40	35.3283	28.6131	30.1007	32.641	29.5352	31.1626	32.5438	33.6224
hsa-miR-214-4395417	40	40	40	40	40	35.7521	40	40	40	40	40	40	40	40	40	35.0123
hsa-miR-215-4373084	40	29.5841	32.0876	33.7862	40	40	32.487	34.1279	40	29.1519	30.6822	40	32.514	40	32.0688	29.3172
hsa-miR-216a-4395331	40	40	36.2948	40	40	40	40	40	40	40	40	40	40	40	40	40
hsa-miR-216b-4395437	40	40	40	40	40	40	40	40	40	40	40	40	40	40	40	40
hsa-miR-217-4395448	40	40	40	40	40	40	40	40	40	40	40	40	40	40	40	40
hsa-miR-218-4373081	40	40	30.4353	40	40	29.2328	40	40	32.3529	29.3543	29.2901	34.8255	31.1534	40	40	36.4442
hsa-miR-219-1-3p-4395206	40	40	40	40	40	40	40	40	40	40	40	40	40	40	40	40
hsa-miR-219-2-3p-4395501	40	31.1206	33.3697	40	40	34.4886	40	40	40	33.0792	40	40	31.7461	40	40	40
hsa-miR-219-5p-4373080	40	40	40	40	40	40	40	40	40	40	40	40	40	40	40	40
hsa-miR-22-4373079	40	40	40	40	40	40	40	40	40	40	40	40	40	40	40	40
hsa-miR-220-4373078	40	28.2595	27.901	40	40	40	29.5514	40	40	30.7683	30.5821	31.2619	30.7874	30.5099	30.3805	29.8732
hsa-miR-220b-4395317	40	40	40	40	40	40	40	40	40	40	40	40	40	40	40	40
hsa-miR-220c-4395322	40	40	40	40	40	40	40	40	40	40	40	40	40	40	40	40
hsa-miR-221-4373077	40	23.3286	25.1929	40	40	22.8964	25.0269	32.9903	40	22.4057	22.6183	25.9495	24.1109	25.8897	25.9737	25.5732
hsa-miR-222-4395387	29.4031	24.3716	25.0934	29.6578	29.1168	23.1405	23.8264	31.0782	31.8569	23.2196	23.314	25.379	24.5044	24.63	25.0189	24.9814
hsa-miR-223-4395406	21.7631	16.4843	17.6619	20.3032	22.2642	15.1637	16.3572	22.11	21.8754	15.4733	15.4043	18.0723	16.9625	18.1071	18.56	17.2001
hsa-miR-224-4395210	40	29.3568	30.822	40	40	28.5593	40	40	40	28.4833	27.9997	32.6358	29.7453	30.3078	32.6437	40
hsa-miR-23a-4373074	40	28.859	31.0628	40	40	27.4087	29.7907	40	40	30.0855	30.6856	34.3146	30.6429	31.2706	40	40
hsa-miR-23b-4373073	40	40	40	40	40	40	40	40	40	40	40	40	40	40	40	40
hsa-miR-24-4373072	29.3332	23.5466	23.9134	27.6704	29.1078	21.5022	23.1362	28.6342	29.5738	22.1456	22.1787	24.6764	23.8545	23.799	23.728	23.6852
hsa-miR-25-4373071	27.5514	24.1265	24.9295	28.1581	28.7559	22.1341	23.0822	30.2317	29.2726	22.305	22.4588	25.0215	23.8069	23.6296	24.1271	23.4844
hsa-miR-26a-4395166	30.0571	23.0473	24.5595	28.4249	29.8837	23.0472	24.5371	30.0896	30.8363	23.4362	23.7167	26.3774	24.9695	25.8074	26.3419	25.9174
hsa-miR-26b-4395167	29.4934	24.6425	25.966	30.0439	31.9418	25.1308	25.6835	30.6058	34.4823	24.9775	25.2775	28.4459	26.7696	26.9501	27.2464	25.9197
hsa-miR-27a-4373287	31.7566	25.3027	26.0935	28.5024	31.5902	23.1001	25.4744	31.1403	30.9401	23.2807	23.9807	26.3533	25.3778	26.471	27.2946	26.9465
hsa-miR-27b-4373068	32.9513	25.91	27.6481	40	31.7067	24.4925	26.8388	33.9056	33.7284	24.8675	24.9709	27.8828	26.5216	28.3026	28.5853	27.673
hsa-miR-28-3p-4395557	32.1985	27.0109	28.1743	33.2571	40	26.5375	28.1173	40	40	25.7167	27.0831	32.0652	28.8749	28.6744	29.7929	28.9719
hsa-miR-28-5p-4373067	33.1857	29.6465	29.2923	40	32.9964	27.158	28.5534	33.795	40	27.6942	27.6716	31.0751	29.4282	29.7509	29.1428	29.6018
hsa-miR-296-3p-4395212	40	32.1599	40	40	40	40	40	40	40	40	40	40	40	40	40	34.2758
hsa-miR-296-5p-4373066	32.9211	27.6621	28.8757	32.7818	33.4788	29.6739	28.8798	33.247	34.4716	29.8384	29.7723	30.5428	31.5383	30.5297	30.3036	29.1128
hsa-miR-298-4395301	40	40	40	40	40	40	40	40	40	40	40	40	40	40	40	40
hsa-miR-299-3p-4373189	40	40	40	40	40	40	40	40	40	40	40	40	40	34.9612	40	40
hsa-miR-299-5p-4373188	40	40	40	40	40	40	40	40	40	40	40	40	40	40	40	34.098
hsa-miR-29a-4395223	32.074	27.0362	26.9009	31.4148	40	26.4199	27.0967	32.0965	40	26.614	26.9476	27.6925	28.3546	28.2859	28.1128	28.0871
hsa-miR-29b-4373288	40	28.7383	32.1715	40	40	31.2888	34.8119	40	40	30.3283	30.2672	40	31.9016	31.1614	30.6347	40
hsa-miR-29c-4395171	40	29.6345	29.9692	35.5378	40	27.5956	30.2894	40	40	28.4505	29.0792	32.1734	30.1349	30.9133	31.5201	29.9654
hsa-miR-301a-4373064	34.2261	28.5885	28.7667	32.29	40	26.8197	28.2478	33.6242	33.952	27.3854	27.3593	31.1833	29.6689	28.9363	29.9059	30.5387
hsa-miR-301b-4395503	40	31.9965	40	40	40	30.0405	32.3853	40	40	30.8745	32.7369	40	32.1366	40	32.1947	40
hsa-miR-302a-4378070	40	40	40	40	40	34.0281	40	40	40	40	40	40	40	40	40	40
hsa-miR-302b-4378071	40	34.3407	40	40	40	40	40	40	40	40	40	40	40	34.0575	40	40
hsa-miR-302c-4378072	40	40	40	40	40	34.5908	32.076	40	40	40	33.789	40	40	40	40	40
hsa-miR-30b-4373290	26.8218	21.5708	21.9386	25.7929	27.227	20.3709	22.2	27.6334	27.9684	20.5011	20.6673	23.3015	22.1847	22.8494	23.6243	22.7393
hsa-miR-30c-4373060	27.8057	22.9703	23.8748	26.351	28.0275	21.0319	23.0869	28.1307	27.9975	21.1164	21.5703	23.6846	22.8304	23.4046	23.5309	22.8472
hsa-miR-31-4395390	40	40	40	40	40	33.3905	40	40	40	33.055	34.4265	40	40	40	33.5611	40
hsa-miR-32-4395220	40	40	40	40	40	40	32.5515	40	40	40	40	40	40	40	40	40
hsa-miR-320-4395388	28.2167	23.8497	24.5846	28.0407	28.9631	22.9909	22.7802	28.6816	28.7502	23.0214	23.0612	26.1845	24.4283	24.782	25.6006	24.5806
hsa-miR-323-3p-4395338	32.2646	28.7541	31.9592	30.9288	31.778	27.8175	31.1824	32.687	40	28.0639	28.4269	31.1433	29.1681	32.5377	31.3408	30.0147
hsa-miR-324-3p-4395272	35.062	31.4552	31.3074	34.5477	34.2381	29.9258	29.9828	38.2247	40	30.6576	30.8767	33.6241	31.2087	33.8301	32.3957	30.5209
hsa-miR-324-5p-4373052	40	28.9662	30.7177	33.4087	40	28.6196	29.7152	32.908	31.9109	30.6154	29.0796	30.4088	32.1405	29.8293	40	31.6384
hsa-miR-325-4373051	40	40	40	40	40	40	40	40	40	40	40	40	40	40	40	40
hsa-miR-326-4373050	40	40	40	40	40	40	40	40	40	40	40	40	40	40	40	40
hsa-miR-328-4373049	30.9435	25.0486	27.1028	28.848	31.6509	24.2282	26.2849	30.8022	31.0699	24.6119	24.8586	27.7144	26.0273	26.7422	27.5627	27.4806
hsa-miR-329-4373191	40	30.1664	32.8234	40	40	31.7841	32.9377	40	37.6097	31.1403	31.3431	37.5025	34.0814	40	40	34.6441
hsa-miR-330-3p-4373047	40	34.3929	40	40	40	33.8696	40	40	40	33.3525	33.4019	35.6189	36.3234	40	32.847	40
hsa-miR-330-5p-4395341	40	40	40	40	40	40	40	40	40	40	40	40	40	40	40	40
hsa-miR-331-3p-4373046	32.0665	26.4553	27.3917	28.6617	40	24.9241	27.0145	31.2832	32.5152	25.2764	25.3592	28.3183	27.0036	27.1552	27.0157	25.7344
hsa-miR-331-5p-4395344	40	40	32.1667	33.5462	40	30.8843	40	33.0251	40	30.2544	32.6904	40	32.2125	34.8857	31.2868	40
hsa-miR-335-4373045	32.8504	27.163	27.5586	29.1155	31.4179	25.9611	27.7614	33.9293	32.9822	26.0752	26.0459	29.0113	27.4925	27.8711	28.7019	27.7048
hsa-miR-337-5p-4395267	40	29.8114	40	40	40	40	40	40	40	31.1167	40	40	32.4216	40	40	40
hsa-miR-338-3p-4395363	40	40	40	40	40	40	33.1272	40	40	40	40	40	40	40	31.6056	40
hsa-miR-339-3p-4395295	40	31.2838	37.1806	40	40	34.2383	40	40	40	33.3778	31.5828	40	40	40	34.2324	34.3562
hsa-miR-339-5p-4395368	40	33.9301	40	40	40	40	40	40	40	40	40	40	40	40	40	34.5331
hsa-miR-33b-4395196	40	40	40	40	40	40	40	40	40	40	40	40	40	40	40	40
hsa-miR-340-4395369	32.8783	28.4206	29.6556	31.2634	40	27.7635	28.6849	33.0729	33.5516	27.7784	28.0655	29.2672	29.3127	32.2539	30.8089	29.1008
hsa-miR-342-3p-4395371	30.1093	23.446	26.3369	28.5638	30.0525	23.109	24.5842	29.9695	30.2224	23.4206	23.7802	25.4245	24.8811	25.3869	26.141	25.4445
hsa-miR-342-5p-4395258	40	40	40	40	40	40	40	40	40	40	40	40	40	40	40	40
hsa-miR-345-4395297	33.963	30.5221	32.2937	40	33.5984	28.0888	29.2849	40	33.161	27.8812	28.679	30.0583	29.6609	29.9057	29.5056	28.7308
hsa-miR-346-4373038	36.2893	31.6445	40	30.3309	35.4032	29.396	30.9569	33.4601	40	29.0184	29.0918	32.9765	30.1612	40	28.7309	30.3694
hsa-miR-34a-4395168	40	24.6779	28.0033	40	40	26.6941	26.6015	40	40	27.8792	28.66	29.6914	29.5554	40	30.2667	29.9394
hsa-miR-34c-5p-4373036	40	40	32.1662	40	40	40	30.843	40	37.762	40	40	35.6571	40	31.7703	40	40
hsa-miR-361-5p-4373035	40	28.0799	28.6429	40	33.0304	25.7908	28.3093	40	40	26.8839	26.7599	31.7403	27.6713	29.2987	31.5666	28.3704
hsa-miR-362-3p-4395228	34.4285	31.9787	33.5907	40	40	40	40	40	40	40	40	40	40	40	40	40
hsa-miR-362-5p-4378092	40	32.8593	40	40	40	40	40	40	40	40	40	40	40	40	40	40
hsa-miR-363-4378090	40	28.9817	28.8128	40	40	26.2471	28.3738	40	40	26.9971	27.2514	30.7745	29.2302	30.9212	28.9137	27.8198
hsa-miR-365-4373194	34.3324	29.0387	31.5449	31.9449	33.6924	28.0571	29.8729	34.5602	35.2269	29.1533	28.9789	30.4993	29.2386	30.951	30.9554	29.4401
hsa-miR-367-4373034	31.3466	40	40	40	40	33.981	33.5968	40	40	34.9801	34.0049	40	40	40	37.2837	32.8501
hsa-miR-369-3p-4373032	40	32.072	40	40	40	40	40	40	40	40	40	40	40	40	40	40
hsa-miR-369-5p-4373195	40	40	33.7328	40	40	40	40	40	40	40	40	40	40	40	40	40
hsa-miR-370-4395386	40	28.8087	40	40	40	27.61	31.1174	40	40	30.3107	29.0567	40	30.2059	40	40	40
hsa-miR-371-3p-4395235	40	40	40	40	40	40	40	40	40	40	40	40	40	40	40	40
hsa-miR-372-4373029	40	31.948	31.8564	40	40	40	29.8503	40	40	40	32.5473	40	34.6186	32.8302	40	33.969
hsa-miR-373-4378073	40	29.9315	40	40	40	40	31.345	40	40	34.3038	40	40	40	40	40	40
hsa-miR-374a-4373028	30.8511	25.408	26.8313	34.6617	33.1684	25.0507	25.5954	33.6238	32.9013	25.704	25.7578	29.6685	27.3552	27.7514	26.6546	26.6343
hsa-miR-374b-4381045	32.6739	26.3344	27.3384	30.7033	33.3386	26.6534	26.0367	30.3992	32.3355	26.5914	26.3457	31.6665	27.9025	28.3833	28.3458	28.831
hsa-miR-375-4373027	30.7321	28.342	28.9282	40	40	26.1869	26.5136	40	40	26.5331	26.809	40	28.0863	27.8155	28.4173	24.6847
hsa-miR-376a-4373026	37.8352	27.2953	30.9356	31.859	40	25.7676	31.2739	34.0976	34.2441	26.3799	26.3715	28.9216	27.5034	30.4223	30.0566	26.3051
hsa-miR-376b-4373196	40	40	40	40	40	40	40	40	40	40	40	40	40	40	40	40
hsa-miR-376c-4395233	35.7207	26.0547	30.4461	32.6247	37.8411	25.9664	29.0222	38.4621	40	26.1925	26.3825	29.9042	27.6451	31.6071	31.0429	27.8268
hsa-miR-377-4373025	40	40	40	40	40	40	40	40	40	40	40	40	40	40	40	40
hsa-miR-379-4373349	40	31.7186	40	40	40	30.5334	40	40	40	32.2006	40	34.2651	29.153	40	40	40
hsa-miR-380-4373022	40	40	40	40	40	40	40	40	40	40	40	40	40	40	40	40
hsa-miR-381-4373020	40	40	40	40	40	40	40	40	40	40	40	40	40	33.1688	40	40
hsa-miR-382-4373019	40	40	40	40	40	25.3468	40	40	40	25.3111	27.8665	28.578	27.4754	40	40	28.8946
hsa-miR-383-4373018	40	40	40	40	40	40	40	40	40	34.4718	34.7568	40	40	40	40	35.9657
hsa-miR-384-4373017	40	40	40	40	40	40	40	40	40	40	40	40	40	40	40	40
hsa-miR-409-5p-4395442	40	40	40	32.8905	40	40	40	40	40	40	40	40	40	40	40	40
hsa-miR-410-4378093	36.9131	29.5977	32.1154	40	40	27.5706	31.9353	40	40	27.8134	28.2457	40	29.7534	33.0972	37.362	31.3307
hsa-miR-411-4381013	40	29.8207	40	40	40	29.9544	40	40	40	30.425	29.7928	33.2631	31.9238	40	40	30.0344
hsa-miR-412-4373199	40	40	40	40	40	40	34.9395	40	40	40	40	40	40	40	40	34.35
hsa-miR-422a-4395408	37.2347	40	33.5568	40	40	30.3771	32.4727	40	40	30.3358	31.5638	36.9472	34.9613	33.0996	32.3593	32.7382
hsa-miR-423-5p-4395451	31.7332	25.5336	27.4615	30.8039	32.9792	25.7363	26.5282	31.7751	31.477	25.9464	26.0103	28.2702	27.2011	28.4118	28.7099	29.3555
hsa-miR-424-4373201	40	40	40	40	40	30.6566	40	40	40	30.875	30.4397	32.7903	31.9063	32.4298	40	29.8088
hsa-miR-425-4380926	33.4455	26.8163	28.8245	31.2436	40	25.5927	28.0419	35.8169	40	25.3799	25.8291	28.9194	27.7587	28.983	28.968	28.004
hsa-miR-429-4373203	40	40	40	40	40	40	40	40	40	40	40	40	40	40	40	40
hsa-miR-431-4395173	40	40	40	40	40	40	40	40	40	40	40	40	40	40	40	31.7896
hsa-miR-433-4373205	40	27.8503	30.7085	40	40	27.3602	29.2952	33.8562	40	28.132	27.7844	31.9461	29.0679	32.3632	30.7997	29.1372
hsa-miR-448-4373206	40	40	40	40	40	40	40	40	40	40	40	40	40	40	40	40
hsa-miR-449a-4373207	40	35.4629	33.3277	40	40	37.6804	40	40	40	40	40	40	40	40	40	36.8003
hsa-miR-449b-4381011	40	30.7454	32.2064	40	40	40	31.5981	40	40	40	40	40	40	40	40	31.6798
hsa-miR-450a-4395414	40	40	40	40	40	40	40	40	40	40	40	40	40	40	40	32.2258
hsa-miR-450b-3p-4395319	40	40	40	40	40	40	40	40	40	40	40	40	40	40	40	40
hsa-miR-450b-5p-4395318	40	40	40	40	40	40	40	40	40	40	40	40	40	40	40	40
hsa-miR-451-4373360	22.7213	17.6091	18.7932	22.5065	23.1851	17.4072	18.5041	23.1631	23.093	17.7651	18.0109	20.6407	19.4631	20.3921	20.755	19.1045
hsa-miR-452-4395440	40	40	40	40	40	32.0905	40	40	40	34.0651	32.6892	40	40	33.0266	40	40
hsa-miR-453-4395429	40	40	40	40	40	40	40	40	40	40	40	40	40	40	40	40
hsa-miR-454-4395434	40	27.4557	28.5931	31.8166	35.2061	27.5199	27.8363	40	34.1731	27.7676	28.0346	32.3441	29.0807	29.9313	30.325	29.5277
hsa-miR-455-3p-4395355	40	40	40	40	40	40	40	40	40	40	40	40	40	40	40	40
hsa-miR-455-5p-4378098	40	40	40	40	40	40	40	40	40	40	40	40	40	40	40	40
hsa-miR-483-5p-4395449	31.8931	25.9369	26.743	29.5612	31.4233	27.042	26.6679	40	32.3865	26.9241	27.6548	27.878	28.688	28.9775	28.9275	27.6228
hsa-miR-484-4381032	25.438	20.9462	22.3545	24.8289	25.7508	19.8049	20.9816	25.5363	25.3795	20.1962	20.5999	23.1281	21.9647	22.6871	23.1898	22.7778
hsa-miR-485-3p-4378095	40	27.6691	32.7302	40	40	28.9692	40	40	40	28.2925	29.6443	30.3382	28.8254	31.2241	33.716	29.5706
hsa-miR-485-5p-4373212	40	40	40	40	40	40	40	40	40	40	40	40	40	40	40	40
hsa-miR-486-3p-4395204	29.716	24.9066	24.6044	29.0572	31.3208	24.7195	25.0127	32.3207	31.7343	25.0362	25.4199	26.455	26.164	27.0888	26.3782	26.9948
hsa-miR-486-5p-4378096	33.9733	25.0755	40	40	40	25.2375	26.3207	35.991	40	25.3886	40	40	26.7852	40	26.9763	28.7261
hsa-miR-487a-4378097	40	40	40	40	40	35.152	40	40	40	32.8047	34.9474	40	40	40	40	40
hsa-miR-487b-4378102	40	29.8522	34.0369	33.5104	40	30.1051	31.1635	40	40	29.6065	30.1483	31.7094	31.8863	40	40	34.0672
hsa-miR-488-4395468	40	40	40	40	40	40	40	40	40	40	40	40	40	40	40	40
hsa-miR-489-4395469	40	33.051	35.9304	35.7843	40	40	33.8002	40	40	33.6809	31.1229	40	34.1671	32.1915	40	31.0792
hsa-miR-490-3p-4373215	40	32.7697	40	40	40	40	40	40	40	40	40	40	40	40	40	40
hsa-miR-491-3p-4395471	40	40	40	40	40	40	40	40	40	40	40	40	40	40	40	40
hsa-miR-491-5p-4381053	40	30.8659	31.0983	35.5423	40	30.2885	40	40	40	30.5236	32.2713	31.7433	31.1279	40	40	40
hsa-miR-492-4373217	40	40	40	40	40	40	40	40	40	40	40	40	40	40	40	40
hsa-miR-493-4395475	40	33.4413	40	40	40	40	40	40	40	33.2182	40	40	40	40	40	40
hsa-miR-494-4395476	40	28.9234	33.994	40	40	29.0333	35.3746	40	35.2417	29.2319	29.2098	40	31.4452	40	40	40
hsa-miR-495-4381078	40	27.9576	40	31.9271	40	30.4877	31.1613	40	40	40	40	40	30.0022	40	40	33.218
hsa-miR-496-4386771	40	40	40	40	40	40	40	40	40	40	40	40	40	40	40	40
hsa-miR-499-3p-4395538	40	40	40	40	40	40	40	40	40	40	40	40	40	40	40	40
hsa-miR-499-5p-4381047	40	40	40	40	40	40	40	40	40	40	40	40	40	40	40	40
hsa-miR-500-4395539	40	34.5595	40	40	40	40	40	40	40	40	40	40	40	40	40	40
hsa-miR-501-3p-4395546	40	40	40	40	40	40	33.9587	40	40	40	40	40	40	40	40	40
hsa-miR-501-5p-4373226	40	40	40	40	40	40	40	40	40	40	40	40	40	40	40	34.9138
hsa-miR-502-3p-4395194	40	40	34.4282	40	40	33.4127	33.4185	40	40	40	40	33.0236	40	33.9426	40	40
hsa-miR-502-5p-4373227	40	28.7897	40	40	40	32.3025	40	40	40	40	40	40	31.6434	40	33.2186	40
hsa-miR-503-4373228	40	29.8117	31.4043	40	40	40	30.3178	40	40	34.9046	40	31.8181	40	31.2738	34.352	32.658
hsa-miR-504-4395195	40	40	40	40	40	40	40	40	40	40	40	40	40	40	40	40
hsa-miR-505-4395200	40	40	40	40	40	40	40	40	40	40	40	40	40	40	40	40
hsa-miR-506-4373231	40	40	40	40	40	40	40	40	40	40	40	40	40	40	40	40
hsa-miR-507-4373232	40	40	40	40	40	40	40	40	40	40	40	40	40	40	40	40
hsa-miR-508-3p-4373233	40	40	40	40	40	40	40	40	40	40	40	40	40	40	40	40
hsa-miR-508-5p-4395203	40	40	40	40	40	40	40	40	40	40	40	40	40	40	40	40
hsa-miR-509-3-5p-4395266	40	40	40	40	40	40	40	40	40	40	40	40	40	40	40	40
hsa-miR-509-5p-4395346	40	31.1328	32.0554	40	40	33.7206	30.6537	40	40	32.7523	31.3528	40	40	31.7559	34.2138	31.5628
hsa-miR-510-4395352	40	30.7749	31.4074	40	40	34.7374	33.0527	40	40	40	40	40	40	40	35.3065	40
hsa-miR-511-4373236	40	40	40	40	40	40	40	40	40	40	40	40	40	40	30.855	40
hsa-miR-512-3p-4381034	40	40	40	40	40	29.9177	40	40	40	40	40	40	40	40	40	40
hsa-miR-512-5p-4373238	40	33.7783	34.5977	40	40	31.5241	40	40	40	31.8943	32.635	40	34.1549	40	32.4395	40
hsa-miR-513-5p-4395201	40	40	40	40	40	40	40	40	40	40	40	40	40	40	40	40
hsa-miR-515-3p-4395480	40	40	40	40	40	40	40	40	40	36.5613	40	40	40	40	40	40
hsa-miR-515-5p-4373242	40	40	40	40	40	40	40	40	40	40	40	40	40	40	40	40
hsa-miR-516a-5p-4395527	40	40	40	40	40	40	40	40	40	40	40	40	40	40	40	40
hsa-miR-516b-4395172	40	28.6605	31.6334	40	40	29.2435	30.2406	40	40	29.5574	32.81	40	29.8903	40	40	30.5579
hsa-miR-517a-4395513	40	40	40	40	40	32.6846	32.9959	40	40	40	40	40	34.2556	40	40	40
hsa-miR-517b-4373244	40	33.6041	40	40	40	40	40	40	40	40	40	40	40	40	33.1072	40
hsa-miR-517c-4373264	35.3444	40	40	40	40	32.51	36.461	40	40	33.5284	33.3828	40	33.2408	40	40	40
hsa-miR-518a-3p-4395508	40	40	40	40	40	40	40	40	40	40	40	40	40	40	40	40
hsa-miR-518a-5p-4395507	36.4339	40	36.2463	40	40	40	40	40	40	40	40	40	40	40	40	40
hsa-miR-518b-4373246	40	40	40	40	40	40	40	40	40	40	40	40	35.6458	40	40	31.8475
hsa-miR-518c-4395512	40	40	40	40	40	40	40	40	40	40	40	40	40	40	40	40
hsa-miR-518d-3p-4373248	33.8262	40	31.3927	31.8882	34.4333	30.5088	32.148	33.0216	33.5749	30.3645	31.1711	30.6377	30.5398	32.7489	33.6643	31.3897
hsa-miR-518d-5p-4395500	40	40	40	40	40	40	40	40	40	40	40	40	40	40	40	40
hsa-miR-518e-4395506	40	40	40	40	40	36.4318	40	40	40	34.1069	40	34.4399	40	40	40	33.9942
hsa-miR-518f-4395499	40	40	40	40	40	40	40	40	40	40	40	40	40	40	40	40
hsa-miR-519a-4395526	40	40	35.0119	40	40	40	40	40	40	40	40	40	40	40	40	40
hsa-miR-519c-3p-4373251	40	40	40	40	40	40	40	40	40	40	40	40	40	40	40	40
hsa-miR-519d-4395514	40	40	40	40	40	30.9214	40	40	40	31.0822	32.209	40	33.0931	40	40	40
hsa-miR-519e-4395481	40	40	40	34.6685	40	34.0053	40	40	40	34.454	40	37.7598	40	33.6253	40	40
hsa-miR-520a-3p-4373268	40	40	40	40	40	33.0833	40	40	40	32.1256	40	40	40	40	40	40
hsa-miR-520a-5p-4378085	40	40	40	40	40	40	40	40	40	40	40	40	40	40	40	40
hsa-miR-520b-4373252	40	40	35.8959	40	36.4406	40	34.9141	40	40	33.5118	40	40	40	40	40	36.5881
hsa-miR-520d-5p-4395504	35.7942	40	32.7276	40	40	36.247	40	40	40	40	34.6599	40	40	40	40	33.7042
hsa-miR-520e-4373255	40	40	40	40	40	40	40	40	40	40	40	40	40	40	40	40
hsa-miR-520f-4373256	40	38.471	33.7755	40	36.8273	40	40	40	35.0452	40	40	40	40	40	40	40
hsa-miR-520g-4373257	40	40	40	34.1095	40	40	40	40	40	40	40	40	40	40	40	40
hsa-miR-521-4373259	40	40	40	40	40	40	40	40	40	40	40	40	40	40	40	40
hsa-miR-522-4395524	37.2404	40	40	40	40	40	40	40	40	40	40	32.9001	40	40	40	40
hsa-miR-523-4395497	34.2226	40	40	40	40	40	40	40	40	32.5012	32.6273	40	40	40	40	40
hsa-miR-524-5p-4395174	40	40	40	40	40	40	40	40	40	40	40	40	40	40	40	40
hsa-miR-525-3p-4395496	40	40	40	40	40	40	40	40	40	40	40	40	40	40	40	40
hsa-miR-525-5p-4378088	40	40	40	40	40	40	40	40	40	40	40	34.469	40	40	40	40
hsa-miR-526b-4395493	40	40	40	40	40	40	40	40	40	40	40	40	40	40	40	40
hsa-miR-532-3p-4395466	40	28.2298	29.3729	31.3009	33.7859	28.0411	29.7069	40	31.3051	28.4928	28.5363	30.8093	29.5999	29.983	30.1584	30.3913
hsa-miR-532-5p-4380928	40	28.9896	31.2828	40	40	27.7812	29.5724	40	40	28.7629	30.3363	31.9063	29.7854	30.9806	30.2237	32.5612
hsa-miR-539-4378103	40	29.7724	30.8068	40	40	28.9374	33.0153	40	32.8331	30.1564	28.2292	40	29.8953	40	40	29.7136
hsa-miR-541-4395312	40	40	40	40	40	40	40	40	40	40	40	40	40	40	40	40
hsa-miR-542-3p-4378101	40	40	40	40	40	40	40	40	40	40	40	40	40	40	40	40
hsa-miR-542-5p-4395351	40	40	40	40	40	40	40	40	40	40	40	40	40	40	40	40
hsa-miR-544-4395376	40	40	40	40	40	40	40	40	40	40	40	40	40	40	40	40
hsa-miR-545-4395378	40	40	40	40	40	40	40	40	40	33.7897	40	40	40	40	40	40
hsa-miR-548a-3p-4380948	33.1373	32.27	32.4631	32.2147	34.8429	30.3585	40	40	33.6992	30.6761	31.4499	34.0669	35.5027	32.2088	33.7748	32.9425
hsa-miR-548a-5p-4395523	40	40	40	40	40	40	40	40	40	40	40	40	40	40	40	40
hsa-miR-548b-3p-4380951	40	40	40	40	40	40	40	40	40	40	40	40	40	40	40	40
hsa-miR-548b-5p-4395519	40	40	40	40	40	40	40	40	40	40	40	40	40	40	40	40
hsa-miR-548c-3p-4380993	40	40	32.3336	32.9513	40	37.2678	31.896	40	40	40	40	40	40	40	40	32.5435
hsa-miR-548c-5p-4395540	40	35.4255	40	40	40	40	40	40	40	40	40	40	40	40	40	40
hsa-miR-548d-3p-4381008	40	40	40	40	40	40	40	40	40	40	40	40	40	40	40	40
hsa-miR-548d-5p-4395348	40	40	40	40	40	40	40	40	40	37.6531	32.0939	40	33.6918	40	40	40
hsa-miR-551b-4380945	40	40	40	40	40	40	40	40	40	29.0438	29.3132	40	33.3728	33.6087	40	40
hsa-miR-556-3p-4395456	40	40	40	40	40	40	40	40	40	40	40	40	40	40	40	40
hsa-miR-556-5p-4395455	40	40	40	40	40	40	40	40	40	40	40	40	40	40	40	40
hsa-miR-561-4380938	40	40	40	40	40	40	40	40	40	35.8365	40	40	40	40	40	40
hsa-miR-570-4395458	40	40	40	40	40	40	40	40	40	40	40	40	40	40	40	40
hsa-miR-574-3p-4395460	32.8332	24.9557	26.7563	40	31.4622	25.1562	26.4998	33.2328	40	25.5435	25.499	27.7416	26.9138	26.9996	27.6356	26.9734
hsa-miR-576-3p-4395462	40	40	30.5462	40	40	30.4176	40	40	40	30.4304	30.5347	30.6014	32.114	32.1896	40	31.64
hsa-miR-576-5p-4395461	40	33.1697	40	40	40	40	40	40	40	40	40	40	40	40	40	40
hsa-miR-579-4395509	40	40	40	40	40	30.6811	31.79	40	40	32.0902	33.5875	40	33.621	40	31.4916	34.548
hsa-miR-582-3p-4395510	40	35.2214	40	40	40	40	40	40	40	40	32.7605	40	40	40	40	32.0057
hsa-miR-582-5p-4395175	40	40	40	40	40	40	40	40	40	40	40	40	40	40	33.2288	40
hsa-miR-589-4395520	40	40	40	40	40	40	40	40	40	40	40	40	40	40	40	40
hsa-miR-590-5p-4395176	40	28.1561	30.6951	32.2536	34.5601	27.0306	27.9637	36.6808	40	27.9109	27.7992	30.7083	29.5312	30.3702	30.2287	28.2393
hsa-miR-597-4380960	30.3583	29.1638	29.9487	29.8835	32.5411	28.2169	28.3887	31.5387	40	29.1226	29.1392	32.4827	31.9612	29.9535	30.4471	30.5128
hsa-miR-598-4395179	40	31.365	35.5213	31.1722	35.3666	30.3628	30.9752	40	36.2423	30.005	33.2153	34.2112	31.0135	40	40	40
hsa-miR-615-3p-4386777	40	40	40	40	40	40	40	40	40	40	40	40	40	40	40	40
hsa-miR-615-5p-4395464	40	40	40	40	40	40	40	40	40	40	40	40	40	40	40	40
hsa-miR-616-4395525	40	40	40	40	40	40	40	40	40	40	40	40	40	40	40	40
hsa-miR-618-4380996	40	28.0754	40	32.1189	40	28.9217	26.2191	40	40	30.7488	30.2564	40	40	40	40	31.963
hsa-miR-624-4395541	40	40	40	40	40	40	40	40	40	40	40	40	40	40	40	40
hsa-miR-625-4395542	36.2842	31.0443	32.7764	40	37.5253	33.6852	34.5238	40	36.7672	34.6667	40	40	34.9945	33.2299	40	33.1939
hsa-miR-627-4380967	40	40	40	40	40	40	40	40	40	38.195	40	40	40	40	40	40
hsa-miR-628-5p-4395544	40	24.5324	40	40	40	31.3208	25.9632	36.2366	40	32.5674	33.0586	40	40	40	40	33.6107
hsa-miR-629-4395547	40	30.689	31.7614	40	40	31.8638	29.9664	40	40	34.7413	33.7307	34.0279	30.7349	30.9927	31.7971	33.2077
hsa-miR-636-4395199	40	40	30.8536	40	40	29.8113	30.1572	40	40	29.1622	30.3936	40	33.1237	32.7451	40	32.2071
hsa-miR-642-4380995	33.7156	40	40	40	33.9405	28.566	29.8706	40	40	29.3201	28.6523	30.9524	29.0139	40	40	40
hsa-miR-651-4381007	40	40	40	40	40	40	40	40	40	40	40	40	40	40	40	40
hsa-miR-652-4395463	40	30.529	40	40	40	31.2429	31.2868	40	40	30.213	30.5712	40	31.4937	33.1648	40	40
hsa-miR-653-4395403	40	40	40	40	40	40	40	40	40	40	40	40	40	40	40	40
hsa-miR-654-3p-4395350	40	30.3859	40	40	40	33.141	32.0441	34.5615	40	31.7849	34.043	40	40	40	40	33.0376
hsa-miR-654-5p-4381014	40	40	40	40	40	40	40	40	40	40	40	40	40	40	40	40
hsa-miR-655-4381015	40	29.9338	36.282	40	40	31.1085	34.3258	40	40	31.0763	32.6808	33.5866	33.2497	34.4222	40	35.2719
hsa-miR-660-4380925	30.7232	25.621	26.7373	33.3574	32.8506	24.8408	24.8311	32.1802	32.829	25.0003	25.463	27.1803	25.9971	27.1107	27.8138	27.0108
hsa-miR-671-3p-4395433	40	29.3456	32.9308	32.1916	40	40	33.1183	40	40	40	40	33.9328	40	31.975	33.8428	34.3314
hsa-miR-672-4395438	40	29.3039	40	40	40	40	40	40	40	40	40	40	40	40	32.7554	40
hsa-miR-674-4395193	40	40	40	40	40	40	40	40	40	40	40	40	40	40	40	40
hsa-miR-708-4395452	40	40	40	40	40	40	31.6187	40	40	40	40	40	40	40	40	40
hsa-miR-744-4395435	31.9789	27.6919	28.6646	40	32.9591	27.1213	27.8121	36.475	35.1079	27.6343	27.6541	29.0421	29.1308	28.6811	29.4872	30.106
hsa-miR-758-4395180	33.2963	30.5867	40	40	40	32.8817	40	40	40	32.3885	40	40	40	34.8992	31.3968	40
hsa-miR-871-4395465	40	40	40	40	40	40	40	40	40	40	40	40	40	40	40	40
hsa-miR-872-4395375	40	40	40	40	40	40	40	40	40	40	40	40	40	40	40	40
hsa-miR-873-4395467	40	40	40	40	40	40	40	40	40	40	40	40	40	40	40	40
hsa-miR-874-4395379	40	40	40	40	40	40	40	40	40	40	40	40	40	40	40	40
hsa-miR-875-3p-4395315	40	40	40	40	40	40	40	40	40	40	40	40	40	40	40	40
hsa-miR-876-3p-4395336	40	40	40	40	40	40	40	40	40	40	40	40	40	40	40	40
hsa-miR-876-5p-4395316	40	40	40	40	40	40	40	40	40	40	40	40	40	40	40	40
hsa-miR-885-3p-4395483	40	40	40	40	40	40	40	40	40	40	40	40	40	40	40	40
hsa-miR-885-5p-4395407	30.9246	28.7279	28.3939	30.0789	29.6763	26.8851	27.4038	40	30.6412	27.5334	27.6778	27.1158	28.5113	29.323	28.5877	27.1649
hsa-miR-886-3p-4395305	40	40	31.0556	34.4406	40	33.5538	31.7148	40	40	36.4116	35.7194	40	40	40	36.641	40
hsa-miR-886-5p-4395304	40	31.1766	40	40	40	34.4289	35.1907	40	40	35.7704	33.0084	32.9745	33.4878	34.3073	32.8149	33.046
hsa-miR-887-4395485	40	40	40	40	40	40	40	40	40	40	40	40	40	40	40	40
hsa-miR-888-4395323	40	40	40	40	40	40	40	40	40	40	40	40	40	40	40	40
hsa-miR-889-4395313	40	37.3222	40	40	40	40	40	40	40	40	40	40	33.7248	40	34.0411	32.181
hsa-miR-890-4395320	40	40	40	40	40	40	40	40	40	40	40	40	40	40	40	40
hsa-miR-891a-4395302	40	27.7298	28.5815	40	34.4642	28.2191	27.5675	40	40	28.2291	28.4663	29.1277	29.9451	29.9643	28.234	27.7639
hsa-miR-891b-4395321	40	40	40	40	40	40	40	40	40	40	40	40	40	40	40	40
hsa-miR-892a-4395306	40	40	40	40	40	40	40	40	40	40	40	40	40	40	40	40
hsa-miR-9-4373285	40	40	29.4198	40	40	40	40	40	40	30.1066	34.6123	40	40	40	40	40
hsa-miR-92a-4395169	24.5204	19.7954	20.8149	23.9858	24.9856	17.9984	19.2495	25.786	25.8771	18.317	18.5463	20.8705	19.9828	20.118	20.0558	19.8837
hsa-miR-93-4373302	32.8477	24.8888	25.8363	31.7943	31.6265	23.8223	25.1941	40	40	24.143	24.9699	27.5906	25.4447	26.1654	26.7721	26.3398
hsa-miR-95-4373011	40	28.6244	40	34.9737	40	29.8332	33.9851	40	40	40	40	40	33.4577	33.1034	34.5688	31.5383
hsa-miR-96-4373372	40	40	40	40	40	40	34.6451	40	35.4239	40	40	40	40	40	40	40
hsa-miR-98-4373009	40	40	40	40	40	40	33.322	40	40	40	40	40	40	40	40	40
hsa-miR-99a-4373008	40	28.0975	40	40	40	25.8187	32.6517	40	40	26.7398	27.6085	29.1641	28.5067	29.6239	33.7159	28.6787
hsa-miR-99b-4373007	34.2036	26.1075	27.579	29.5745	31.9863	25.1481	27.0388	32.1156	36.4084	25.2796	25.4337	27.2275	27.3995	28.7574	29.0693	26.7526
U6 snRNA-001973	40	32.4068	35.6422	34.4577	35.3641	40	40	40	33.8784	34.057	32.6896	40	34.0751	34.003	40	34.7901
U6 snRNA-001973	40	33.0419	34.5979	40	40	35.9629	40	40	35.174	40	33.3094	40	34.7559	40	28.23	33.4314
U6 snRNA-001973	36.9369	33.4388	34.8103	34.2801	36.8242	40	40	35.8544	33.752	33.9776	34.5232	35.3107	33.6238	40	30.6169	34.1846
U6 snRNA-001973	37.7601	34.216	34.4029	34.9118	36.3018	40	40	37.1102	33.9896	40	31.9372	40	34.1267	32.2586	40	33.5141
RNU44-001094	40	40	40	40	40	40	40	40	40	40	40	40	40	40	40	40
RNU48-001006	40	40	40	40	40	34.1	34.2237	40	40	40	40	40	40	40	40	40
ath-miR159a-000338	23.142	20.6066	20.7454	23.7342	23.8448	19.9104	20.6028	23.1974	23.8801	19.4771	21.1046	22.8637	23.1109	22.9567	21.3625	23.1468
hsa-let-7a#-002307	40	40	40	40	40	40	40	40	40	40	40	40	40	40	40	40
hsa-let-7b#-002404	40	40	40	40	40	40	40	40	40	40	40	40	40	40	40	40
hsa-let-7c#-002405	40	40	40	40	40	40	40	40	40	40	40	40	40	40	40	40
mmu-let-7d#-001178	40	40	40	40	40	40	40	40	40	40	40	40	40	40	40	40
hsa-let-7e#-002407	40	40	34.1631	40	40	40	40	40	40	40	34.4412	34.3722	40	33.9211	40	40
hsa-let-7f-1#-002417	40	40	40	40	40	40	40	40	40	40	40	40	40	40	40	40
hsa-let-7f-2#-002418	40	40	40	40	40	40	40	40	40	40	40	40	40	40	40	40
hsa-let-7g#-002118	40	40	40	40	40	40	40	40	40	40	40	40	40	40	40	40
hsa-let-7i#-002172	40	40	40	40	40	40	40	40	40	40	40	40	40	40	40	40
hsa-miR-100#-002142	40	40	40	35.7958	40	40	40	40	35.8018	40	40	40	40	40	40	40
hsa-miR-101#-002143	40	40	40	40	40	40	40	40	40	40	40	40	40	40	40	40
hsa-miR-105#-002168	40	40	40	40	40	40	40	40	40	40	40	40	40	40	40	40
hsa-miR-106a#-002170	40	40	40	40	40	40	40	40	40	40	40	40	40	40	40	40
hsa-miR-106b#-002380	40	40	40	40	40	40	40	40	40	40	40	40	40	40	40	40
hsa-miR-10a#-002288	40	40	40	40	40	40	40	40	40	40	40	40	40	40	40	40
hsa-miR-10b#-002315	33.0044	32.291	33.2532	32.8668	40	31.2832	31.0009	33.415	40	34.0725	34.366	33.0165	32.1503	32.4395	30.6438	32.4386
hsa-miR-1178-002777	40	40	40	40	40	40	40	40	40	33.873	40	40	40	40	33.9978	40
hsa-miR-1179-002776	40	40	40	40	40	40	40	40	40	40	40	40	40	40	40	40
hsa-miR-1180-002847	34.6292	40	35.9116	40	40	40	40	40	40	35.773	40	40	40	40	34.3794	40
hsa-miR-1182-002830	40	40	40	40	40	40	40	40	40	40	40	40	40	40	40	40
hsa-miR-1183-002841	40	27.7513	27.8055	40	33.108	40	40	40	40	30.376	40	31.3904	31.7863	40	40	29.9325
hsa-miR-1184-002842	40	40	40	40	40	40	40	40	40	40	40	40	40	40	40	40
hsa-miR-1197-002810	40	33.2791	35.8534	40	34.6688	33.5474	40	40	40	40	34.0148	33.5485	34.3926	32.2058	32.5153	32.1715
hsa-miR-1200-002829	40	40	40	40	40	40	40	40	40	40	40	40	40	40	40	40
hsa-miR-1201-002781	40	40	40	40	40	40	40	40	40	40	40	40	40	32.1758	40	40
hsa-miR-1203-002877	40	40	40	40	40	40	40	40	40	40	40	40	40	40	40	40
hsa-miR-1204-002872	40	40	40	40	40	40	40	40	40	40	40	40	40	40	40	40
hsa-miR-1205-002778	40	30.5997	32.2576	40	40	31.7932	32.3506	40	40	32.4341	32.1324	31.6628	32.6791	32.0259	32.2434	30.9697
hsa-miR-1206-002878	40	40	40	40	40	40	40	40	34.9072	40	40	34.7006	40	40	40	40
hsa-miR-1208-002880	31.5983	30.3284	31.7526	31.059	31.3909	35.3305	31.347	31.7736	33.1242	30.5515	32.2292	31.487	32.4566	31.5549	30.6679	31.0371
hsa-miR-122#-002130	40	40	40	40	40	33.5622	40	40	40	40	40	40	40	40	40	34.8015
hsa-miR-1224-3P-002752	40	33.5061	40	40	40	40	40	40	40	40	34.2713	40	40	40	40	37.2824
hsa-miR-1225-3P-002766	40	40	40	40	40	40	40	40	40	40	40	40	40	40	40	40
hsa-miR-1226#-002758	35.1372	28.1188	28.7169	40	33.4686	28.0247	27.6796	33.6478	34.1083	27.4195	28.207	28.7214	28.5335	28.3773	28.6004	28.4567
hsa-miR-1227-002769	35.3711	40	31.9778	34.3228	36.743	34.7644	34.1601	40	40	32.5636	31.5186	31.3629	33.2663	31.1721	32.0239	34.6164
hsa-miR-1228#-002763	40	40	40	40	40	40	32.4329	40	40	40	40	31.7496	31.7288	31.7127	35.1669	30.7456
hsa-miR-1233-002768	40	40	40	40	40	40	40	40	40	40	40	40	40	40	40	40
hsa-miR-1236-002761	40	40	40	40	40	40	40	40	40	40	40	40	40	40	40	40
hsa-miR-1238-002927	40	40	40	40	40	40	40	40	40	40	40	40	40	40	40	40
hsa-miR-124#-002197	40	40	40	40	40	40	40	40	34.4381	40	40	40	40	40	40	40
hsa-miR-1243-002854	33.9665	31.3436	40	34.0161	40	40	32.8297	40	36.3166	40	40	40	40	33.7965	40	40
hsa-miR-1244-002791	40	40	40	40	40	40	40	40	40	40	40	37.5831	40	40	40	40
hsa-miR-1245-002823	40	40	40	40	40	40	40	40	40	40	40	40	40	40	40	40
hsa-miR-1247-002893	40	40	32.7224	40	40	40	40	40	40	40	33.4778	40	40	40	40	40
hsa-miR-1248-002870	40	40	40	40	40	40	40	40	40	40	40	40	40	40	40	40
hsa-miR-1249-002868	40	40	40	40	40	40	40	40	40	40	40	40	40	40	40	40
hsa-miR-1250-002887	40	40	40	40	40	40	40	40	40	40	40	40	34.3829	40	40	33.498
hsa-miR-1251-002820	40	40	40	40	40	40	40	40	40	40	40	40	40	40	40	40
hsa-miR-1252-002860	40	40	40	40	40	40	40	40	40	40	40	40	40	40	40	40
hsa-miR-1253-002894	40	40	40	40	40	40	40	40	40	40	40	40	40	40	40	40
hsa-miR-1254-002818	40	31.1256	30.4032	40	40	29.8143	29.9489	40	40	30.6904	30.5263	30.4565	31.1765	30.658	33.407	30.5183
hsa-miR-1255A-002805	40	40	40	40	40	40	40	40	40	40	40	40	40	40	40	40
hsa-miR-1255B-002801	40	34.1167	33.0923	40	40	40	40	40	40	40	40	40	40	40	40	40
hsa-miR-1256-002850	40	40	40	40	40	40	40	40	40	40	40	40	40	40	40	40
hsa-miR-1257-002910	40	40	40	40	40	40	40	40	40	40	40	40	40	40	40	40
hsa-miR-1259-002796	40	40	40	40	40	40	40	40	40	40	40	40	40	40	40	40
hsa-miR-125b-1#-002378	40	40	40	40	40	40	40	40	40	40	40	40	40	40	40	34.7876
hsa-miR-125b-2#-002158	40	40	40	40	40	40	40	40	40	40	40	40	40	40	40	40
hsa-miR-126#-000451	30.9775	24.8993	26.3617	29.6971	40	27.1193	27.2185	30.9751	31.886	26.8518	27.8227	27.008	27.1439	40	27.316	27.8276
hsa-miR-1260-002896	27.6279	28.113	28.5491	26.295	27.5294	26.873	27.8738	27.8746	27.4099	27.8403	28.9509	28.2721	28.4115	27.6381	27.3355	27.8916
hsa-miR-1262-002852	40	36.0985	40	40	40	40	40	40	40	40	40	40	35.0336	40	40	40
hsa-miR-1263-002784	40	40	40	40	40	40	40	40	40	40	40	40	40	40	40	40
hsa-miR-1264-002799	40	40	40	40	40	40	40	40	40	40	40	40	40	40	40	40
hsa-miR-1265-002790	40	40	40	40	40	40	40	40	40	40	40	40	40	40	40	40
hsa-miR-1267-002885	40	40	40	40	40	40	40	40	40	40	40	40	40	40	40	40
hsa-miR-1269-002789	40	40	40	40	40	40	40	40	40	40	40	36.0832	32.0914	40	40	40
hsa-miR-1270-002807	40	40	34.3814	33.8376	40	40	40	34.4543	35.1697	32.8133	40	32.5918	40	30.9115	40	40
hsa-miR-1271-002779	40	34.8217	35.8681	40	40	40	40	40	40	33.2646	40	40	40	40	40	40
hsa-miR-1272-002845	40	40	40	40	40	40	40	40	40	40	40	40	40	40	40	40
hsa-miR-1274A-002883	31.2153	30.0099	29.1923	30.2851	30.4692	29.8503	29.9488	30.9222	40	29.5902	29.3764	31.9788	30.7517	30.2986	30.107	31.8051
hsa-miR-1274B-002884	29.8744	27.0536	26.6623	30.9826	30.5236	26.715	26.9154	29.9759	30.0204	27.0285	27.3279	28.1274	28.5	27.795	27.4734	27.9338
hsa-miR-1275-002840	29.4931	24.413	23.9994	30.098	29.482	24.5949	24.3055	28.9506	28.5946	24.1891	25.0234	24.0759	24.3203	24.243	24.9482	23.539
hsa-miR-1276-002843	34.236	31.9564	34.5424	34.3814	34.9415	32.046	31.5853	34.4955	40	33.0061	31.4024	30.533	31.1286	32.8419	31.3219	30.3475
hsa-miR-1278-002851	40	40	40	40	40	40	40	40	40	40	40	40	40	40	40	40
hsa-miR-1282-002803	40	40	40	40	40	40	40	40	40	40	40	40	33.262	40	40	40
hsa-miR-1283-002890	40	40	40	40	40	40	40	40	40	40	40	40	40	40	40	40
hsa-miR-1284-002903	40	40	40	40	40	40	40	40	40	40	40	40	40	40	40	40
hsa-miR-1285-002822	40	34.7981	40	40	40	33.6109	34.1651	40	34.5637	40	40	35.7859	40	34.7546	40	35.0537
hsa-miR-1286-002773	40	40	40	40	40	40	40	40	40	40	40	40	40	40	40	40
hsa-miR-1288-002832	40	40	40	40	40	40	40	40	40	40	40	40	40	40	40	40
hsa-miR-1289-002871	40	40	40	40	40	40	40	40	40	40	40	40	40	40	40	40
hsa-miR-129#-002298	40	40	40	40	40	40	40	40	40	40	40	40	40	40	40	40
hsa-miR-1290-002863	40	30.4491	31.9854	31.1337	33.2179	30.5419	29.7284	33.3968	33.2128	40	31.9578	30.5811	32.1076	33.0507	40	35.8881
hsa-miR-1291-002838	40	33.5953	32.3895	35.3287	40	32.0761	31.3869	40	34.9131	33.2268	34.127	32.7784	33.4765	32.2386	32.0665	32.6772
hsa-miR-1292-002824	40	40	40	40	40	40	40	40	40	40	40	40	40	40	40	40
hsa-miR-1293-002905	40	40	40	40	40	40	40	40	40	40	40	40	40	40	40	40
hsa-miR-1294-002785	40	40	40	40	40	40	40	40	40	40	40	40	40	40	40	40
hsa-miR-1296-002908	40	40	40	40	40	40	40	40	40	40	40	40	40	40	40	40
hsa-miR-1298-002861	32.4418	40	40	29.5967	40	40	40	34.7718	30.5936	40	40	40	40	40	35.5293	40
hsa-miR-1300-002902	37.1493	35.1632	33.0996	40	40	40	33.0245	40	40	34.1912	33.6489	40	37.6885	32.9034	31.261	33.7153
hsa-miR-1301-002827	40	40	40	40	40	40	40	40	40	40	40	40	40	40	40	40
hsa-miR-1302-002901	40	40	40	40	40	40	40	40	40	40	40	40	40	34.426	40	40
hsa-miR-1303-002792	40	40	34.3361	40	40	40	40	40	40	40	40	33.5524	32.9397	31.6255	40	32.7923
hsa-miR-1304-002874	40	40	40	40	40	40	40	40	40	40	40	40	40	40	40	40
has-miR-1305-002867	30.8848	30.9882	33.0073	30.264	31.6325	31.7504	30.9108	31.1427	30.7896	40	40	31.6741	32.4508	31.9701	35.7167	32.2447
hsa-miR-130a#-002131	40	40	40	40	40	40	40	40	40	40	40	40	40	40	40	40
hsa-miR-130b#-002114	40	40	40	40	40	40	40	40	40	40	40	40	40	40	40	40
hsa-miR-132#-002132	40	40	40	40	40	40	40	40	40	40	40	40	40	40	40	35.0261
hsa-miR-1324-002815	40	40	40	40	40	40	40	40	40	34.8102	40	40	40	40	40	34.6418
hsa-miR-135b#-002159	40	40	40	40	40	40	40	40	40	40	40	40	40	40	40	40
hsa-miR-136#-002100	40	33.7482	40	40	40	40	40	40	40	40	40	40	34.6746	40	32.3824	40
hsa-miR-138-2#-002144	40	40	40	40	40	40	40	40	40	40	40	40	40	40	40	40
hsa-miR-141#-002145	33.2977	37.4465	35.5126	32.8869	40	40	40	34.0656	33.7929	40	40	40	36.1878	40	40	35.9128
hsa-miR-143#-002146	40	40	40	40	40	40	40	40	40	40	40	40	40	40	40	40
hsa-miR-144-002676	40	40	40	40	40	40	40	40	40	40	40	40	35.1536	40	40	40
hsa-miR-144#-002148	31.4836	28.7487	32.5354	34.1748	33.9595	28.7859	28.2154	33.9909	35.5403	30.3376	30.9188	30.1446	30.5773	29.1028	29.16	30.5215
hsa-miR-145#-002149	40	32.2691	32.3785	40	40	40	40	40	40	31.8964	31.9681	32.1897	38.1236	31.5655	33.9428	30.0848
hsa-miR-146a#-002163	40	40	40	40	40	40	40	40	40	40	40	40	40	40	40	40
hsa-miR-148a#-002134	40	40	40	40	40	40	40	40	40	40	40	35.1861	40	40	40	40
hsa-miR-148b#-002160	40	33.1007	40	40	40	40	33.7149	40	40	40	40	40	40	40	40	33.5996
hsa-miR-149#-002164	40	40	40	40	40	40	40	40	40	40	40	40	40	40	40	40
hsa-miR-151-3p-002254	29.3474	25.6769	28.4121	29.6893	31.1153	26.8949	26.9803	29.7891	29.7448	28.5081	28.2232	28.8335	27.3837	27.3531	27.53	28.2186
hsa-miR-151-5P-002642	32.3363	29.5704	32.9173	40	40	30.8827	32.5768	40	40	32.4313	40	31.7609	32.7394	31.7768	32.1688	40
hsa-miR-154#-000478	40	31.0625	40	40	40	40	40	40	40	40	40	40	32.2475	40	40	40
hsa-miR-155#-002287	40	40	40	40	40	40	40	40	40	40	40	40	40	40	40	40
hsa-miR-15a#-002419	40	40	40	40	40	40	40	40	40	40	40	40	40	40	40	40
hsa-miR-15b#-002173	40	40	40	40	40	40	40	40	40	40	40	40	40	40	40	40
hsa-miR-16-1#-002420	40	40	40	40	40	40	40	40	40	40	40	40	40	40	40	40
hsa-miR-16-2#-002171	40	40	40	40	40	40	40	40	40	40	40	40	40	40	40	40
hsa-miR-17#-002421	40	40	40	40	40	40	40	40	40	40	40	40	40	40	40	40
hsa-miR-181a-2#-002317	40	31.1971	32.4986	40	40	31.1133	30.1748	40	40	32.1168	40	32.5611	33.2348	34.1661	40	40
hsa-miR-181c#-002333	40	40	40	40	40	40	40	40	40	40	40	40	40	40	40	40
hsa-miR-182#-000483	40	40	40	40	40	40	40	40	40	40	40	40	33.8222	40	40	40
hsa-miR-1825-002907	29.8242	29.459	29.3873	29.6665	30.4812	28.8682	29.4729	30.9844	30.478	28.895	28.8265	26.4226	29.2442	28.136	25.298	28.7932
hsa-miR-1826-002873	40	40	40	40	40	40	40	40	40	40	40	40	40	40	40	40
hsa-miR-183#-002270	32.8276	40	40	40	40	32.3906	31.6198	40	40	34.5681	40	40	40	40	40	40
hsa-miR-185#-002104	40	40	40	40	40	40	40	40	40	40	40	40	33.1649	40	40	40
hsa-miR-186#-002105	40	40	40	40	40	40	40	40	40	40	40	40	40	40	40	40
hsa-miR-18a#-002423	40	40	40	40	40	40	40	40	40	40	40	40	40	40	40	33.5166
hsa-miR-18b#-002310	40	40	40	40	40	40	40	40	40	40	40	40	40	40	40	40
hsa-miR-190b-002263	40	33.324	40	36.1204	33.6989	40	31.3178	31.5643	33.3042	33.8005	35.2593	40	37.331	35.4692	40	33.4792
hsa-miR-191#-002678	40	40	40	40	40	32.1983	33.5949	40	40	37.2613	40	40	33.971	40	40	40
hsa-miR-192#-002272	40	40	40	40	40	40	40	40	40	40	40	40	40	40	40	40
hsa-miR-193b#-002366	40	40	40	40	40	40	40	40	40	40	40	40	40	40	40	40
hsa-miR-194#-002379	40	40	40	40	40	40	40	40	40	40	40	40	40	40	40	40
hsa-miR-195#-002107	40	40	40	40	40	40	40	40	40	40	40	40	40	40	40	40
hsa-miR-196a#-002336	40	40	40	40	40	40	40	40	40	40	40	40	40	40	40	40
hsa-miR-19a#-002424	40	40	40	40	40	40	40	40	40	40	40	40	40	40	40	40
hsa-miR-19b-1#-002425	32.4013	35.8698	34.2646	32.6797	32.8784	40	32.4132	32.6547	32.6785	32.8506	36.5987	33.2911	34.407	33.0254	31.7791	33.5238
hsa-miR-200a#-001011	40	33.6848	40	40	40	40	40	40	40	40	40	40	40	40	40	40
hsa-miR-200b#-002274	40	40	40	40	40	40	40	40	40	40	40	40	40	40	40	40
hsa-miR-200c#-002286	40	40	40	40	40	40	40	40	40	40	40	40	40	40	40	40
hsa-miR-202#-002362	40	40	40	40	40	40	40	40	40	40	40	40	40	40	40	40
hsa-miR-206-000510	32.4182	29.8033	33.4521	40	40	40	32.6336	35.8061	35.0071	40	40	40	40	40	40	40
hsa-miR-20a#-002437	40	40	40	40	40	40	40	40	40	40	40	40	40	40	40	40
hsa-miR-20b#-002311	40	40	40	40	40	40	40	40	40	40	40	35.9744	40	40	40	40
hsa-miR-21#-002438	40	30.8165	32.9791	40	40	31.2313	40	40	40	31.6336	40	33.7405	40	40	29.6236	32.0083
hsa-miR-213-000516	40	40	40	40	40	40	40	40	40	40	40	40	32.7478	40	40	40
hsa-miR-214#-002293	40	40	40	40	40	40	40	40	40	40	40	40	40	40	40	40
hsa-miR-218-1#-002094	40	40	40	40	40	40	40	40	40	40	40	40	40	40	40	40
hsa-miR-218-2#-002294	40	40	40	40	40	40	40	40	40	40	40	40	40	40	40	40
hsa-miR-22#-002301	40	31.4696	40	40	40	31.6594	34.813	40	40	40	33.7416	38.2538	40	32.2142	31.3752	40
hsa-miR-221#-002096	40	40	40	40	40	40	40	40	40	40	40	40	40	40	40	40
hsa-miR-222#-002097	40	40	40	40	40	40	40	40	40	40	40	40	40	40	40	40
hsa-miR-223#-002098	40	30.1943	30.0839	31.8217	40	28.6888	29.3908	40	36.4833	32.5713	30.0168	32.2305	30.39	30.617	29.6634	29.0237
hsa-miR-23a#-002439	34.187	30.1759	29.7581	33.1996	34.3081	29.433	29.4553	34.982	36.6615	29.1156	30.4403	29.3117	29.5747	29.4411	29.2928	29.1523
hsa-miR-23b#-002126	40	40	40	40	40	40	40	40	40	40	40	40	40	40	40	40
hsa-miR-24-1#-002440	40	40	40	40	40	40	40	40	40	40	40	40	40	40	40	40
hsa-miR-24-2#-002441	40	40	40	40	40	40	40	40	40	40	36.4573	40	40	40	40	40
hsa-miR-25#-002442	40	40	40	40	40	31.9534	40	40	40	40	40	40	33.7917	40	40	33.6807
hsa-miR-26a-1#-002443	40	32.7274	35.5205	40	40	40	40	40	40	40	33.418	34.1945	33.99	40	34.7821	40
hsa-miR-26a-2#-002115	40	40	40	40	40	40	40	40	40	40	40	40	40	40	40	40
hsa-miR-26b#-002444	40	34.3157	36.5078	34.7177	40	40	33.3212	40	40	32.0406	34.7291	32.8987	32.4413	32.7136	32.4785	34.8965
hsa-miR-27a#-002445	37.0656	34.3701	40	40	35.3732	40	40	40	40	40	40	35.4033	37.9129	40	40	36.1011
hsa-miR-27b#-002174	40	40	40	40	40	40	40	40	40	40	40	35.9919	35.273	35.4357	40	40
hsa-miR-29a#-002447	40	40	40	40	40	40	40	40	40	40	40	40	40	40	40	40
hsa-miR-29b-1#-002165	40	40	40	40	40	40	40	40	40	40	40	40	40	40	40	40
hsa-miR-29b-2#-002166	40	40	40	40	40	34.5091	40	40	40	40	40	40	40	40	40	40
rno-miR-29c#-001818	40	40	40	40	40	32.9787	34.0809	40	40	33.1758	33.5667	40	33.639	40	33.2908	40
hsa-miR-302a#-002381	40	40	35.4666	40	40	40	40	40	40	40	32.5316	35.4298	40	40	40	40
hsa-miR-302b#-002119	40	40	40	40	40	40	40	40	40	40	40	40	40	40	40	40
hsa-miR-302c#-000534	40	40	40	40	40	40	40	40	40	40	40	40	35.0029	40	40	32.4657
hsa-miR-302d-000535	40	31.9419	37.0873	32.0904	40	40	40	40	40	40	34.7702	40	40	40	40	40
hsa-miR-302d#-002120	40	40	40	40	40	40	40	40	40	40	40	40	40	40	40	40
hsa-miR-30a-3p-000416	34.2176	29.6055	30.9623	33.5802	40	40	33.6004	40	40	29.8142	30.1296	31.5763	31.5691	40	31.8649	30.1864
hsa-miR-30a-5p-000417	26.8207	25.4174	26.4157	27.1029	27.0889	24.7922	24.1488	27.2399	26.9831	26.8157	26.837	26.5797	26.9782	26.6673	27.1018	26.5156
hsa-miR-30b#-002129	40	40	40	40	40	40	40	40	40	40	40	40	40	40	40	40
hsa-miR-30c-1#-002108	40	40	40	40	40	40	40	40	40	40	40	40	40	40	40	40
hsa-miR-30c-2#-002110	40	40	40	40	40	40	40	40	40	40	40	40	40	40	40	40
hsa-miR-30d-000420	30.4023	27.6394	30.9914	30.7113	32.4811	27.5671	27.9266	30.5799	32.0295	30.7552	32.0055	31.9517	30.0936	31.7902	30.4732	29.7531
hsa-miR-30d#-002305	40	40	40	40	40	40	40	40	40	40	40	40	40	40	40	40
hsa-miR-30e-3p-000422	30.815	27.2392	29.8482	31.3104	33.7023	27.7793	27.7407	31.5346	40	29.0925	30.9936	29.6821	29.5043	30.1613	30.792	29.194
hsa-miR-31#-002113	40	40	40	40	40	40	40	40	40	40	40	40	40	40	40	40
hsa-miR-32#-002111	40	40	40	40	40	40	40	40	40	40	40	40	40	40	40	40
hsa-miR-320B-002844	32.1642	27.8406	28.94	30.4509	40	27.5679	27.5234	31.7124	32.0268	29.6418	29.4512	30.9139	30.1334	29.9197	29.8101	29.9665
hsa-miR-335#-002185	40	32.9727	40	40	40	32.2787	40	40	40	33.1112	33.8437	40	40	40	32.5376	34.0106
hsa-miR-337-3p-002157	40	40	40	40	40	40	40	40	40	40	40	40	32.9772	40	40	40
hsa-miR-338-5P-002658	31.3726	36.6829	40	31.914	30.994	40	40	32.5544	33.3686	36.1712	40	29.1645	30.9779	28.9598	29.9652	30.6847
hsa-miR-33a-002135	35.381	40	40	40	40	40	40	40	37.2232	40	36.0494	40	33.9341	35.6506	35.5218	33.5913
hsa-miR-33a#-002136	40	40	40	40	40	40	40	40	40	40	40	40	40	32.6675	40	40
hsa-miR-340#-002259	33.9869	30.0902	30.5209	32.8335	40	30.8305	30.0372	32.6711	40	31.3182	31.6498	31.0063	34.2096	31.0821	30.6681	31.4201
hsa-miR-34a#-002316	33.8731	40	28.377	40	40	33.0237	32.368	40	40	30.3452	30.9078	30.4025	40	30.7891	34.932	32.592
hsa-miR-34b-000427	40	40	40	40	40	40	40	40	40	40	40	40	40	40	40	40
hsa-miR-34b-002102	31.6125	40	40	40	40	32.2731	32.2666	31.7042	40	40	40	33.421	33.0325	40	40	33.0312
hsa-miR-361-3p-002116	40	40	40	40	40	40	40	40	40	40	40	40	40	40	40	40
hsa-miR-363#-001283	40	40	40	40	40	40	40	40	40	40	40	40	40	40	40	40
hsa-miR-367#-002121	40	40	40	40	40	40	40	40	40	40	40	40	40	40	40	40
hsa-miR-374a#-002125	40	40	40	40	40	40	40	40	40	40	40	40	40	40	40	40
hsa-miR-374b#-002391	40	40	40	40	40	40	40	40	40	40	40	40	40	40	40	40
hsa-miR-376a#-002127	40	40	40	40	40	40	40	40	40	40	40	40	40	40	40	40
hsa-miR-377#-002128	40	35.8391	40	40	40	40	40	40	40	40	40	40	40	40	40	40
hsa-miR-378-000567	40	40	40	33.6016	40	33.4478	40	40	40	35.4858	36.2221	38.0526	40	40	34.9169	35.385
hsa-miR-378-002243	31.0235	30.034	30.3332	30.4755	29.707	30.7732	28.8085	30.2258	31.8423	30.3645	31.8278	31.7597	31.5694	31.9297	32.9104	31.4221
hsa-miR-380-5p-000570	40	40	40	40	40	40	40	40	40	40	40	40	40	40	40	40
hsa-miR-409-3p-002332	40	23.602	31.4235	30.8542	40	29.4018	28.9452	33.4623	33.7214	40	30.5242	31.3893	27.4018	30.6468	40	40
hsa-miR-411#-002238	40	37.6483	31.9335	40	40	30.6789	32.455	40	40	33.7853	40	32.0548	31.6341	31.4551	40	32.5518
hsa-miR-424#-002309	40	37.238	40	40	40	40	40	40	40	40	40	40	40	40	40	40
hsa-miR-425#-002302	40	29.7272	40	40	40	32.629	33.3551	40	40	40	40	33.2415	40	40	33.6409	40
hsa-miR-431#-002312	40	40	40	40	40	40	40	40	40	40	40	40	40	40	40	40
hsa-miR-432-001026	40	27.6635	30.1598	40	40	32.7116	40	35.3645	40	31.5188	29.7325	29.77	29.2292	40	31.1324	30.1516
hsa-miR-432#-001027	40	40	40	40	40	40	40	40	40	40	40	40	35.1012	40	40	40
hsa-miR-452#-002330	40	40	40	40	40	40	40	37.5995	40	40	40	40	40	40	40	36.0663
hsa-miR-454#-001996	40	40	40	40	40	40	40	40	40	40	35.2877	33.3644	40	34.9068	40	40
hsa-miR-483-3p-002339	30.7749	40	40	40	40	40	34.8531	40	40	40	40	40	40	40	40	32.4487
hsa-miR-488-001106	40	28.9324	28.1048	40	40	28.4242	28.2239	40	40	27.9654	27.4516	28.6141	27.9176	28.4194	26.208	27.764
hsa-miR-497-001043	40	40	40	40	40	40	40	40	40	40	40	34.7266	40	40	40	40
hsa-miR-497#-002368	40	40	40	40	40	40	40	40	40	40	40	40	40	40	40	40
hsa-miR-500-001046	40	40	40	40	40	40	40	40	40	40	40	40	40	40	40	40
hsa-miR-505#-002087	40	32.8562	40	40	40	36.2415	33.0799	40	34.9097	40	40	32.828	32.5478	34.6635	33.2829	33.1754
hsa-miR-513B-002757	40	40	40	40	40	40	40	40	40	40	40	40	40	40	40	40
hsa-miR-513C-002756	40	40	40	40	40	40	40	40	40	40	40	40	40	40	40	40
hsa-miR-516-3p-001149	31.3547	31.9539	40	30.2793	32.0116	31.6906	30.5343	31.3674	31.2747	32.9309	31.8349	40	32.072	40	40	31.8688
hsa-miR-517#-001113	40	40	40	40	40	40	40	40	40	40	40	40	40	40	40	40
hsa-miR-518c#-001158	40	33.7459	40	40	40	40	40	40	40	40	40	35.0958	35.294	40	40	40
hsa-miR-518e#-002371	40	33.9682	40	40	40	40	40	40	40	35.8119	40	40	40	40	40	33.7435
hsa-miR-518f#-002387	40	40	40	40	40	40	40	40	40	40	40	40	40	40	40	40
hsa-miR-519b-3p-002384	40	40	40	35.3589	40	32.4215	40	40	34.8293	40	40	40	36.7186	40	40	40
hsa-miR-519e#-001166	40	40	40	40	40	40	40	40	40	40	40	40	40	40	40	40
hsa-miR-520c-3p-002400	33.9299	32.0858	31.4075	33.0633	34.3196	31.6927	31.0239	40	35.9438	32.6183	36.3422	40	35.0646	40	32.336	40
hsa-miR-520D-3P-002743	33.043	40	40	32.2979	32.842	34.0055	40	32.8767	33.2961	40	40	32.0744	40	40	40	40
hsa-miR-520h-001170	40	40	40	33.1447	40	40	40	40	40	40	40	40	40	40	40	40
hsa-miR-524-001173	40	40	36.8617	40	40	40	40	40	40	34.9804	40	40	40	40	40	40
hsa-miR-541#-002200	40	40	40	40	40	40	40	40	40	40	40	40	40	40	40	40
hsa-miR-543-002376	40	31.4048	40	40	40	40	40	40	40	31.8044	40	40	33.0888	33.0246	40	40
hsa-miR-545#-002266	40	40	40	40	40	40	40	40	40	40	40	40	40	40	40	40
hsa-miR-548E-002881	40	40	40	40	40	40	40	40	40	40	40	40	40	40	40	40
hsa-miR-548G-002879	40	40	40	40	40	40	40	40	40	40	40	40	40	40	40	40
hsa-miR-548H-002816	40	40	40	40	40	40	40	40	40	40	40	40	40	40	40	40
hsa-miR-548I-002909	40	40	40	40	40	40	40	40	40	40	40	40	40	40	40	40
hsa-miR-548J-002783	40	40	40	40	40	40	40	40	40	40	40	40	40	40	40	40
hsa-miR-548K-002819	40	40	40	40	40	40	40	40	40	40	40	40	40	40	40	40
hsa-miR-548L-002904	40	40	40	40	40	40	40	40	40	40	40	40	40	40	40	40
hsa-miR-548M-002775	40	40	40	40	40	40	40	40	40	40	40	40	40	40	40	40
hsa-miR-548N-002888	40	40	40	40	40	40	40	40	40	40	40	40	40	40	40	40
hsa-miR-548P-002798	40	40	40	40	40	40	40	40	40	40	40	40	40	40	40	40
hsa-miR-549-001511	40	40	40	40	40	40	40	40	40	40	40	40	40	40	40	40
hsa-miR-550-001544	29.3769	26.3874	26.7452	29.2273	29.9257	25.4225	25.8129	29.7199	29.5605	23.0569	26.4758	27.3418	28.3008	28.2648	28.1324	29.0765
hsa-miR-550-002410	40	31.7556	29.7279	40	40	29.679	29.6095	40	40	30.3253	30.6899	29.931	31.0623	30.3174	30.0553	30.2276
hsa-miR-551a-001519	40	40	40	40	40	40	40	40	40	40	40	40	40	40	40	40
hsa-miR-551b#-002346	40	40	40	40	40	40	40	40	40	40	40	40	40	40	40	40
hsa-miR-552-001520	40	40	40	40	40	40	40	40	40	40	40	40	40	40	40	40
hsa-miR-553-001521	40	40	40	40	40	40	40	40	40	40	40	40	40	40	40	40
hsa-miR-554-001522	40	35.8489	34.8543	40	40	32.6871	36.8287	40	40	40	40	40	40	40	40	32.5307
hsa-miR-555-001523	40	40	40	40	40	40	40	40	40	40	40	40	40	40	40	40
hsa-miR-557-001525	40	40	40	40	40	40	40	40	40	40	40	40	40	40	40	40
hsa-miR-558-001526	40	40	40	40	40	40	40	40	40	40	40	40	40	40	40	40
hsa-miR-559-001527	40	40	40	40	40	40	40	40	40	40	40	40	40	40	40	40
hsa-miR-562-001529	40	40	40	40	40	40	40	40	40	40	40	40	40	40	40	40
hsa-miR-563-001530	40	40	40	40	40	40	40	40	40	40	40	40	40	33.7017	40	40
hsa-miR-564-001531	40	31.2151	31.249	40	40	29.857	31.2481	40	32.6496	29.2415	40	29.6636	40	40	30.9055	31.9341
hsa-miR-566-001533	40	30.0738	28.9757	40	40	40	32.4068	40	40	27.438	29.896	30.4743	30.3346	33.1946	32.8179	29.6354
hsa-miR-567-001534	40	40	40	40	40	40	40	40	40	40	40	40	40	40	40	40
hsa-miR-569-001536	40	40	40	40	40	40	40	40	40	40	40	40	40	40	40	40
hsa-miR-571-001613	31.4635	40	40	31.2303	31.1411	40	40	30.9181	32.0702	33.1266	33.401	24.967	32.9097	29.2029	40	30.8203
hsa-miR-572-001614	40	31.403	30.6735	32.03	40	31.3538	31.8211	36.4681	34.0126	32.1883	31.4599	34.1237	33.7871	31.5776	34.2166	34.9356
hsa-miR-573-001615	40	40	40	40	40	40	32.348	40	40	40	40	37.0437	40	40	40	33.1452
hsa-miR-575-001617	40	40	40	40	40	40	40	40	40	40	40	40	40	40	40	40
hsa-miR-577-002675	40	40	40	40	40	40	40	33.7911	40	40	40	40	40	40	40	40
hsa-miR-578-001619	40	40	40	40	40	40	40	40	40	40	40	35.9415	40	40	40	34.0166
hsa-miR-580-001621	40	40	40	40	40	40	40	40	40	40	40	40	40	36.4576	40	40
hsa-miR-581-001622	40	40	40	35.7223	40	40	40	40	40	40	40	40	37.6608	40	40	37.751
hsa-miR-583-001623	40	40	40	35.1972	40	40	40	40	40	40	40	40	40	40	40	40
hsa-miR-584-001624	40	33.3739	40	37.8698	40	40	40	40	40	30.8981	33.9643	31.7259	40	33.4297	40	35.0365
hsa-miR-585-001625	40	40	40	40	40	40	40	40	40	40	40	40	40	40	40	40
hsa-miR-586-001539	40	40	40	40	40	40	40	40	40	40	40	40	40	40	40	40
hsa-miR-587-001540	40	40	40	40	40	40	40	40	40	40	40	40	40	40	40	40
hsa-miR-588-001542	40	40	40	40	40	40	40	40	40	40	40	40	40	40	40	40
hsa-miR-589-001543	40	40	40	40	40	40	40	40	40	40	40	40	40	40	40	40
hsa-miR-590-3P-002677	40	40	40	40	40	40	40	40	40	40	40	40	33.711	40	40	40
hsa-miR-591-001545	40	40	40	40	40	40	40	40	40	40	40	40	40	40	40	33.3797
hsa-miR-592-001546	40	40	40	40	37.3223	40	40	40	40	40	40	40	40	40	40	40
hsa-miR-593-001547	40	40	40	40	40	40	40	40	40	40	40	40	40	40	40	40
hsa-miR-593-002411	40	40	40	40	40	40	40	40	40	40	40	40	40	40	40	40
hsa-miR-595-001987	40	40	40	40	40	40	40	40	40	40	40	40	40	40	40	40
hsa-miR-596-001550	40	40	40	40	40	40	40	40	40	40	40	40	40	40	40	40
hsa-miR-599-001554	40	40	40	40	40	40	40	40	40	40	40	40	40	40	40	40
hsa-miR-600-001556	40	40	40	40	40	40	40	40	40	40	40	40	40	40	40	40
hsa-miR-601-001558	32.7886	32.4752	30.858	32.469	31.6358	31.8319	29.29	31.8753	28.6483	31.3272	32.5362	32.3578	37.4368	32.455	33.1958	35.3408
hsa-miR-603-001566	31.7451	35.0887	32.7132	30.6727	31.3331	40	40	30.8266	32.1054	40	33.8056	33.1123	33.4385	40	40	40
hsa-miR-604-001567	40	40	40	40	40	40	40	40	40	40	40	40	40	40	40	36.4975
hsa-miR-605-001568	40	40	32.1282	40	40	32.8575	40	40	40	29.7687	31.0476	31.9261	30.8074	30.9209	30.6317	30.6315
hsa-miR-606-001569	40	40	40	40	40	40	40	40	40	40	40	40	40	40	40	40
hsa-miR-607-001570	40	40	40	40	40	40	40	40	40	40	40	40	40	40	40	40
hsa-miR-608-001571	40	40	40	40	40	40	40	40	40	40	40	40	40	40	40	40
hsa-miR-609-001573	40	40	40	40	40	40	40	40	40	40	40	40	40	40	40	40
hsa-miR-613-001586	40	40	40	40	40	40	40	40	40	40	40	40	40	40	40	40
hsa-miR-614-001587	40	35.8434	34.5766	40	40	40	40	40	40	34.6531	40	35.5243	40	40	40	40
hsa-miR-616-001589	40	36.3209	40	33.7716	40	40	40	40	40	40	40	40	34.987	40	40	40
hsa-miR-617-001591	40	40	40	40	40	40	40	40	40	40	40	40	40	40	40	40
hsa-miR-620-002672	40	40	40	40	40	40	40	40	40	40	40	40	40	40	40	40
hsa-miR-621-001598	40	40	40	40	40	40	40	40	40	40	40	40	40	40	40	40
hsa-miR-622-001553	40	40	40	40	40	40	40	40	40	40	40	40	40	40	40	34.6343
hsa-miR-623-001555	33.5004	32.8844	34.4	34.0749	33.0505	33.3806	40	34.2568	34.1602	33.2204	33.0879	34.9627	40	33.9619	35.9287	40
hsa-miR-624-001557	37.0224	40	36.0297	34.2824	35.7376	40	40	35.2968	33.5527	40	40	34.4704	40	40	34.502	40
hsa-miR-625#-002432	33.0111	27.5391	30.1526	40	31.7567	30.9946	30.256	33.9019	30.1399	30.5161	30.8485	29.232	31.6041	29.0399	31.7193	33.7694
hsa-miR-626-001559	40	40	40	40	40	40	40	40	40	40	40	40	40	40	40	40
hsa-miR-628-3p-002434	40	40	40	40	40	33.4169	40	34.5176	40	40	34.6474	33.0086	33.0513	40	40	40
hsa-miR-629-001562	40	40	40	40	40	33.6329	31.6005	40	40	40	40	40	40	40	40	40
hsa-miR-630-001563	40	40	40	40	40	40	40	40	40	40	40	40	40	40	30.8866	40
hsa-miR-631-001564	40	40	40	40	40	40	40	40	40	40	40	40	40	40	40	40
hsa-miR-633-001574	40	40	40	40	40	40	40	40	40	40	40	40	35.2936	40	40	40
hsa-miR-634-001576	40	40	40	40	40	40	40	40	40	40	40	40	40	40	40	40
hsa-miR-635-001578	40	40	40	40	40	40	40	40	40	40	40	40	40	40	40	40
hsa-miR-637-001581	40	40	40	40	40	40	40	40	40	40	40	40	40	40	40	40
hsa-miR-638-001582	29.1536	30.5422	30.6015	29.3717	29.508	31.422	31.083	29.1643	29.7165	40	32.0983	32.106	31.934	32.7888	40	32.2413
hsa-miR-639-001583	40	40	40	40	40	40	40	40	40	40	40	40	40	40	40	40
hsa-miR-640-001584	40	40	40	40	40	40	40	40	40	40	40	40	40	40	40	40
hsa-miR-641-001585	40	40	40	40	40	40	40	40	40	40	40	40	40	40	40	40
hsa-miR-643-001594	40	40	40	40	40	40	40	40	40	40	40	40	40	40	40	40
hsa-miR-644-001596	40	40	40	40	40	40	40	40	40	40	40	40	40	40	40	40
hsa-miR-645-001597	32.1539	30.9441	30.804	31.8013	31.7512	31.3464	31.016	30.8731	31.8716	30.9947	31.7014	33.2544	33.111	32.788	31.6074	34.4503
hsa-miR-646-001599	40	40	40	40	40	40	40	40	40	40	40	40	40	40	40	40
hsa-miR-647-001600	40	40	40	40	40	40	40	40	40	40	40	40	40	40	40	40
hsa-miR-648-001601	40	40	40	40	40	40	40	40	40	40	40	40	40	40	40	40
hsa-miR-649-001602	40	40	40	40	40	40	40	40	40	40	40	40	40	40	40	40
hsa-miR-650-001603	40	40	40	40	40	40	40	40	40	40	40	40	40	40	40	40
hsa-miR-656-001510	40	40	40	40	40	40	40	40	40	40	40	40	40	40	40	40
hsa-miR-657-001512	40	40	40	40	40	40	40	40	40	40	40	40	40	40	40	40
hsa-miR-658-001513	40	40	40	40	40	40	40	40	40	40	40	40	40	40	35.6691	40
hsa-miR-659-001514	40	40	40	40	40	40	40	40	35.072	40	40	40	40	40	40	40
hsa-miR-661-001606	40	29.1924	27.804	40	40	26.2182	26.6715	40	40	27.5433	27.5289	27.0785	32.2848	28.3332	31.0039	29.562
hsa-miR-662-001607	40	40	40	40	40	40	40	40	40	40	40	40	40	40	40	40
hsa-miR-663B-002857	40	40	40	34.9652	40	40	40	40	40	40	40	40	40	40	40	40
hsa-miR-664-002897	40	40	40	40	40	40	40	40	40	40	40	40	40	40	40	40
hsa-miR-665-002681	40	40	40	40	40	40	40	40	40	40	40	40	40	40	40	40
hsa-miR-668-001992	40	40	40	40	40	34.7953	40	40	40	40	40	40	34.7851	40	40	40
hsa-miR-675-002005	40	40	40	40	40	40	40	40	40	40	40	40	40	40	40	40
dme-miR-7-000268	33.2508	40	40	40	40	40	40	40	40	40	40	40	40	40	40	40
rno-miR-7#-001338	40	32.7666	40	40	40	28.68	30.8127	40	34.0249	30.474	34.3211	40	40	31.7233	40	32.4496
hsa-miR-708#-002342	40	40	40	40	40	40	40	40	40	40	40	40	40	40	40	40
hsa-miR-7-2#-002314	40	40	40	40	40	40	40	40	40	33.1521	40	40	33.9533	40	40	36.2191
hsa-miR-720-002895	28.6511	25.799	25.9233	27.684	28.4543	25.2454	25.0225	28.4025	29.3678	26.3773	26.7434	25.7598	25.9386	25.9392	25.7832	25.6137
hsa-miR-744#-002325	40	32.6613	40	40	40	40	40	40	40	40	40	35.1269	40	35.4007	32.9252	40
hsa-miR-765-002643	40	40	40	40	40	40	40	40	40	33.8208	40	32.2871	40	31.7269	40	40
hsa-miR-766-001986	29.884	25.6872	27.6431	30.3075	40	27.4577	27.7447	30.4785	30.6538	27.63	28.2615	27.7974	27.3359	28.364	28.7213	29.1819
hsa-miR-767-3p-001995	40	40	40	40	40	40	40	40	40	40	40	40	40	40	40	40
hsa-miR-767-5p-001993	40	40	40	40	40	40	40	40	40	40	40	40	40	40	40	40
hsa-miR-769-3p-002003	40	40	40	40	40	40	40	40	40	40	40	40	40	40	40	33.4712
hsa-miR-769-5p-001998	40	40	32.4896	40	40	40	40	40	40	32.8938	40	40	40	40	40	40
hsa-miR-770-5p-002002	40	40	40	40	40	40	40	40	40	40	40	33.987	40	31.8743	40	40
hsa-miR-802-002004	40	40	40	40	40	40	40	40	40	40	40	40	40	40	40	40
hsa-miR-875-5p-002203	40	33.3012	34.2162	32.285	32.8694	33.8609	32.9948	35.2531	33.5135	40	33.6197	34.0825	37.9312	40	40	37.5641
hsa-miR-888#-002213	40	40	40	40	40	40	40	40	40	40	40	40	40	40	40	40
hsa-miR-892b-002214	30.6079	29.7128	30.9177	29.4545	29.9604	29.8062	29.6874	31.6796	30.9642	30.2861	29.9492	31.9703	30.2965	28.9875	27.2001	28.8124
hsa-miR-9#-002231	40	31.996	40	40	40	33.2495	30.9814	40	40	40	40	31.0754	40	32.4008	31.8806	33.9992
hsa-miR-920-002150	40	40	40	40	40	40	40	40	40	40	40	40	40	40	40	40
hsa-miR-921-002151	40	32.3	31.9585	40	40	32.4681	32.7486	40	40	31.9305	32.6075	30.8989	31.0271	31.1396	32.6285	30.416
hsa-miR-922-002152	40	40	40	40	40	40	40	40	40	40	40	40	40	35.3625	40	40
hsa-miR-924-002154	40	40	40	40	40	40	40	40	40	40	40	40	40	40	40	40
hsa-miR-92a-1#-002137	40	33.4612	34.802	40	40	40	40	40	40	32.5335	40	40	33.2129	40	40	33.2366
hsa-miR-92a-2#-002138	40	40	40	40	40	40	40	40	40	40	40	40	34.2492	40	40	40
hsa-miR-92b#-002343	40	40	40	40	40	40	40	40	40	40	40	40	40	40	40	40
hsa-miR-93#-002139	40	28.6955	31.9611	40	33.1574	28.8697	28.9995	34.5115	40	30.6017	30.432	31.424	31.6594	40	31.4752	30.533
hsa-miR-933-002176	40	40	40	40	40	40	40	40	40	40	40	40	40	40	40	40
hsa-miR-934-002177	40	40	40	40	40	40	40	40	40	40	40	40	40	40	40	40
hsa-miR-935-002178	40	40	40	40	40	40	40	40	40	40	40	40	40	40	40	40
hsa-miR-936-002179	40	40	40	40	40	40	40	40	40	40	40	40	40	40	40	40
hsa-miR-937-002180	40	40	40	40	40	40	40	40	40	40	40	40	40	40	40	40
hsa-miR-938-002181	40	40	40	40	40	40	40	40	40	40	40	40	40	40	40	40
hsa-miR-939-002182	40	40	40	40	40	40	40	40	40	40	40	40	40	40	40	40
hsa-miR-941-002183	40	40	40	40	40	40	40	40	40	40	40	40	40	40	40	40
hsa-miR-942-002187	40	32.2265	40	40	40	33.3236	34.5819	40	36.8767	35.2804	35.4867	40	34.3551	40	33.7331	36.0167
hsa-miR-943-002188	40	40	40	40	40	40	40	40	40	40	40	40	40	40	40	40
hsa-miR-944-002189	40	40	40	40	40	40	40	40	40	40	40	40	40	40	40	40
hsa-miR-96#-002140	40	40	40	40	40	40	40	40	40	40	40	40	40	40	40	40
hsa-miR-99a#-002141	40	40	40	40	40	40	40	40	40	34.207	40	40	40	40	40	40
hsa-miR-99b#-002196	30.6994	31.4682	31.1962	32.1189	30.7961	31.8101	31.7107	32.1588	32.6221	29.0964	30.7093	33.2643	31.727	32.5573	40	33.0376
