# Supplementary figures and images for: Identification and Validation Model for Informative Liquid Biopsy-Based microRNA Biomarkers: Insights from Germ Cell Tumor In Vitro, In Vivo and Patient-Derived Data
Source: MDPI journal article supplement (doi:10.3390/cells8121637), 2019-12-14

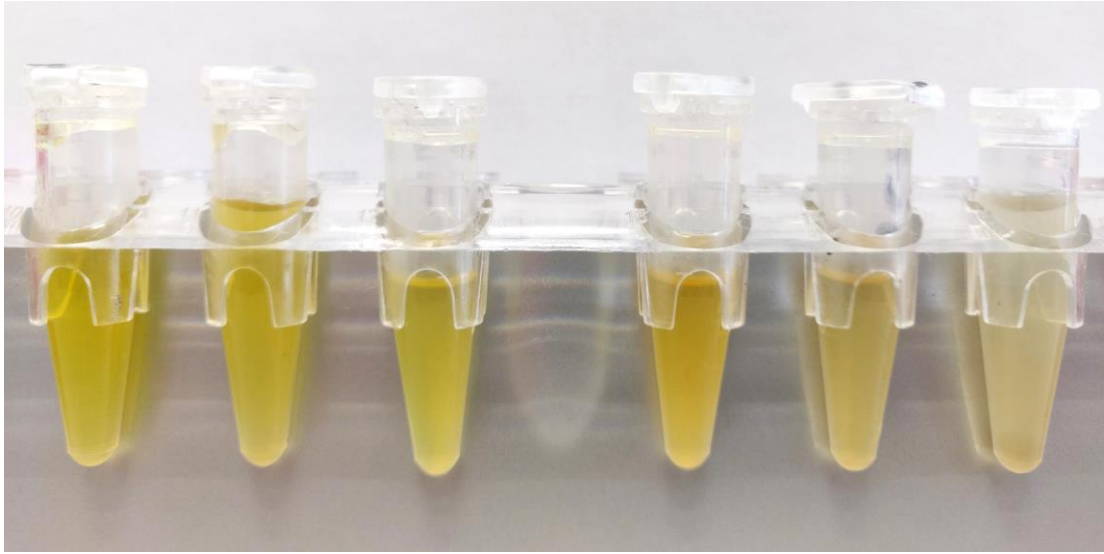

A

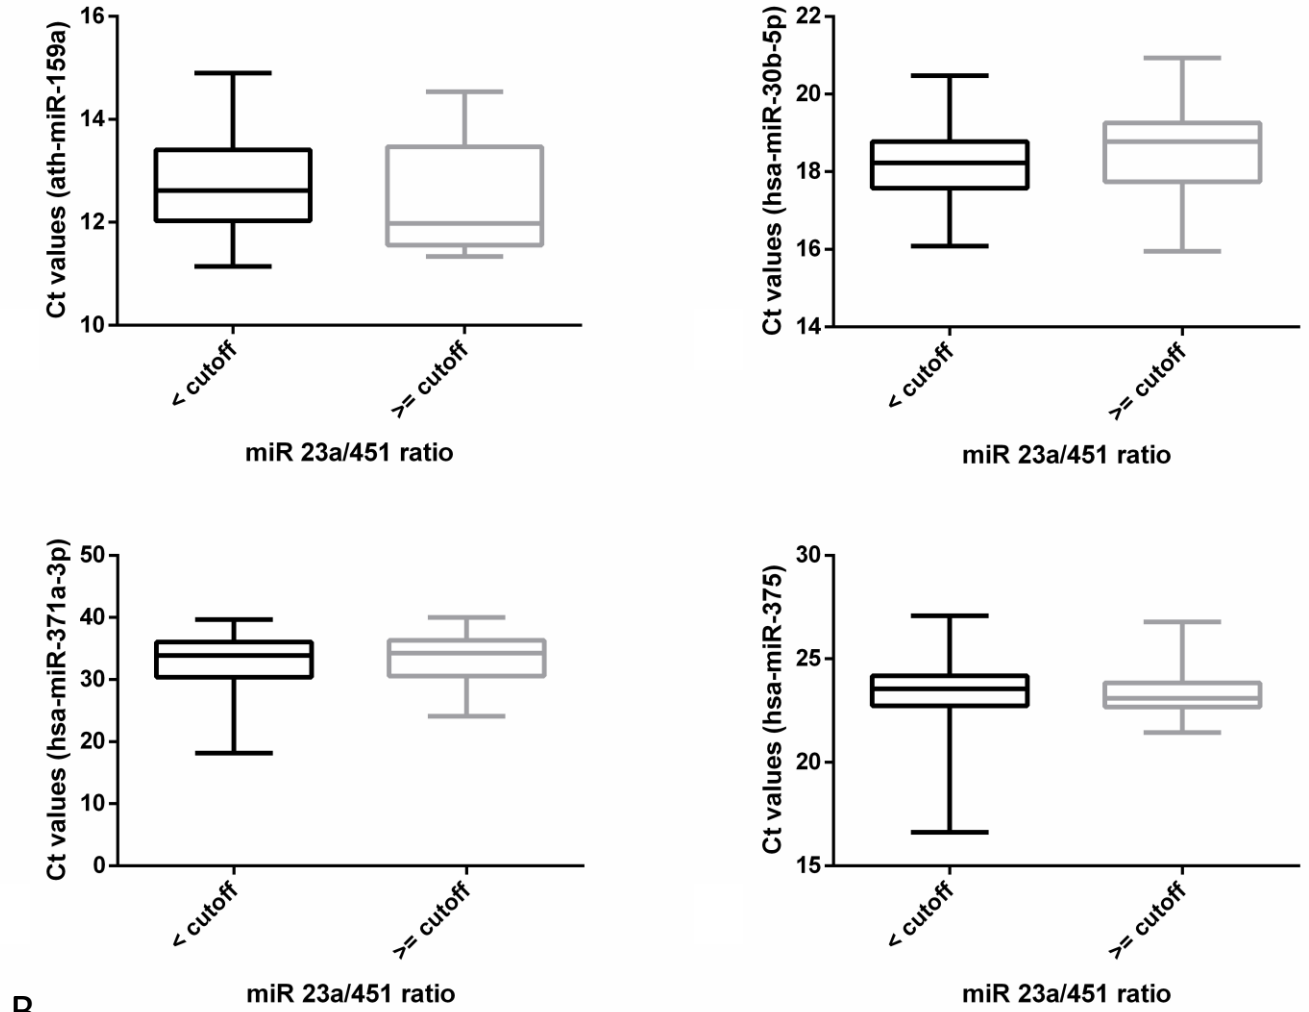

Supplement: s1 [file s1]

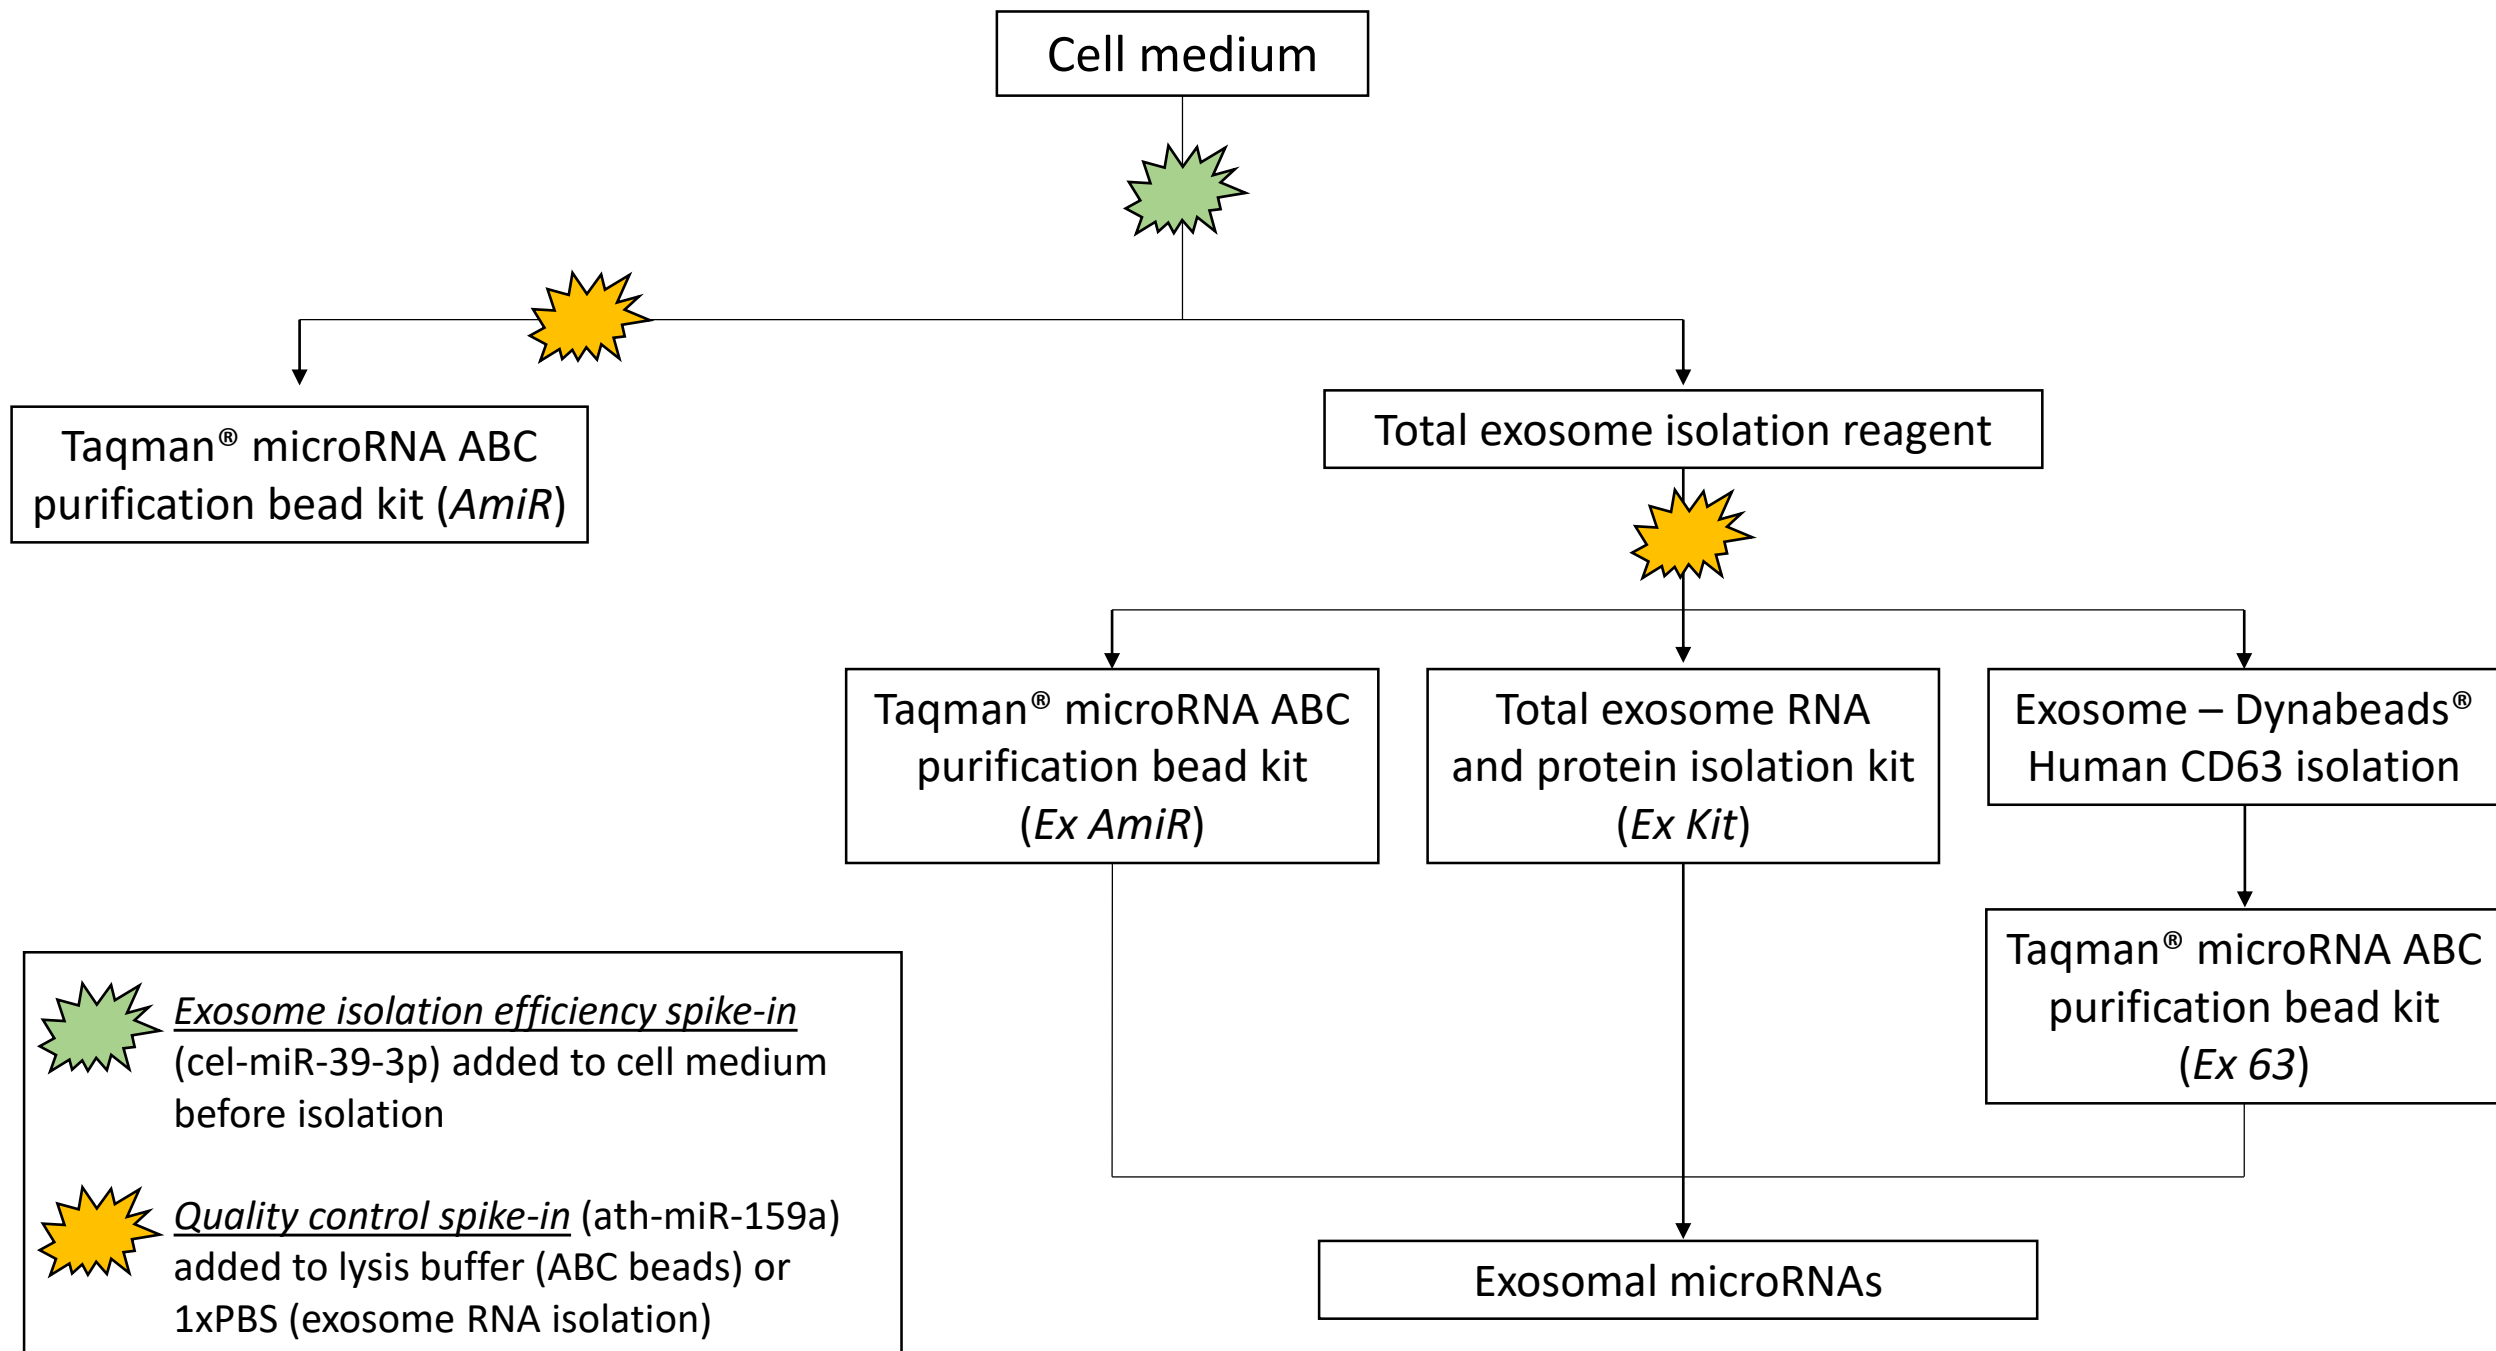

Supplement: s1 [file s1]

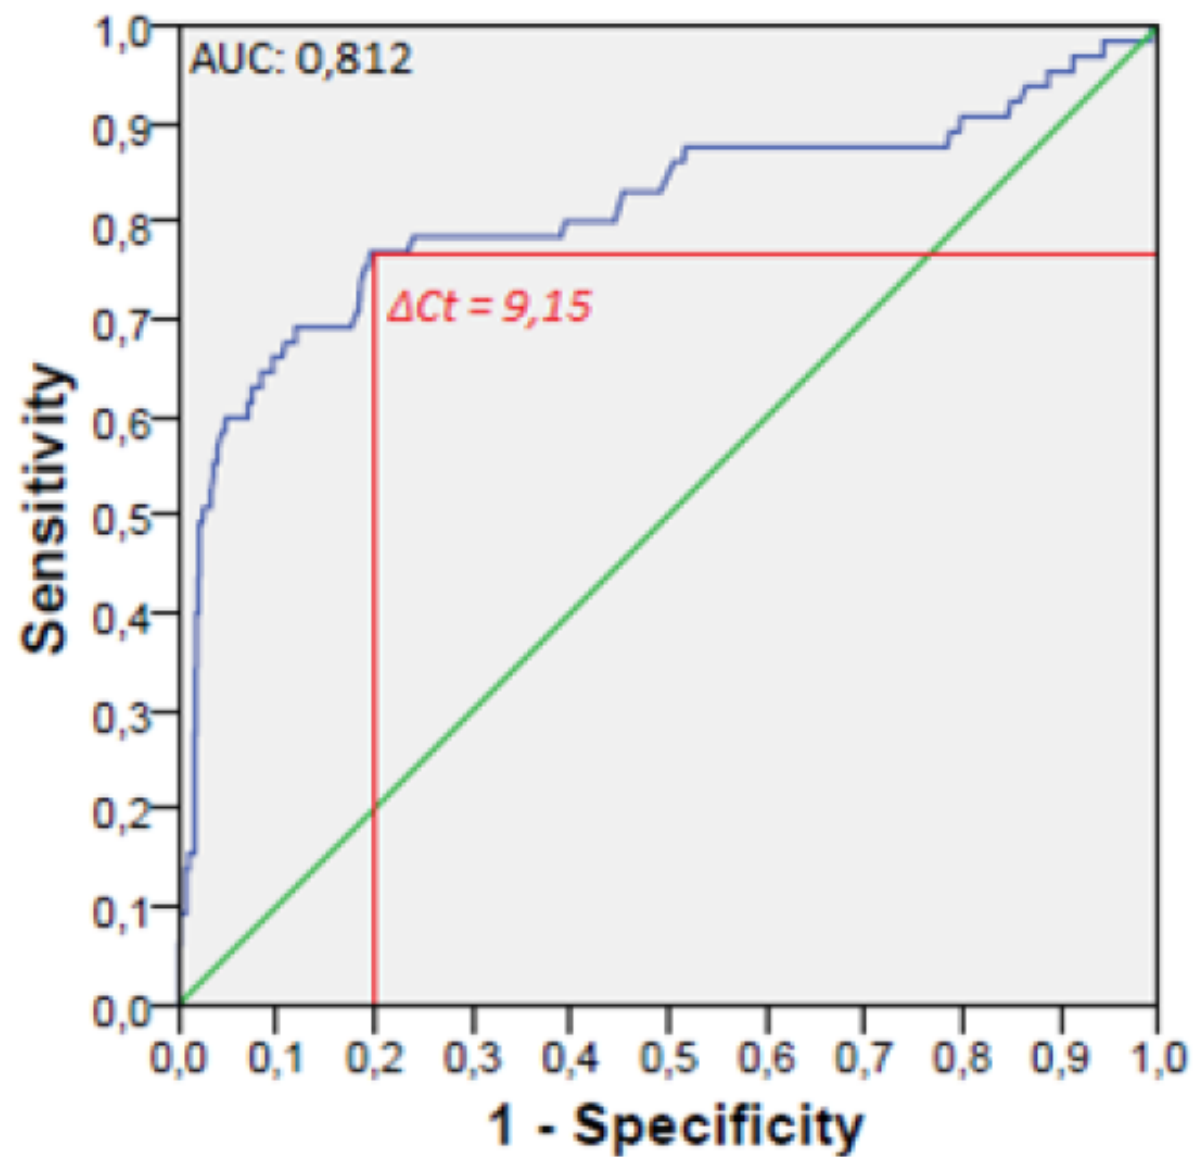

A

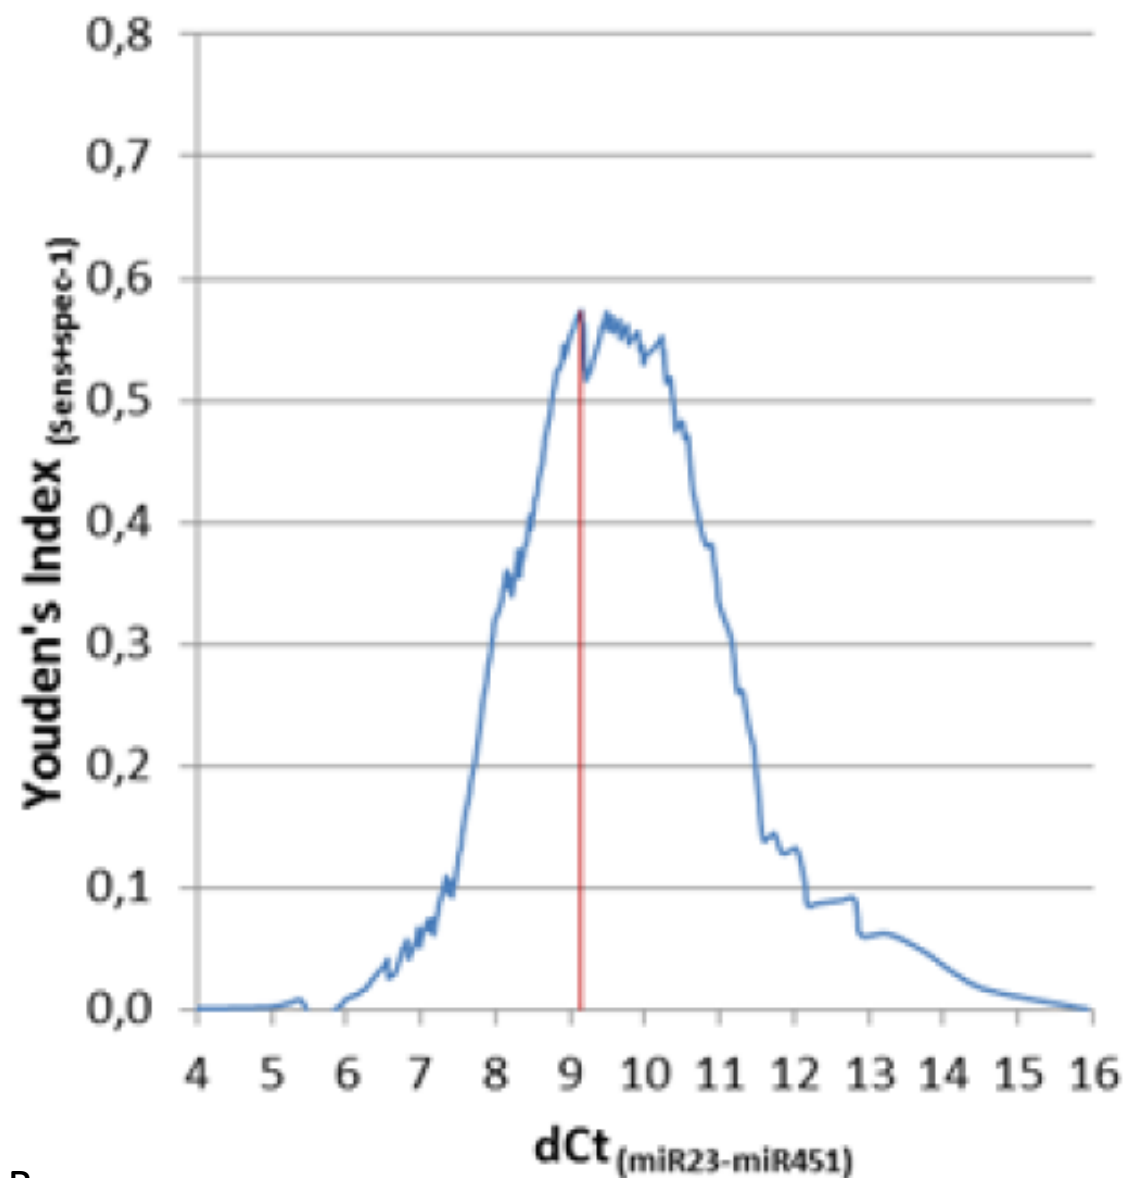

B

Supplement: s1 [file s1]

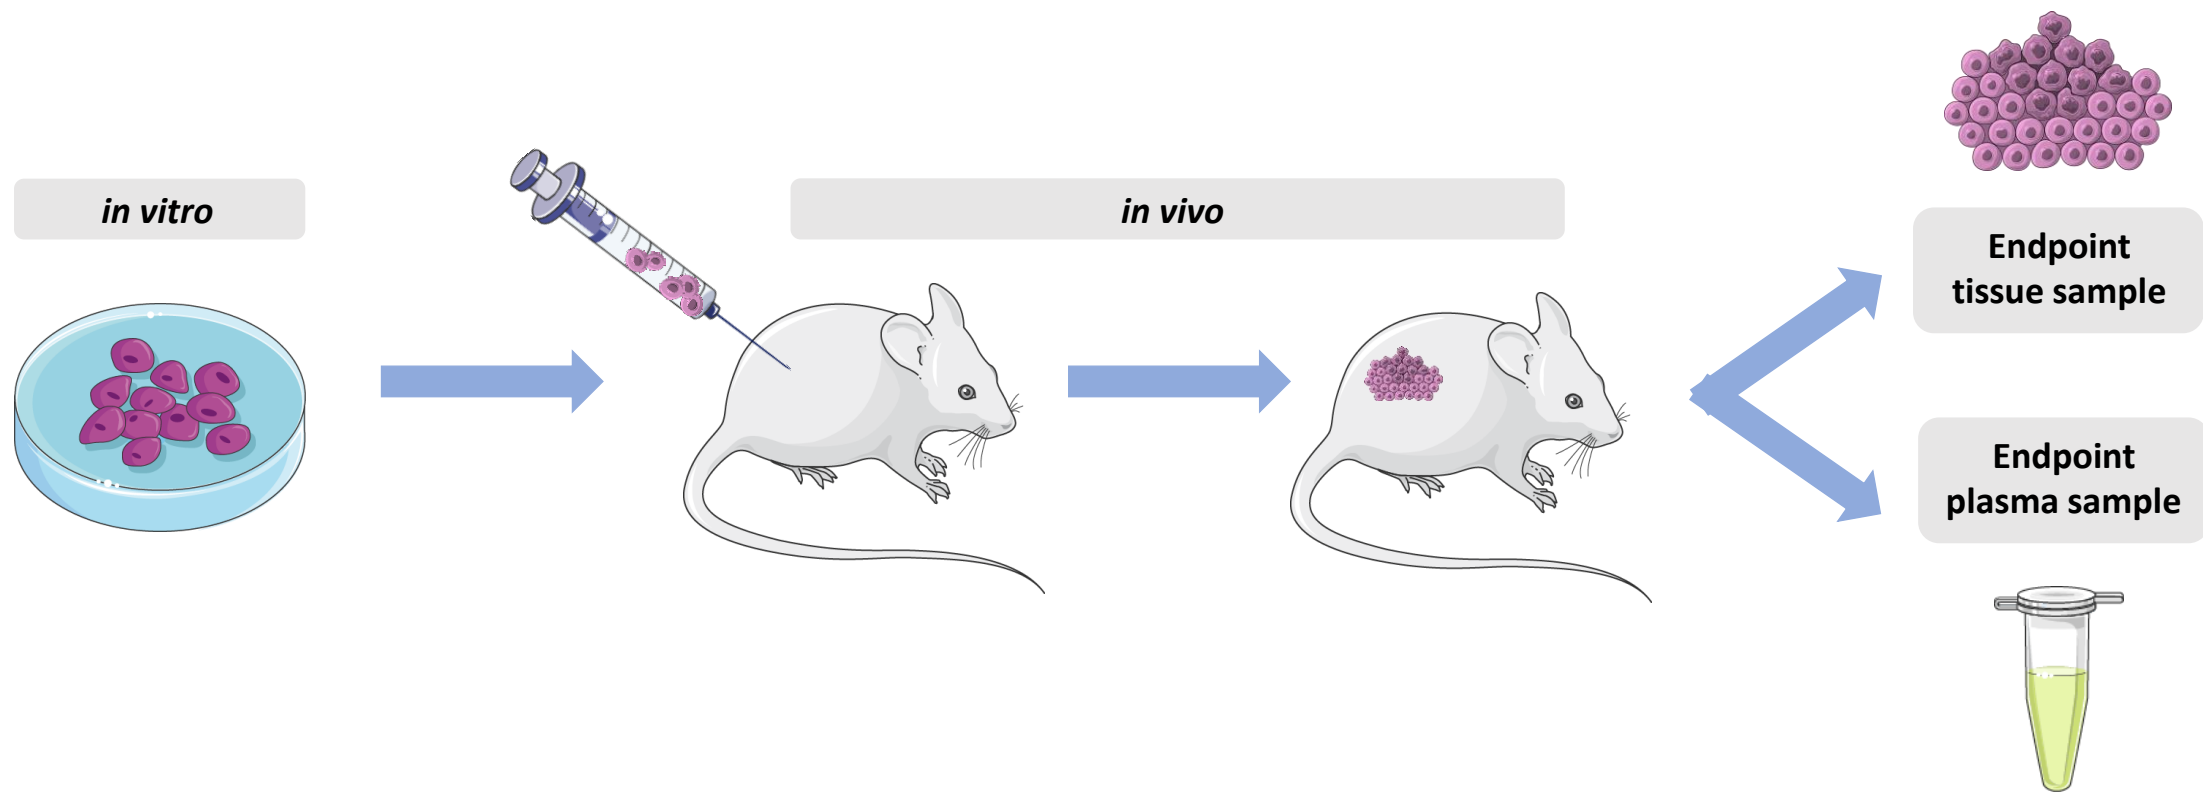

Supplement: s1 [file s1]

**A** Cel-miR-39-3p

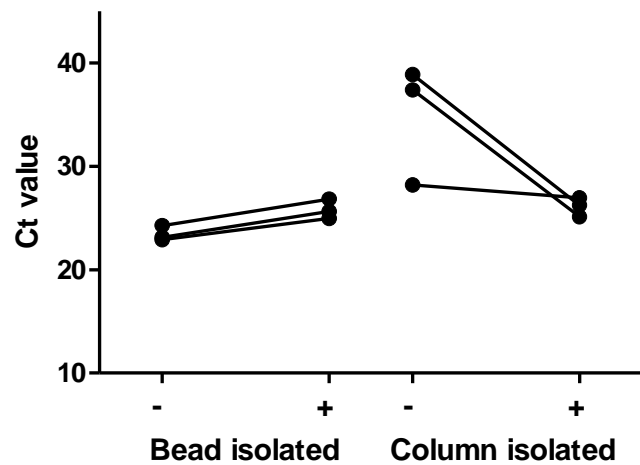

**B** Cel-miR-54-3p

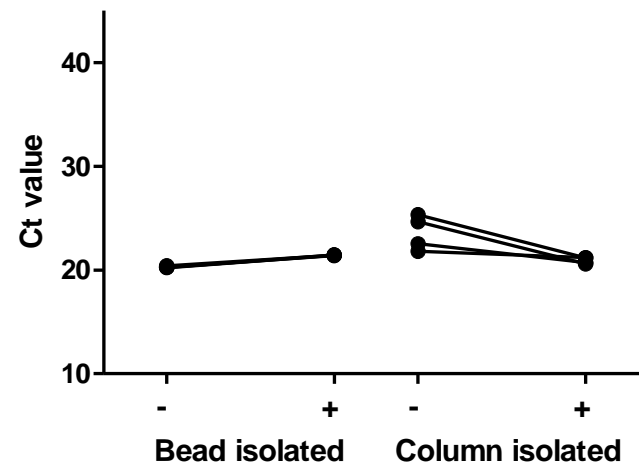

**C** Hsa-miR-21-5p

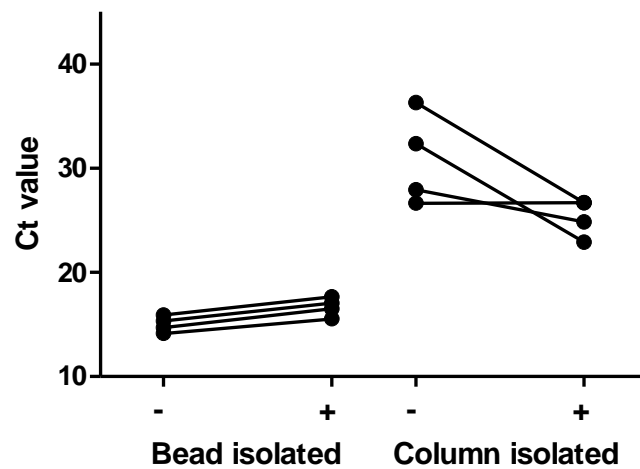

**D** Hsa-miR-505-3p

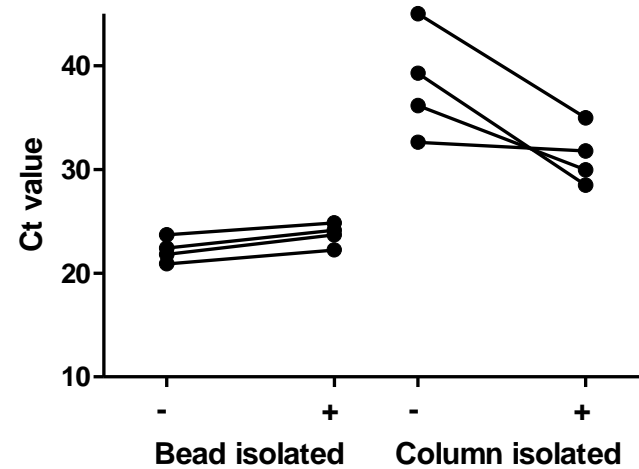

Supplement: s1 [file s1]
